# Supplementary material for: Cardiotoxicity detection tool for breast cancer chemotherapy: a retrospective study
Source: PeerJ journal article supplement (doi:10.7717/peerj-cs.2230), 2024-08-02
Supplement: toolboxcode.zip [file toolboxcode.zip]

## Sheet: Median
patient ID				Parameters
				pre-therapy																																	post-therapy
	BMI	chemocare record	age	date	LVEF%	LVEFPhase	Synchrony	SynchronyMaxMin	Entropy	EntropyMaxMin	App_Entropy	App_EntropyMaxMin	LHR	Average FS	LA FS	SA FS	Circulatory diastole	Circulatory Systole	Elongation Diastole	Elongation systole	(mean RR duration)	rejected beats	Accepted beats	Heart rate	frame time	Manufacturer	Phase	BoundApEn	BoundApEnMaxMin	ε	Log(ε)	Max Count	Max Pixel Num	Min Count	Min Pixel Num	kinetics	date	LVEF%	LVEF_Phase%	Synchrony	SynchronyMaxMin	Entropy	EntropyMaxMin	App_Entropy	App_EntropyMaxMin	LHR	Average FS	LA FS	SA FS
0312542186			060Y	2015-04-13	92.742	100.248	0.936718	0.984021	0.687212	0.984021	0.140751	0.241195	0.533944	0.22357	0.224622	0.222518	0.240225	0.240404	0.752524	0.754566	645	0	1319	93	39.9375	SIEMENS NM	165.331	0.146134	0.238912	0.274439	-1.29303	2707.14	451	196.483	259		2015-08-17	48.7337	100.08	0.935544	0.985878	0.673245	0.985878	0.155368	0.241195	0.477929	0.213332	0.161948	0.264717
3008822223			032Y	2014-10-21	60.3711	100.43	0.883439	0.979781	0.558521	0.979781	0.127656	0.209824	0.708638	0.219114	0.242896	0.195332	0.238056	0.242114	0.729447	0.775274	1153	107	492	52	73.9375	SIEMENS NM	167.926	0.200721	0.209265	0.282942	-1.26251	10816	461	4286.27	269		2015-01-15	59.0776	100.255	0.927959	0.985485	0.671599	0.985485	0.144815	0.209824	0.783363	0.222958	0.22537	0.220545
0107652005			049Y	2014-08-04	64.6091	100.156	0.947699	0.986003	0.814579	0.986003	0.156926	0.210979	0.84444	0.213361	0.192698	0.234024	0.236217	0.231905	0.711792	0.675355	722	27	805	83	42.8125	SIEMENS NM	164.75	0.472312	0.209964	0.298415	-1.20927	6096.3	453	2157.53	262		2015-01-19	55.3223	100.226	0.908043	0.971699	0.682693	0.971699	0.116042	0.210979	0.728147	0.222319	0.226572	0.218065
1506830862			031Y	2014-12-15	69.1864	100.203	0.946061	0.986385	0.821062	0.986385	0.0931297	0.210779	0.718802	0.218349	0.194898	0.2418	0.238056	0.233355	0.729447	0.686953	759	36	865	79	46.9375	SIEMENS NM	146.8	0.329826	0.210129	0.336386	-1.0895	7067.87	452	2177.87	257		2014-12-15	69.1864	100.203	0.946061	0.986385	0.821062	0.986385	0.0931297	0.210779	0.74294	0.218349	0.194898	0.2418
1509631046			049Y	2012-10-23	59.2926	100.147	0.906777	0.981618	0.748036	0.981618	0.0902585	0.169779	0.80883	0.223221	0.223692	0.22275	0.240308	0.240388	0.753473	0.754387	1111	74	985	54	69.4375	SIEMENS NM	151.755	0.343921	0.188393	0.340453	-1.07748	11536.8	452	4696.31	264		2015-07-24	59.2388	100.29	0.812096	0.9686	0.568776	0.9686	0.118136	0.169779	0.607962	0.246266	0.247035	0.245497
0801792207			036Y	2015-10-02	58.3236	100.197	0.949662	0.988195	0.669653	0.988195	0.0637167	0.220706	0.651859	0.221081	0.235214	0.206949	0.238956	0.241372	0.738688	0.765988	1052	111	534	57	67.375	SIEMENS NM	146.238	0.485972	0.215711	0.338592	-1.08296	6075.07	454	2531.87	262		2015-11-09	57.7694	100.556	0.950389	0.984575	0.693692	0.984575	0.0705177	0.220706	0.617297	0.222099	0.220595	0.223602
2111652148			047Y	2013-01-22	62.3539	100.078	0.88526	0.990599	0.714643	0.990599	0.165557	0.219533	0.665319	0.224614	0.221601	0.227627	0.237923	0.23735	0.728124	0.722487	833	2	717	72	51.8125	SIEMENS NM	162.704	0.204438	0.216459	0.229357	-1.47248	11210.4	456	4220.29	262		2013-10-21	54.6526	100.064	0.896597	0.984302	0.662612	0.984302	0.15195	0.219533	0.684396	0.226158	0.22656	0.225755
1302522183			061Y	2013-05-09	65.1531	100.181	0.934822	0.984162	0.630846	0.984162	0.10519	0.217106	0.884433	0.225854	0.221652	0.230056	0.240739	0.240022	0.758436	0.750247	895	33	1056	67	57.2812	SIEMENS NM	156.347	0.117857	0.213231	0.257578	-1.35643	7153.76	453	2492.86	260		2014-08-18	72.0071	100.049	0.918107	0.96835	0.616448	0.96835	0.139683	0.217106	1.07181	0.22192	0.230463	0.213376
1909472174			066Y	2014-08-20	67.7674	100.217	0.914203	0.98674	0.736753	0.98674	0.0519951	0.201186	0.543623	0.220014	0.227936	0.212091	0.239888	0.241218	0.748753	0.76412	740	0	552	81	45.125	SIEMENS NM	143.855	0.452159	0.199173	0.350621	-1.04805	9012.62	458	2905	261		2014-11-24	73.8769	100.266	0.930329	0.989283	0.748468	0.989283	0.133129	0.201186	0.615972	0.219708	0.236382	0.203034
2401402012			075Y	2015-05-26	54.5154	100.033	0.898177	0.982363	0.713121	0.982363	0.172158	0.209881	0.534013	0.228195	0.199776	0.256613	0.241093	0.235851	0.762617	0.708451	689	44	855	87	42.75	SIEMENS NM	163.573	0.354156	0.206259	0.300461	-1.20244	12015	455	5464.96	263		2015-08-06	60.3655	100.061	0.920036	0.985744	0.670353	0.985744	0.196444	0.209881	0.588124	0.219088	0.227027	0.211148
0603552064			061Y	2016-06-27	59.1711	99.9937	0.937901	0.981186	0.696813	0.981186	0.125409	0.214044	0.911014	0.22132	0.203803	0.238837	0.240169	0.236968	0.751901	0.718817	1016	19	638	59	62.875	SIEMENS NM	149.934	0.154832	0.211701	0.228599	-1.47578	9062.62	453	3700.17	266		2016-11-28	56.3295	99.9502	0.948364	0.992357	0.718608	0.992357	0.159221	0.214044	0.917633	0.215245	0.196852	0.233637
2910525244			062Y	2015-08-10	63.6764	100.398	0.946499	0.949111	0.84581	0.949111	0.13335	0.215995	0.67575	0.242142	0.238149	0.246135	0.240824	0.240131	0.759432	0.751471	882	0	604	68	56.125	SIEMENS NM	157.572	0.278906	0.222065	0.31467	-1.15623	12942.7	476	4701.27	304		2017-02-01	72.8825	100.358	0.906265	0.979353	0.652596	0.979353	0.0949116	0.215995	0.647937	0.240267	0.214803	0.265731
0805745688			041Y	2015-05-15	53.1758	100.114	0.974742	0.990036	0.876486	0.990036	0.147275	0.222277	0.60916	0.217941	0.229846	0.206036	0.235616	0.237928	0.70633	0.728166	769	8	535	78	47.3125	SIEMENS NM	162.062	0.402279	0.220744	0.294474	-1.22256	7954	460	3724.4	264		2016-04-11	56.9263	100.428	0.900269	0.982363	0.639349	0.982363	0.141911	0.222277	0.653417	0.227572	0.231058	0.224085
0709592086			055Y	2014-11-10	63.0457	100.302	0.94771	0.984302	0.736531	0.984302	0.115642	0.22376	0.601637	0.219877	0.220377	0.219377	0.237929	0.238023	0.728182	0.729115	952	30	571	63	59.75	SIEMENS NM	163.519	0.44752	0.221054	0.33799	-1.08474	8582.71	455	3171.68	261		2016-06-08	58.4192	100.307	0.931639	0.983347	0.528455	0.983347	0.101732	0.22376	0.530139	0.220895	0.211145	0.230645
2712910923			026Y	2018-08-15	63.8098	100.17	0.894663	0.982671	0.644389	0.982671	0.105208	0.201283	0.606083	0.221307	0.204681	0.237934	0.239176	0.236025	0.741016	0.710033	833	17	632	72	51.75	SIEMENS NM	160.28	0.134048	0.20142	0.263202	-1.33484	8224.38	459	2976.42	267		2019-01-09	58.5606	100.085	0.868892	0.984439	0.631792	0.984439	0.124581	0.201283	0.587493	0.217391	0.235936	0.198846
2106750625			037Y	2013-03-22	65.1446	100.644	0.989273	0.982783	0.909161	0.982783	0.173499	0.218805	0.608296	0.221979	0.22729	0.216668	0.239277	0.240205	0.742101	0.752302	779	67	908	77	49.6875	SIEMENS NM	165.852	0.337468	0.216705	0.239341	-1.42987	6610.27	454	2304.03	263		2014-03-07	48.3329	100.265	0.986135	0.99972	0.85977	0.99972	0.162882	0.218805	0.699806	0.219602	0.230669	0.208535
1810672082			045Y	2012-11-12	65.8574	100.131	0.947756	0.983199	0.760732	0.983199	0.110217	0.236838	0.798891	0.219423	0.230614	0.208232	0.236147	0.238292	0.711145	0.731833	833	51	613	72	47.2188	SIEMENS NM	158.877	0.400938	0.238571	0.324651	-1.125	8114.8	453	2770.6	261		2013-06-27	61.3356	100.395	0.931718	0.977484	0.602629	0.977484	0.115942	0.236838	0.789964	0.223308	0.204295	0.242321
1810792169			037Y	2017-06-29	55.2515	100.077	0.952394	0.98968	0.810517	0.98968	0.207301	0.252108	0.80844	0.220326	0.209147	0.231505	0.239867	0.237847	0.748526	0.727365	759	1	968	79	46.8125	SIEMENS NM	171.734	0.202411	0.25071	0.240944	-1.42319	7536.18	452	3372.32	262		2018-03-08	55.5153	100.066	0.947199	0.984439	0.71698	0.984439	0.188016	0.252108	0.818867	0.215312	0.220507	0.210117
0808582232			057Y	2016-06-02	41.0846	100.035	0.984921	0.999829	0.806978	0.999829	0.105332	0.216838	0.453682	0.222733	0.246311	0.199155	0.236454	0.240758	0.713986	0.758658	659	89	662	91	40.9688	SIEMENS NM	152.698	0.10186	0.214145	0.225697	-1.48856	15367.6	455	9053.91	262		2017-04-18	43.8865	99.9614	0.96409	0.987364	0.786122	0.987364	0.199212	0.216838	0.485418	0.226761	0.228729	0.224793
1909612022			056Y	2017-11-30	56.9268	99.9886	0.869516	0.980578	0.629891	0.980578	0.139057	0.207881	0.765873	0.218309	0.200997	0.235622	0.236305	0.23271	0.712601	0.681721	1111	80	854	54	69.1875	SIEMENS NM	158.071	0.197792	0.203944	0.25705	-1.35849	11872.1	452	5113.71	264		2018-07-02	56.5484	99.9719	0.888014	0.981618	0.578917	0.981618	0.125514	0.207881	0.734106	0.222805	0.234297	0.211314
2608472060			070Y	2018-07-03	56.1652	99.9319	0.899555	0.982207	0.577267	0.982207	0.210824	0.226124	0.559344	0.224489	0.215913	0.233065	0.238933	0.23733	0.738447	0.722294	1000	35	818	60	62.5625	SIEMENS NM	173.14	0.202434	0.227158	0.227129	-1.48224	11696.5	453	5127.11	262		2019-04-01	54.5933	99.9322	0.898387	0.98674	0.553613	0.98674	0.21307	0.226124	0.732192	0.224331	0.214259	0.234403
0711782164			037Y	2016-10-14	72.4706	100.263	0.939455	0.982099	0.756489	0.982099	0.12686	0.224949	0.710506	0.218563	0.202092	0.235033	0.240637	0.237708	0.75725	0.725987	740	67	767	81	42.5	SIEMENS NM	156.809	0.152269	0.221986	0.283822	-1.25941	5861	458	1613.5	265		2017-01-16	68.0574	100.433	0.952237	0.981941	0.807682	0.981941	0.0922723	0.224949	0.682511	0.223758	0.239531	0.207985
2807542042			061Y	2016-06-29	50.4145	100.211	0.954587	0.99403	0.756896	0.99403	0.210545	0.241942	0.517511	0.21994	0.216071	0.223808	0.239174	0.238473	0.740996	0.733683	652	7	1239	92	40.5625	SIEMENS NM	167.261	0.210591	0.242414	0.211497	-1.55355	11297.2	451	5601.76	260		2017-01-24	42.0682	100.063	0.989148	0.99791	0.888945	0.99791	0.174572	0.241942	0.45714	0.218573	0.200298	0.236848
0705792129			036Y	2015-09-10	63.1048	100.345	0.914979	0.979242	0.706036	0.979242	0.0761463	0.215791	0.864731	0.219789	0.200602	0.238976	0.241112	0.237733	0.762853	0.726233	952	21	607	63	58.125	SIEMENS NM	147.748	0.135419	0.210925	0.253722	-1.37152	7936	455	2928	267		2016-05-19	54.8281	100.053	0.883892	0.984968	0.530598	0.984968	0.129836	0.215791	0.944601	0.219825	0.236304	0.203346
3009612133			055Y	2017-01-27	80.8649	100.548	0.970432	0.981781	0.804523	0.981781	0.112895	0.214016	0.529154	0.215537	0.233254	0.197821	0.235535	0.238911	0.705609	0.738217	705	7	743	85	43.6875	SIEMENS NM	161.107	0.451374	0.208764	0.309185	-1.17382	5205.27	454	996.033	263		2017-06-06	75.7038	100.2	0.944274	0.983493	0.764611	0.983493	0.125312	0.214016	0.459277	0.228192	0.245328	0.211055
1908592109			057Y	2017-01-27	60.8271	100.048	0.962644	0.989708	0.827036	0.989708	0.153138	0.221811	0.847447	0.225919	0.225157	0.226681	0.239035	0.238897	0.739524	0.738069	750	23	728	80	46.9375	SIEMENS NM	171.077	0.315962	0.218258	0.305894	-1.18452	7137.93	461	2796.13	263		2017-05-25	49.4574	100.014	0.976979	0.99339	0.827862	0.99339	0.136578	0.221811	0.685299	0.22727	0.22132	0.23322
1308512023			064Y	2016-07-18	53.3766	100.102	0.882986	0.982934	0.660333	0.982934	0.125582	0.223613	0.621341	0.222837	0.237026	0.208648	0.236535	0.239204	0.714734	0.741317	810	0	752	74	50.2812	SIEMENS NM	149.715	0.169344	0.224072	0.241385	-1.42136	13170.7	456	6140.64	263		2017-04-04	52.6539	100.12	0.913958	0.986003	0.609959	0.986003	0.120065	0.223613	0.597157	0.221008	0.236597	0.205419
0404502067			066Y	2016-06-01	52.0867	100.098	0.938469	0.999002	0.793115	0.999002	0.215294	0.229553	0.583813	0.222387	0.209716	0.235057	0.238745	0.236334	0.736488	0.712873	789	2	867	76	49.625	SIEMENS NM	170.825	0.207009	0.225787	0.235699	-1.4452	12610.2	457	6041.98	261		2017-02-20	53.1439	100.053	0.943291	0.981941	0.782013	0.981941	0.141888	0.229553	0.560315	0.217287	0.24927	0.185304
1406432334			073Y	2017-02-21	63.3546	99.9599	0.90107	0.985744	0.562052	0.985744	0.189139	0.236285	0.629094	0.218176	0.246031	0.190322	0.234466	0.239793	0.696259	0.747704	923	5	754	65	57.3125	SIEMENS NM	166.794	0.182758	0.236826	0.23823	-1.43452	7727.2	456	2831.67	260		2017-08-23	56.6013	99.906	0.890083	0.988152	0.622259	0.988152	0.168185	0.236285	0.629369	0.219643	0.19412	0.245165
1603472282			065Y	2012-10-24	56.432	100.166	0.974695	0.985228	0.96166	0.985228	0.15973	0.210483	0.495392	0.227674	0.262695	0.192653	0.234016	0.24072	0.692439	0.758219	1016	0	323	59	62.625	SIEMENS NM	161.055	0.228399	0.209198	0.235385	-1.44653	8816.73	455	3841.27	260		2013-03-15	54.7795	100.23	0.841676	0.985097	0.444356	0.985097	0.130673	0.210483	0.49978	0.22329	0.218307	0.228273
2610542364			061Y	2015-12-14	62.4579	99.9893	0.9214	0.979958	0.729702	0.979958	0.13969	0.231128	1.00817	0.219136	0.221625	0.216646	0.239446	0.239881	0.743915	0.748674	895	1	783	67	55.2188	SIEMENS NM	157.114	0.177469	0.235712	0.255248	-1.36552	9190.93	451	3450.47	263		2016-08-15	63.0447	100.006	0.909067	0.986248	0.693508	0.986248	0.0865215	0.231128	0.98691	0.218985	0.211864	0.226106
1705552188			060Y	2016-01-27	48.4965	100.095	0.973825	0.9995	0.851731	0.9995	0.151331	0.2056	0.536955	0.220346	0.220323	0.220369	0.239158	0.239154	0.740827	0.740784	821	10	884	73	50.25	SIEMENS NM	168.754	0.157314	0.203136	0.198461	-1.61716	12510.8	456	6443.49	256		2016-10-17	52.1815	100.039	0.917349	0.981086	0.718999	0.981086	0.0749564	0.2056	0.676019	0.225589	0.222967	0.228211
2601712147			044Y	2015-12-17	60.7953	100.205	0.86723	0.984439	0.524799	0.984439	0.147979	0.199125	0.637858	0.22546	0.224503	0.226416	0.240641	0.240479	0.757293	0.755425	1176	34	452	51	73.3125	SIEMENS NM	154.401	0.169859	0.202661	0.225185	-1.49083	12563.2	457	4925.37	263		2016-09-09	57.2798	100.333	0.802274	0.984968	0.451248	0.984968	0.113916	0.199125	0.569612	0.230332	0.205767	0.254896
1511788089			038Y	2017-02-27	78.9127	100.388	0.93818	0.976228	0.74973	0.976228	0.0916748	0.217473	0.68074	0.220855	0.235209	0.206502	0.236454	0.239154	0.713984	0.740784	923	71	517	65	57.3125	SIEMENS NM	147.605	0.359705	0.223227	0.264965	-1.32816	6927.07	464	1460.73	274		2017-09-21	73.8252	100.668	0.941267	0.990414	0.638163	0.990414	0.116675	0.217473	0.593069	0.227849	0.251627	0.204072
1211962164			019Y	2016-10-18	59.0542	100.193	0.892167	0.982629	0.613998	0.982629	0.195464	0.228265	0.631438	0.214181	0.186216	0.242146	0.239092	0.233635	0.740125	0.689257	759	96	860	79	47.0938	SIEMENS NM	175.25	0.192091	0.226213	0.239585	-1.42885	9628.57	452	3942.49	261		2017-02-06	56.9027	100.165	0.930185	0.982518	0.601693	0.982518	0.20062	0.228265	0.642965	0.226119	0.251985	0.200253
2009735943			043Y	2016-10-05	55.5038	100.172	0.922546	0.980578	0.709788	0.980578	0.181049	0.236152	0.605971	0.225047	0.243014	0.207081	0.236696	0.240022	0.716248	0.750247	833	2	774	72	52.8438	SIEMENS NM	168.421	0.200604	0.236657	0.252218	-1.37746	10018.6	452	4457.89	263		2017-02-27	55.0181	100.186	0.930641	0.986248	0.699866	0.986248	0.121445	0.236152	0.537986	0.22173	0.199235	0.244224
1110602081			056Y	2017-02-28	59.7214	99.9553	0.865198	0.983347	0.619581	0.983347	0.169514	0.224115	0.727337	0.214494	0.169353	0.259636	0.239345	0.230154	0.742827	0.66209	631	4	1433	95	39.375	SIEMENS NM	160.898	0.285019	0.218765	0.306655	-1.18203	11344	455	4569.22	262		2017-11-21	49.9859	99.9636	0.916315	0.983083	0.637401	0.983083	0.180198	0.224115	0.524115	0.221618	0.211616	0.23162
1104702460			046Y	2017-03-02	60.4627	100.054	0.907333	0.976812	0.616548	0.976812	0.113636	0.218883	0.753435	0.214904	0.188149	0.241659	0.23872	0.233447	0.736232	0.687706	1000	106	483	60	63.125	SIEMENS NM	161.758	0.3573	0.211688	0.304789	-1.18814	8337.28	453	3296.34	268		2017-10-02	56.2921	100.038	0.867521	0.980136	0.688979	0.980136	0.185985	0.218883	0.702603	0.22514	0.242193	0.208086
1701622424			054Y	2016-10-27	60.4921	100.121	0.959053	0.999586	0.836302	0.999586	0.177097	0.221546	0.518129	0.220066	0.211208	0.228923	0.237884	0.236173	0.727735	0.711391	759	19	626	79	48.0938	SIEMENS NM	163.409	0.180388	0.220769	0.21285	-1.54717	8936.55	459	3530.64	264		2017-03-02	65.675	99.941	0.935011	0.984968	0.755799	0.984968	0.0802682	0.221546	0.555519	0.223023	0.226416	0.21963
2406552209			061Y	2016-08-02	53.3913	100.066	0.954609	0.997983	0.743107	0.997983	0.20499	0.202483	0.630838	0.225085	0.232487	0.217684	0.237864	0.239227	0.727528	0.741559	857	0	698	70	53.7188	SIEMENS NM	167.78	0.204319	0.200667	0.239567	-1.42892	10008	454	4664.58	260		2017-06-05	59.8969	100.071	0.931349	0.985358	0.643218	0.985358	0.16569	0.202483	0.618623	0.219501	0.221288	0.217713
1701522152			063Y	2015-07-29	78.0223	99.9524	0.808731	0.97969	0.509526	0.97969	0.13584	0.203362	0.645751	0.216115	0.21838	0.21385	0.236454	0.236895	0.713986	0.718125	895	2	530	67	54.7188	SIEMENS NM	157.942	0.147312	0.20737	0.240271	-1.42599	8854.43	454	1946	265		2016-05-30	64.7706	99.9861	0.857016	0.98005	0.60205	0.98005	0.115232	0.203362	0.851152	0.218897	0.209961	0.227833
0105582239			056Y	2014-10-03	60.6233	99.9991	0.905319	0.987222	0.630783	0.987222	0.152089	0.215746	0.742162	0.219816	0.17847	0.261162	0.240765	0.232791	0.758742	0.68237	937	0	650	64	58.25	SIEMENS NM	150.831	0.279421	0.233519	0.346154	-1.06087	10143.9	459	3994.33	260		2015-02-25	59.3182	100.043	0.903679	0.983347	0.65052	0.983347	0.165014	0.215746	0.560301	0.22623	0.2306	0.221861
0110622480			051Y	2013-12-10	61.047	100.021	0.908086	0.988501	0.575607	0.988501	0.198151	0.223517	0.700463	0.221913	0.217146	0.22668	0.237372	0.236445	0.722698	0.713897	845	37	860	71	51.6563	SIEMENS NM	163.167	0.207971	0.225983	0.235261	-1.44706	8731.47	460	3401.17	261		2014-09-01	51.9169	100.032	0.885043	0.98865	0.59526	0.98865	0.112529	0.223517	0.613244	0.226398	0.197164	0.255632
0707642108			048Y	2013-05-17	96.2006	100.705	0.974108	0.984968	0.777634	0.984968	0.184786	0.23208	0.637385	0.217964	0.211812	0.224115	0.236393	0.23516	0.713421	0.702285	1016	9	479	59	67.7812	SIEMENS NM	167.929	0.524379	0.229593	0.275568	-1.28892	3623.33	458	137.667	265		2014-03-18	71.772	100.559	0.96293	0.973464	0.814202	0.973464	0.158004	0.23208	0.651788	0.217916	0.231067	0.204765
0301582203			057Y	2015-01-06	63.353	100.101	0.894776	0.982934	0.724755	0.982934	0.169084	0.211872	0.588942	0.221561	0.22663	0.216492	0.239381	0.240263	0.743217	0.75296	555	14	1415	108	34.5	SIEMENS NM	167.16	0.40948	0.209488	0.306033	-1.18406	10933.2	456	4006.71	263		2015-09-21	58.6566	100.104	0.887216	0.985097	0.648645	0.985097	0.129286	0.211872	0.56751	0.216315	0.235873	0.196757
2501972112			017Y	2015-01-08	66.4696	100.341	0.829028	0.988048	0.562995	0.988048	0.125028	0.226921	0.493202	0.224779	0.228856	0.220701	0.237584	0.238352	0.724774	0.732439	1276	71	341	47	80	SIEMENS NM	157.197	0.178335	0.221416	0.242712	-1.41588	9540.7	459	3199.03	259		2015-04-30	59.3083	100.151	0.943827	0.987475	0.801187	0.987475	0.134364	0.226921	0.53866	0.225823	0.238008	0.213637
0606632026			051Y	2015-01-08	56.0121	100.039	0.911482	0.987222	0.752561	0.987222	0.0851445	0.214415	0.463259	0.22369	0.213469	0.233912	0.23989	0.238042	0.748774	0.729312	821	8	1159	73	50.9375	SIEMENS NM	152.938	0.13513	0.21568	0.292856	-1.22807	16678	459	7336.29	260		2015-07-14	55.687	100.037	0.839119	0.980311	0.551046	0.980311	0.170727	0.214415	0.479634	0.222441	0.255335	0.189548
0804532044			061Y	2014-12-08	54.58	99.9879	0.897607	0.968379	0.707826	0.968379	0.117402	0.246629	0.6004	0.238415	0.232387	0.244443	0.241494	0.240479	0.767479	0.755425	983	10	714	61	61.75	SIEMENS NM	154.279	0.124878	0.246494	0.238126	-1.43495	11800.9	465	5359.95	284		2015-11-09	63.0733	100.155	0.956826	0.985099	0.706707	0.985099	0.0666838	0.246629	0.7012	0.220319	0.240587	0.200051
1210692120			043Y	2013-07-05	60.016	100.211	0.937311	0.982783	0.669861	0.982783	0.156462	0.234348	0.669017	0.218579	0.230748	0.206411	0.237584	0.239793	0.724774	0.747704	1034	155	494	58	63.7813	SIEMENS NM	163.359	0.404137	0.235186	0.321266	-1.13549	7242.4	454	2895.8	263		2014-02-24	58.5498	100.234	0.928957	0.984302	0.623399	0.984302	0.100154	0.234348	0.890779	0.21719	0.219269	0.215111
0505602326			053Y	2013-08-19	55.6889	100.04	0.943306	0.990768	0.737967	0.990768	0.106216	0.212765	0.669086	0.236351	0.229711	0.242991	0.242	0.240912	0.773812	0.760472	869	24	695	69	54.0625	SIEMENS NM	150.892	0.318858	0.223927	0.314958	-1.15532	9785.8	469	4336.2	261		2014-05-08	54.1559	100.044	0.896636	0.980311	0.640763	0.980311	0.0705688	0.212765	0.647199	0.222462	0.228562	0.216362
1008692182			045Y	2015-03-23	56.3183	99.9993	0.969706	0.981781	0.715398	0.981781	0.211766	0.237582	0.718899	0.223923	0.228471	0.219375	0.237733	0.238582	0.726236	0.734798	800	393	1623	75	47.0312	SIEMENS NM	182.169	0.209738	0.238359	0.233017	-1.45664	6728.39	454	2939.08	265		2016-01-14	52.188	99.9909	0.951849	0.985744	0.77513	0.985744	0.198007	0.237582	0.734541	0.225329	0.236911	0.213746
3110652005			053Y	2019-04-01	56.3363	100.382	0.879479	0.971453	0.63737	0.971453	0.167788	0.185351	0.564319	0.242666	0.22604	0.259293	0.242865	0.240131	0.785207	0.751471	937	3	621	64	58.5	SIEMENS NM	167.815	0.419503	0.190221	0.337259	-1.0869	15112.7	464	6598.74	278		2019-10-28	56.75	100.429	0.857425	0.98362	0.578789	0.98362	0.0773762	0.185351	0.614055	0.233304	0.218065	0.248542
0404482201			065Y	2014-03-17	67.1862	100.153	0.941454	0.979958	0.735218	0.979958	0.119015	0.23785	0.68734	0.222846	0.229084	0.216609	0.237159	0.238339	0.720649	0.732311	697	2	574	86	41.5312	SIEMENS NM	154.519	0.192754	0.238622	0.215872	-1.53307	8033.1	451	2635.97	263		2014-10-29	66.9645	100.236	0.927045	0.981351	0.669833	0.981351	0.120026	0.23785	0.657335	0.224666	0.229932	0.219399
1903552087			059Y	2014-12-01	54.464	100.069	0.958217	0.987584	0.80882	0.987584	0.140608	0.214241	0.63685	0.218426	0.215925	0.220927	0.238175	0.237708	0.730647	0.725987	681	5	914	88	42.4688	SIEMENS NM	166.488	0.409474	0.212894	0.306538	-1.18241	10970.9	458	4995.71	261		2014-05-13	58.6428	100.062	0.965321	0.988298	0.799385	0.988298	0.141683	0.214241	0.566564	0.22616	0.217704	0.234616
0608770604			037Y	2014-09-09	62.9313	100.244	0.91599	0.985744	0.607111	0.985744	0.152014	0.23294	0.533811	0.21507	0.178425	0.251715	0.237804	0.230154	0.726937	0.66209	909	4	507	66	56.7188	SIEMENS NM	164.901	0.197554	0.229559	0.259046	-1.35075	9138	456	3387.33	263		2015-04-07	72.4718	100.339	0.940596	0.985228	0.651281	0.985228	0.122525	0.23294	0.577779	0.222801	0.217334	0.228268
3011552207			059Y	2015-11-02	81.8893	100.368	0.945742	0.986368	0.728923	0.986368	0.103773	0.228959	0.608231	0.220751	0.238551	0.20295	0.23605	0.239404	0.710256	0.743463	1034	9	461	58	65.9062	SIEMENS NM	149.459	0.427323	0.22892	0.347389	-1.05731	4836.93	459	876	261		2015-11-02	81.8893	100.368	0.945742	0.986368	0.728923	0.986368	0.103773	0.228959	0.651821	0.220751	0.238551	0.20295
0108672468			047Y	2015-01-14	63.3971	100.114	0.922361	0.931924	0.642492	0.931924	0.166483	0.234116	0.608231	0.236794	0.236116	0.237472	0.244295	0.244202	0.80598	0.804549	800	33	601	75	50.2812	SIEMENS NM	164.731	0.175215	0.233161	0.274552	-1.29261	5664.9	210	2073.52	81		2015-08-18	49.9564	100.074	0.943105	0.990998	0.782676	0.990998	0.129371	0.234116	0.587578	0.220476	0.237871	0.203081
1305622162			052Y	2014-12-19	68.3818	100.063	0.902622	0.984126	0.704948	0.984126	0.0927593	0.195248	0.57819	0.224747	0.210458	0.239037	0.234157	0.231016	0.693633	0.668526	779	7	936	77	47.375	SIEMENS NM	152.584	0.273038	0.197875	0.319869	-1.13984	11124.3	493	3517.3	283		2015-08-18	58.4606	100.077	0.872847	0.975598	0.639403	0.975598	0.171	0.195248	0.60792	0.223576	0.212171	0.234981
0712522107			062Y	2015-04-23	58.3811	100.113	0.942698	0.996445	0.761191	0.996445	0.18468	0.220858	0.525589	0.225607	0.223875	0.227339	0.235614	0.23526	0.706317	0.703165	750	1	606	80	47.2812	SIEMENS NM	163.809	0.197484	0.222273	0.204563	-1.58688	9347.2	456	3890.2	261		2015-11-10	55.6032	100.041	0.958133	0.991076	0.788786	0.991076	0.183167	0.220858	0.464889	0.216656	0.182342	0.25097
1207522023			065Y	2018-02-22	59.0863	100.148	0.843948	0.984968	0.614391	0.984968	0.132237	0.190918	0.539218	0.223412	0.214153	0.232671	0.239618	0.237932	0.745787	0.728213	789	16	842	76	48.9375	SIEMENS NM	147.243	0.129545	0.197077	0.257144	-1.35812	16817.9	458	6880.82	262		2018-10-09	53.7449	100.138	0.873997	0.978411	0.578396	0.978411	0.130765	0.190918	0.51113	0.225131	0.212203	0.238058
0309702305			047Y	2017-11-13	63.8099	100.061	0.920994	0.98711	0.612926	0.98711	0.146555	0.220728	0.818258	0.226365	0.222574	0.230157	0.234196	0.233385	0.693965	0.687196	705	2	1783	85	43.875	SIEMENS NM	160.544	0.196434	0.214123	0.283255	-1.26141	7102.03	457	2570.23	259		2018-07-16	57.4051	100.067	0.926352	0.978712	0.674227	0.978712	0.130646	0.220728	0.814985	0.23232	0.170308	0.294333
0201622246			055Y	2017-09-18	64.3125	99.9948	0.866036	0.979958	0.595576	0.979958	0.150716	0.230156	0.76548	0.225705	0.23267	0.21874	0.235069	0.236479	0.70148	0.714215	1071	24	779	56	66.875	SIEMENS NM	166.678	0.380034	0.225401	0.31129	-1.16703	8829.7	451	3151.1	263		2018-05-31	60.7736	100.043	0.866721	0.982518	0.489824	0.982518	0.175774	0.230156	0.687614	0.218832	0.230665	0.206999
1702585506			060Y	2018-02-28	58.9722	100.17	0.944199	0.979424	0.728883	0.979424	0.119282	0.217846	0.705897	0.220957	0.225111	0.216804	0.23997	0.240676	0.749666	0.757702	740	2	939	81	46.1875	SIEMENS NM	163.964	0.382387	0.218463	0.310605	-1.16923	11894	457	4879.84	267		2018-12-17	57.0427	100.202	0.856756	0.982363	0.590113	0.982363	0.132778	0.217846	0.464725	0.225147	0.194274	0.25602
1911712063			046Y	2018-06-05	59.4556	100.279	0.927487	0.981287	0.698012	0.981287	0.177118	0.209662	0.583378	0.221793	0.226378	0.217208	0.239306	0.240108	0.742412	0.751212	1000	2	531	60	61.6875	SIEMENS NM	162.945	0.367556	0.205621	0.306851	-1.18139	9997.27	448	4053.33	260		2019-01-08	61.54	100.582	0.893542	0.981889	0.696445	0.981889	0.145628	0.209662	0.562772	0.214619	0.207954	0.221284
0506742121			042Y	2017-02-17	60.2822	100.044	0.917007	0.984968	0.62501	0.984968	0.189092	0.235955	0.590609	0.222169	0.224968	0.21937	0.238193	0.238709	0.730834	0.736113	789	0	859	76	49.1875	SIEMENS NM	171.572	0.19344	0.236622	0.241905	-1.41921	7168.93	458	2847.34	262		2017-08-17	55.0409	100.044	0.965889	0.989708	0.749694	0.989708	0.140295	0.235955	0.648832	0.218025	0.177711	0.258338
1705935648			024Y	2018-03-05	62.3858	100.177	0.973227	0.984575	0.781134	0.984575	0.111399	0.225975	0.727787	0.221902	0.206776	0.237028	0.23945	0.236626	0.743958	0.715585	882	250	649	68	55.9375	SIEMENS NM	156.769	0.36232	0.225189	0.305531	-1.1857	6022.1	459	2265.17	265		2018-04-30	56.397	100.218	0.967461	0.986996	0.769353	0.986996	0.126879	0.225975	0.838513	0.226333	0.217137	0.235529
0806692103			048Y	2017-12-05	53.4409	100.239	0.96088	0.992152	0.736011	0.992152	0.188541	0.221317	0.605323	0.219485	0.233713	0.205258	0.239511	0.241879	0.744622	0.772272	869	29	615	69	54.1875	SIEMENS NM	163.475	0.186576	0.223839	0.268794	-1.31381	8791.94	451	4093.45	261		2018-10-29	48.533	100.21	0.950821	0.999202	0.795829	0.999202	0.190236	0.221317	0.510524	0.222872	0.243836	0.201909
2804662160			051Y	2017-09-13	58.4615	100.031	0.928259	0.985744	0.719512	0.985744	0.188817	0.230834	0.734527	0.219143	0.24266	0.195626	0.23605	0.240387	0.710256	0.754365	759	10	1713	79	46.9375	SIEMENS NM	165.418	0.459742	0.232358	0.321537	-1.13464	8284.62	456	3441.31	260		2018-03-06	51.1591	99.9667	0.968021	0.992152	0.801376	0.992152	0.22083	0.230834	0.650439	0.223338	0.247557	0.199119
1311612203			051Y	2012-11-22	59.0155	100.203	0.951484	0.986623	0.810608	0.986623	0.180065	0.222677	0.792599	0.216843	0.250298	0.183388	0.23605	0.241987	0.710256	0.773644	545	13	814	110	33.375	SIEMENS NM	163.386	0.234629	0.219834	0.270041	-1.30918	11591.5	456	4750.71	259		2013-06-17	64.5451	100.239	0.918979	0.981781	0.657225	0.981781	0.178864	0.222677	0.854256	0.218497	0.198941	0.238052
2503792189			038Y	2017-05-04	67.3756	100.259	0.908258	0.976073	0.633638	0.976073	0.073549	0.202421	0.592388	0.220248	0.221235	0.219262	0.240211	0.240379	0.752375	0.754281	1153	17	450	52	71.1875	SIEMENS NM	150.287	0.332232	0.205917	0.305184	-1.18684	7313.53	457	2386	270		2018-01-09	54.7392	100.233	0.948559	0.992267	0.763755	0.992267	0.0853082	0.202421	0.598161	0.236749	0.216102	0.257396
2603690949			047Y	2016-10-19	58.6703	99.9426	0.856686	0.978411	0.651392	0.978411	0.129111	0.231163	0.714838	0.22401	0.19579	0.25223	0.239774	0.234323	0.747496	0.695036	967	4	646	62	59.8438	SIEMENS NM	160.557	0.16299	0.228137	0.265676	-1.32548	12514	452	5172	265		2017-07-11	57.841	99.9188	0.823976	0.984835	0.543098	0.984835	0.157559	0.231163	0.758008	0.222464	0.257446	0.187482
2011642248			051Y	2016-04-01	54.8458	100.32	0.941778	0.983049	0.765518	0.983049	0.19531	0.217162	0.573748	0.221651	0.222444	0.220858	0.237178	0.23733	0.720823	0.722294	909	27	626	66	56.6562	SIEMENS NM	167.818	0.35224	0.224374	0.320576	-1.13763	10955	451	4946.65	260		2016-11-29	48.3471	100.34	0.957585	0.978712	0.75069	0.978712	0.160224	0.217162	0.632268	0.227803	0.240928	0.214678
2801672165			050Y	2018-01-17	57.1757	100.047	0.883143	0.983756	0.647808	0.983756	0.182953	0.216202	0.568384	0.22776	0.231775	0.223746	0.238154	0.238897	0.730436	0.738069	923	52	1256	65	57.1875	SIEMENS NM	165.873	0.177665	0.216297	0.255993	-1.3626	13191.1	454	5649	261		2018-07-23	56.0171	100.065	0.883178	0.986248	0.554834	0.986248	0.112569	0.216202	0.560438	0.217913	0.250629	0.185197
1305382307			074Y	2012-10-17	58.7147	100.118	0.965822	0.983465	0.87433	0.983465	0.17578	0.229781	0.794827	0.219843	0.222817	0.216869	0.238175	0.238721	0.730647	0.736239	895	4	207	67	55.9375	SIEMENS NM	164.682	0.332593	0.23052	0.202414	-1.59744	5489.43	450	2266.33	261		2013-04-02	52.3339	99.9562	0.928797	0.987584	0.672606	0.987584	0.151355	0.229781	0.651218	0.219537	0.205234	0.23384
0908742002			043Y	2018-07-24	54.7821	99.9864	0.950741	0.984701	0.634476	0.984701	0.148499	0.210503	0.461124	0.219534	0.241684	0.197384	0.237988	0.241805	0.728766	0.771339	769	2	1394	78	47.875	SIEMENS NM	165.23	0.162912	0.210345	0.247461	-1.3965	6185.6	454	2797	260		2018-09-12	50.0422	99.9681	0.946251	0.984964	0.678879	0.984964	0.151085	0.210503	0.595743	0.221411	0.219404	0.223419
0908402066			077Y	2018-07-25	58.3326	100.052	0.91655	0.981287	0.711931	0.981287	0.171893	0.218993	0.504491	0.222973	0.214485	0.231462	0.241265	0.239835	0.764689	0.748163	1000	350	632	60	48.5	SIEMENS NM	166.314	0.170217	0.217599	0.256128	-1.36208	9653.91	448	4022.53	262		2019-03-11	60.5365	100.094	0.842904	0.98404	0.579552	0.98404	0.191785	0.218993	0.539133	0.22739	0.215853	0.238926
3006742001			042Y	2017-04-05	56.8437	100.349	0.904117	0.984302	0.691688	0.984302	0.159642	0.227395	0.497716	0.217307	0.212203	0.222411	0.239468	0.238554	0.744154	0.734511	833	201	751	72	51.1875	SIEMENS NM	156.445	0.174513	0.223702	0.243074	-1.41439	14402.3	455	6215.52	262		2017-12-18	55.3251	100.49	0.896026	0.983899	0.665233	0.983899	0.162684	0.227395	0.530776	0.226428	0.186056	0.266801
0201700603			047Y	2017-12-20	55.5335	99.8998	0.927812	0.985485	0.74599	0.985485	0.158293	0.223065	0.78307	0.220763	0.217711	0.223816	0.239208	0.238657	0.741359	0.735574	882	8	846	68	54.3125	SIEMENS NM	163.76	0.192719	0.223726	0.26321	-1.3348	9210.3	459	4095.5	265		2018-07-30	53.6229	99.9584	0.933437	0.985744	0.743842	0.985744	0.129472	0.223065	0.787487	0.221834	0.229931	0.213737
2107532222			064Y	2018-05-15	60.6214	100.528	0.951636	0.992742	0.824934	0.992742	0.173843	0.192722	0.568088	0.219775	0.218323	0.221226	0.239306	0.239047	0.742414	0.739656	810	8	725	74	50.375	SIEMENS NM	160.721	0.394604	0.195936	0.306497	-1.18255	11771.1	449	4635.3	261		2019-02-01	62.082	100.321	0.937017	0.990918	0.747973	0.990918	0.173278	0.192722	0.507796	0.221084	0.21073	0.231438
0211592048			058Y	2018-07-31	57.0513	100.066	0.960539	0.992289	0.836101	0.992289	0.141442	0.225829	0.732095	0.222319	0.255589	0.189049	0.234608	0.240857	0.697477	0.759821	705	34	1028	85	43.5625	SIEMENS NM	160.428	0.34753	0.225887	0.300369	-1.20274	7632.92	455	3278.24	260		2019-07-09	58.8143	100.134	0.941253	0.984162	0.729539	0.984162	0.190085	0.225829	0.770093	0.219594	0.22442	0.214769
2307572228			060Y	2018-01-11	67.8614	100.118	0.938349	0.988195	0.705335	0.988195	0.189331	0.248465	0.659009	0.215279	0.197436	0.233123	0.238956	0.235561	0.738688	0.705841	967	0	604	62	59.5625	SIEMENS NM	165.411	0.195848	0.249381	0.196097	-1.62915	6999.07	454	2249.4	264		2018-08-02	61.1194	100.055	0.90077	0.983899	0.547189	0.983899	0.195718	0.248465	0.551383	0.220255	0.200012	0.240498
2607402042			078Y	2018-08-06	61.8319	100.228	0.944901	0.983493	0.73264	0.983493	0.159299	0.217094	0.730954	0.223759	0.230778	0.216739	0.239174	0.2404	0.740996	0.754519	909	13	870	66	56.125	SIEMENS NM	159.929	0.401758	0.210124	0.327115	-1.11744	9765.56	457	3727.33	263		2019-05-09	62.0992	100.214	0.844745	0.988601	0.591902	0.988601	0.180944	0.217094	0.601056	0.214414	0.204727	0.2241
0804512213			062Y	2014-01-21	53.2085	100.242	0.916446	0.99131	0.685842	0.99131	0.150293	0.202674	0.48019	0.222005	0.213556	0.230453	0.239174	0.237615	0.740996	0.725075	750	5	974	80	46.75	SIEMENS NM	164.05	0.157439	0.20486	0.248661	-1.39167	15478.2	456	7242.47	264		2017-10-26	52.9193	100.079	0.922718	0.991618	0.731632	0.991618	0.17389	0.202674	0.501075	0.22189	0.218916	0.224864
2706482087			064Y	2013-01-23	64.6488	100.322	0.901663	0.983493	0.634677	0.983493	0.180686	0.228936	0.500635	0.222935	0.213819	0.232052	0.240967	0.239404	0.761115	0.743463	937	36	491	64	53.6875	SIEMENS NM	158.328	0.183603	0.227429	0.1742	-1.74755	9138.03	457	3230.4	264		2014-01-22	52.2767	100.13	0.932624	0.990103	0.707271	0.990103	0.155608	0.228936	0.549805	0.226275	0.245655	0.206894
1107675936			070Y	2013-06-12	58.4561	99.6606	0.847234	0.993154	0.596843	0.993154	0.155525	0.220578	0.477094	0.222015	0.225646	0.218383	0.237863	0.238538	0.727523	0.734347	895	22	600	67	53.5625	SIEMENS NM	164.899	0.212888	0.219394	0.245802	-1.40323	16720.8	452	6946.46	259		2014-09-15	25.9974	99.6878	0.969223	0.921514	0.830738	0.921514	0.174613	0.220578	0.465952	0.228738	0.218873	0.238604
2012422063			070Y	2013-06-12	59.5666	100.096	0.822654	0.983756	0.548107	0.983756	0.176968	0.231009	0.471711	0.223065	0.221194	0.224936	0.239336	0.239001	0.742736	0.739168	895	22	600	67	53.5625	SIEMENS NM	167.226	0.206866	0.229251	0.241029	-1.42284	16851.4	454	6813.6	261		2014-06-16	54.8523	100.074	0.868697	0.984439	0.680564	0.984439	0.208919	0.231009	0.455224	0.226002	0.220634	0.23137
2805512049			062Y	2013-11-12	54.7128	100.315	0.873342	0.970951	0.591232	0.970951	0.130071	0.224718	0.466593	0.227846	0.204681	0.25101	0.240597	0.236316	0.756788	0.712703	1034	2	520	58	62.6562	SIEMENS NM	150.608	0.285739	0.219426	0.316324	-1.15099	17114.3	455	7750.59	273		2014-01-20	52.4469	100.678	0.870827	0.972966	0.596444	0.972966	0.125819	0.224718	0.463464	0.218554	0.211178	0.225931
0711312060			080Y	2012-08-09	57.432	99.9404	0.874848	0.995266	0.697299	0.995266	0.196452	0.227088	0.516363	0.226142	0.234389	0.217895	0.237885	0.2394	0.727738	0.743416	967	0	681	62	60.125	SIEMENS NM	164.886	0.198373	0.218598	0.214585	-1.53905	16027.1	457	6822.43	258		2013-02-04	54.8741	99.9668	0.885049	0.985097	0.713029	0.985097	0.188624	0.227088	0.593277	0.222667	0.225362	0.219972
0609772260			035Y	2013-03-08	58.4848	100.224	0.91837	0.990103	0.672858	0.990103	0.150945	0.219174	0.413731	0.22034	0.203278	0.237402	0.239947	0.236809	0.749412	0.717315	833	50	479	72	48.8125	SIEMENS NM	157.535	0.176002	0.214552	0.230668	-1.46678	10874.4	453	4514.53	259		2013-10-28	57.764	100.233	0.888345	0.986248	0.656112	0.986248	0.0808551	0.219174	0.421308	0.227585	0.209221	0.245949
0302502106			062Y	2013-01-10	56.0071	100.044	0.873036	0.981186	0.604939	0.981186	0.14382	0.229115	0.606053	0.222451	0.265378	0.179523	0.233637	0.241684	0.689273	0.769828	952	35	1625	63	58.7188	SIEMENS NM	154.85	0.157005	0.2325	0.244213	-1.40971	11705.8	453	5149.74	263		2013-09-27	53.187	100.018	0.890669	0.984968	0.594335	0.984968	0.128475	0.229115	0.638147	0.218501	0.177442	0.259559
1003635458			050Y	2013-05-01	53.711	100.347	0.94135	0.99131	0.727151	0.99131	0.212108	0.227586	0.575499	0.223136	0.239896	0.206375	0.238203	0.241139	0.730932	0.763167	652	7	1003	92	41.75	SIEMENS NM	172.208	0.204263	0.228107	0.258735	-1.35195	10475.5	456	4849	258		2014-01-30	55.6069	100.308	0.941797	0.988195	0.696433	0.988195	0.206333	0.227586	0.460931	0.216927	0.199817	0.234038
2810522049			060Y	2012-12-14	61.2177	100.294	0.937563	0.982934	0.659909	0.982934	0.173261	0.222096	0.580428	0.216955	0.225564	0.208346	0.234838	0.236565	0.699464	0.715016	821	16	1172	73	51.8438	SIEMENS NM	166.176	0.363119	0.217993	0.318416	-1.1444	9805.04	456	3802.62	263		2014-01-30	58.4353	100.216	0.875737	0.985228	0.546591	0.985228	0.190211	0.222096	0.516932	0.219365	0.19432	0.24441
1303502364			063Y	2014-02-05	62.7069	100.017	0.907096	0.979326	0.591419	0.979326	0.185688	0.216263	0.67726	0.224472	0.240331	0.208614	0.237916	0.24074	0.728055	0.758452	1132	180	1043	53	70.375	SIEMENS NM	159.883	0.198466	0.21057	0.199838	-1.61025	8055.03	450	3003.97	263		2014-07-09	56.4995	100.016	0.93777	0.984968	0.611482	0.984968	0.13975	0.216263	0.640027	0.230426	0.228274	0.232579
1109322100			081Y	2014-02-06	57.3885	100.09	0.928684	0.999944	0.669497	0.999944	0.183824	0.205365	0.436199	0.216208	0.202438	0.229977	0.238732	0.236123	0.736348	0.710924	1153	2	461	52	71.0312	SIEMENS NM	158.512	0.185822	0.208569	0.178237	-1.72464	15800	454	6732.63	258		2014-06-02	58.5795	100.156	0.894915	0.997279	0.741796	0.997279	0.125053	0.205365	0.548313	0.21577	0.211536	0.220005
0210562498			057Y	2014-02-07	55.622	100.194	0.878471	0.991155	0.670051	0.991155	0.169987	0.205622	0.589287	0.223537	0.225741	0.221332	0.238154	0.238562	0.730432	0.734591	869	6	639	69	53.9062	SIEMENS NM	158.386	0.216082	0.208337	0.245155	-1.40586	12147.7	452	5390.9	256		2014-08-11	51.0969	100.293	0.921151	0.997859	0.71031	0.997859	0.172484	0.205622	0.522809	0.223741	0.219521	0.227962
0412656272			047Y	2013-07-12	64.0875	99.9048	0.852491	0.988401	0.669199	0.988401	0.153655	0.21754	0.66393	0.215517	0.205559	0.225475	0.239136	0.237303	0.740595	0.722029	659	6	1046	91	41.3125	SIEMENS NM	160.443	0.159538	0.218153	0.257179	-1.35798	11584	458	4160.09	258		2014-02-20	64.9591	99.9318	0.79076	0.982783	0.507895	0.982783	0.147601	0.21754	0.628696	0.220027	0.192427	0.247626
2801502162			062Y	2012-11-15	63.0535	100.164	0.90739	0.999582	0.716872	0.999582	0.191865	0.214083	0.643906	0.219953	0.18944	0.250466	0.239594	0.233651	0.745521	0.689392	857	188	553	70	55.6563	SIEMENS NM	164.328	0.20401	0.213676	0.182138	-1.70299	10025.9	457	3704.24	263		2013-11-25	55.6331	100.14	0.865641	0.988048	0.642439	0.988048	0.169116	0.214083	0.534151	0.221681	0.210832	0.232531
2704682224			044Y	2012-08-13	65.0073	100.162	0.842915	0.982934	0.531378	0.982934	0.165785	0.23844	0.64258	0.222089	0.217549	0.226629	0.240582	0.239805	0.756613	0.747834	882	25	1278	68	57	SIEMENS NM	167.639	0.180201	0.241923	0.249599	-1.3879	10395	456	3637.49	263		2013-04-08	61.5132	100.139	0.95675	0.98075	0.596829	0.98075	0.11722	0.23844	0.629154	0.220501	0.241553	0.199449
0206792107			033Y	2012-10-22	61.8901	100.349	0.949311	0.988401	0.651518	0.988401	0.131635	0.220657	0.679096	0.221447	0.20136	0.241534	0.240056	0.236334	0.750632	0.712873	1000	28	557	60	57.7813	SIEMENS NM	160.778	0.183895	0.22926	0.245104	-1.40607	7090.8	458	2702.3	263		2013-10-04	55.8485	100.256	0.936513	0.987222	0.733805	0.987222	0.0493076	0.220657	0.580181	0.225502	0.232668	0.218336
1312602406			052Y	2013-05-22	60.3788	100.092	0.909253	0.984835	0.681057	0.984835	0.214982	0.230035	0.612072	0.230681	0.224742	0.23662	0.239774	0.238702	0.747496	0.736043	714	0	845	84	44.3438	SIEMENS NM	164.572	0.219963	0.226564	0.238619	-1.43289	9517	456	3770.75	261		2014-03-03	57.5852	100.035	0.8933	0.984701	0.610361	0.984701	0.0879296	0.230035	0.575398	0.223169	0.196331	0.250006
3101422000			070Y	2012-09-17	60.1022	100.079	0.853182	0.993491	0.647849	0.993491	0.118115	0.249155	0.624556	0.222066	0.221464	0.222668	0.240211	0.240108	0.752375	0.751212	1052	10	833	57	65.0938	SIEMENS NM	148.454	0.1261	0.248316	0.197694	-1.62103	14370.2	453	5733.4	261		2013-07-02	59.8618	100.053	0.849446	0.979242	0.631268	0.979242	0.175176	0.249155	0.696568	0.218955	0.235866	0.202045
2202632026			049Y	2013-02-06	57.1475	99.9391	0.894105	0.986368	0.695537	0.986368	0.180068	0.230818	0.766118	0.221206	0.224542	0.21787	0.23956	0.24014	0.745155	0.751566	779	24	866	77	48.5625	SIEMENS NM	165.191	0.187813	0.235786	0.278349	-1.27888	12733	459	5456.41	261		2013-12-23	56.7069	100.282	0.873589	0.982207	0.603832	0.982207	0.175592	0.230818	0.670058	0.221103	0.227466	0.214739
2709602148			052Y	2013-07-23	61.5212	100.22	0.885499	0.984565	0.619945	0.984565	0.200757	0.248298	0.500486	0.220983	0.217559	0.224407	0.237652	0.236996	0.725433	0.719084	857	4	564	70	54.1562	SIEMENS NM	157.281	0.197298	0.248216	0.228789	-1.47496	11201.9	452	4310.34	262		2014-04-28	59.6674	100.171	0.896601	0.990276	0.658682	0.990276	0.226909	0.248298	0.518877	0.223396	0.214872	0.231921
2801502162			062Y	2012-11-15	63.9736	100.143	0.913605	0.996736	0.728389	0.996736	0.200888	0.204369	0.62227	0.222335	0.196185	0.248485	0.239619	0.234584	0.745794	0.697269	857	188	553	70	55.6563	SIEMENS NM	166.211	0.212365	0.20007	0.1836	-1.695	9337.22	461	3363.86	263		2013-11-25	56.4135	100.12	0.857256	0.97887	0.61664	0.97887	0.14056	0.204369	0.582101	0.21903	0.214929	0.223131
[truncated: 23 more columns]

## Sheet: MMWF
patient ID				Parameters
				pre-therapy																																	post-therapy
	BMI	chemocare record	age	date	LVEF%	LVEFPhase	Synchrony	SynchronyMaxMin	Entropy	EntropyMaxMin	App_Entropy	App_EntropyMaxMin	LHR	Average FS	LA FS	SA FS	Circulatory diastole	Circulatory Systole	Elongation Diastole	Elongation systole	(mean RR duration)	rejected beats	Accepted beats	Heart rate	frame time	Manufacturer	Phase	BoundApEn	BoundApEnMaxMin	ε	Log(ε)	Max Count	Max Pixel Num	Min Count	Min Pixel Num	kinetics	date	LVEF%	LVEF_Phase%	Synchrony	SynchronyMaxMin	Entropy	EntropyMaxMin	App_Entropy	App_EntropyMaxMin	LHR	Average FS	LA FS	SA FS
0312542186			060Y	2015-04-13	87.9014	100.038	0.938301	0.999822	0.790738	0.999822	0.158272	0.233076	0.533944	0.221302	0.189065	0.253538	0.244755	0.239878	0.813299	0.748638	645	0	1319	93	39.9375	SIEMENS NM	171.899	0.161326	0.227522	0.26937	-1.31167	2820.79	382	341.276	206		2015-08-17	49.8886	100.007	0.931933	0.990408	0.870924	0.990408	0.169671	0.233076	0.477929	0.235566	0.249132	0.222
3008822223			032Y	2014-10-21	62.6517	100.123	0.891272	0.997079	0.792746	0.997079	0.144313	0.230897	0.708638	0.246488	0.224575	0.268401	0.241805	0.237886	0.771343	0.727747	1153	107	492	52	73.9375	SIEMENS NM	171.338	0.59227	0.228524	0.311269	-1.1671	9730.71	393	3634.25	217		2015-01-15	61.9879	100.114	0.929513	0.999995	0.868726	0.999995	0.170033	0.230897	0.783363	0.234588	0.285543	0.183632
0107652005			049Y	2014-08-04	66.2637	100.158	0.945942	0.999516	0.888578	0.999516	0.189413	0.245821	0.84444	0.228155	0.212569	0.243741	0.243196	0.240746	0.789779	0.758514	722	27	805	83	42.8125	SIEMENS NM	171.267	0.597802	0.258471	0.288205	-1.24408	5660.27	386	1909.57	209		2015-01-19	55.8345	100.106	0.923009	0.999706	0.87656	0.999706	0.104963	0.245821	0.728147	0.251781	0.262672	0.240889
1506830862			031Y	2014-12-15	70.1018	100.105	0.941282	0.997397	0.865807	0.997397	0.124209	0.236562	0.718802	0.217206	0.208852	0.225561	0.239585	0.238079	0.745422	0.729679	759	36	865	79	46.9375	SIEMENS NM	157.841	0.578942	0.235185	0.286015	-1.25171	6389.47	383	1910.33	205		2014-12-15	70.1018	100.105	0.941282	0.997397	0.865807	0.997397	0.124209	0.236562	0.74294	0.217206	0.208852	0.225561
1509631046			049Y	2012-10-23	61.2457	100.042	0.906209	0.996956	0.845366	0.996956	0.118556	0.222903	0.80883	0.255659	0.281464	0.229855	0.241865	0.245588	0.772105	0.827563	1111	74	985	54	69.4375	SIEMENS NM	157.183	0.572245	0.257448	0.308877	-1.17481	10483.8	385	4062.93	212		2015-07-24	60.2976	100.081	0.834447	0.984294	0.729622	0.984294	0.131079	0.222903	0.607962	0.260499	0.256054	0.264945
0801792207			036Y	2015-10-02	59.7001	100.1	0.954549	0.999826	0.863798	0.999826	0.0959917	0.242905	0.651859	0.262834	0.26113	0.264537	0.243234	0.242972	0.79031	0.786666	1052	111	534	57	67.375	SIEMENS NM	162.975	0.601371	0.244909	0.298517	-1.20893	5465.93	386	2202.77	211		2015-11-09	60.3984	100.371	0.948171	0.999317	0.829402	0.999317	0.138752	0.242905	0.617297	0.230038	0.200709	0.259368
2111652148			047Y	2013-01-22	64.3576	100.013	0.896838	0.998916	0.823321	0.998916	0.172909	0.252731	0.665319	0.272624	0.275687	0.269561	0.240587	0.241131	0.756674	0.763075	833	2	717	72	51.8125	SIEMENS NM	159.507	0.277295	0.255168	0.242053	-1.4186	10010.4	387	3567.93	211		2013-10-21	56.6687	100.035	0.899845	0.99931	0.838062	0.99931	0.180096	0.252731	0.684396	0.244674	0.264133	0.225214
1302522183			061Y	2013-05-09	66.8117	100.003	0.93214	0.996449	0.762066	0.996449	0.136752	0.245022	0.884433	0.261878	0.240282	0.283475	0.243052	0.23936	0.787777	0.742989	895	33	1056	67	57.2812	SIEMENS NM	160.771	0.267943	0.259326	0.243572	-1.41234	6451.43	385	2141.12	207		2014-08-18	73.1378	100.169	0.934555	0.985228	0.788277	0.985228	0.13787	0.245022	1.07181	0.239382	0.255843	0.222922
1909472174			066Y	2014-08-20	70.4216	100.108	0.912641	0.998786	0.82483	0.998786	0.0834028	0.238934	0.543623	0.236373	0.218752	0.253995	0.246115	0.243878	0.837408	0.799633	740	0	552	81	45.125	SIEMENS NM	158.071	0.611711	0.238092	0.295896	-1.21775	8186.66	390	2421.48	208		2014-11-24	75.9221	100.183	0.926624	0.999925	0.825187	0.999925	0.15539	0.238934	0.615972	0.225866	0.227022	0.224711
2401402012			075Y	2015-05-26	57.2429	99.9662	0.909272	0.99721	0.845437	0.99721	0.174631	0.237301	0.534013	0.253324	0.291641	0.215007	0.237275	0.243893	0.721767	0.799852	689	44	855	87	42.75	SIEMENS NM	162.025	0.543567	0.237603	0.264225	-1.33095	10856.1	386	4641.75	210		2015-08-06	62.3001	100.041	0.916964	0.998773	0.797627	0.998773	0.227023	0.237301	0.588124	0.212925	0.207496	0.218353
0603552064			061Y	2016-06-27	60.1711	100.056	0.954891	0.997853	0.872907	0.997853	0.0946815	0.23709	0.911014	0.253316	0.216827	0.289804	0.24486	0.238993	0.815026	0.739081	1016	19	638	59	62.875	SIEMENS NM	154.657	0.597056	0.235284	0.284234	-1.25796	7987.28	385	3181.24	210		2016-11-28	59.3617	99.9159	0.946954	0.999957	0.832484	0.999957	0.201039	0.23709	0.917633	0.248633	0.231967	0.265298
2910525244			062Y	2015-08-10	65.5033	100.213	0.94051	0.971234	0.90833	0.971234	0.155993	0.254683	0.67575	0.283854	0.295114	0.272594	0.235671	0.238052	0.706829	0.729412	882	0	604	68	56.125	SIEMENS NM	156.09	0.513569	0.247831	0.278018	-1.28007	11624.2	408	4009.97	247		2017-02-01	73.1516	100.226	0.880694	0.99403	0.761176	0.99403	0.135483	0.254683	0.647937	0.261579	0.270293	0.252865
0805745688			041Y	2015-05-15	56.1558	100.027	0.977019	0.997939	0.96409	0.997939	0.176067	0.257995	0.60916	0.234974	0.208438	0.261511	0.245294	0.241473	0.822359	0.767222	769	8	535	78	47.3125	SIEMENS NM	164.6	0.521011	0.255433	0.250017	-1.38623	7002.3	393	3070.1	211		2016-04-11	59.4329	100.077	0.908919	0.99961	0.835185	0.99961	0.177865	0.257995	0.653417	0.234205	0.250478	0.217931
0709592086			055Y	2014-11-10	64.9222	100.217	0.941391	0.999957	0.84694	0.999957	0.150885	0.256091	0.601637	0.237464	0.237907	0.237022	0.245144	0.2452	0.819783	0.820735	952	30	571	63	59.75	SIEMENS NM	165.891	0.589111	0.243078	0.287169	-1.24768	7699.94	387	2700.97	209		2016-06-08	60.8067	100.222	0.931263	0.999995	0.834995	0.999995	0.113884	0.256091	0.530139	0.223177	0.262927	0.183427
2712910923			026Y	2018-08-15	66.8277	100.014	0.904476	0.996792	0.837691	0.996792	0.120309	0.237938	0.606083	0.246084	0.259628	0.23254	0.237327	0.239882	0.722265	0.748691	833	17	632	72	51.75	SIEMENS NM	166.54	0.344639	0.251026	0.277454	-1.2821	7429.36	390	2464.49	213		2019-01-09	61.0019	100.049	0.898224	0.998927	0.830568	0.998927	0.098495	0.237938	0.587493	0.234275	0.22483	0.24372
2106750625			037Y	2013-03-22	67.1607	100.503	0.990845	0.99721	0.964573	0.99721	0.251966	0.257987	0.608296	0.236081	0.281968	0.190194	0.23777	0.245125	0.726599	0.819467	779	67	908	77	49.6875	SIEMENS NM	175.196	0.452317	0.250924	0.221632	-1.50674	5919.73	386	1944	210		2014-03-07	51.4662	100.14	0.986728	0.966273	0.966166	0.966273	0.206393	0.257987	0.699806	0.225445	0.210995	0.239895
1810672082			045Y	2012-11-12	67.314	100.044	0.941825	0.99721	0.856734	0.99721	0.140941	0.257952	0.798891	0.220147	0.221622	0.218673	0.239505	0.239763	0.744554	0.747375	833	51	613	72	47.2188	SIEMENS NM	156.026	0.569	0.244331	0.291153	-1.23391	7246.93	386	2368.73	209		2013-06-27	61.5176	100.029	0.936234	0.998905	0.830426	0.998905	0.11742	0.257952	0.789964	0.256945	0.249457	0.264433
1810792169			037Y	2017-06-29	58.3849	99.9664	0.954093	0.999169	0.878772	0.999169	0.253294	0.234877	0.80844	0.236656	0.230214	0.243098	0.243818	0.242877	0.79874	0.785372	759	1	968	79	46.8125	SIEMENS NM	175.659	0.245563	0.236253	0.216155	-1.53176	6700.31	383	2788.34	209		2018-03-08	58.4133	99.9678	0.945008	0.999882	0.85576	0.999882	0.226936	0.234877	0.818867	0.236922	0.248042	0.225802
0808582232			057Y	2016-06-02	44.7605	99.919	0.984787	0.954196	0.961955	0.954196	0.141974	0.23068	0.453682	0.22607	0.188214	0.263926	0.246131	0.240837	0.837716	0.759586	659	89	662	91	40.9688	SIEMENS NM	164.406	0.136949	0.252306	0.208023	-1.57011	13595.2	387	7509.91	209		2017-04-18	46.9397	99.9193	0.965239	0.995318	0.929102	0.995318	0.217413	0.23068	0.485418	0.2206	0.250379	0.19082
1909612022			056Y	2017-11-30	59.4871	99.89	0.879265	0.996449	0.779049	0.996449	0.130212	0.237067	0.765873	0.26456	0.263195	0.265926	0.241004	0.240764	0.761556	0.758734	1111	80	854	54	69.1875	SIEMENS NM	160.388	0.518534	0.229984	0.318364	-1.14456	10602.3	385	4295.29	212		2018-07-02	58.697	99.9111	0.882567	0.99783	0.739335	0.99783	0.146283	0.237067	0.734106	0.231705	0.206091	0.257318
2608472060			070Y	2018-07-03	58.6557	99.9031	0.901378	0.996161	0.798867	0.996161	0.26742	0.234228	0.559344	0.22516	0.248789	0.201531	0.243049	0.246109	0.787737	0.837294	1000	35	818	60	62.5625	SIEMENS NM	168.415	0.255579	0.234916	0.215443	-1.53506	10286.2	384	4252.77	211		2019-04-01	57.4119	99.9214	0.898227	0.999696	0.774092	0.999696	0.263092	0.234228	0.732192	0.235078	0.215667	0.25449
0711782164			037Y	2016-10-14	72.7264	100.118	0.940224	0.997477	0.84033	0.997477	0.182116	0.244783	0.710506	0.260157	0.290997	0.229318	0.239084	0.244194	0.740045	0.804424	740	67	767	81	42.5	SIEMENS NM	172.086	0.260035	0.242229	0.279727	-1.27394	5283.5	389	1441	212		2017-01-16	69.1461	100.171	0.950508	0.995366	0.875692	0.995366	0.122887	0.244783	0.682511	0.251755	0.237917	0.265593
2807542042			061Y	2016-06-29	53.3392	99.9971	0.959424	0.995593	0.900091	0.995593	0.246337	0.253131	0.517511	0.233635	0.228005	0.239265	0.241291	0.240341	0.765003	0.753845	652	7	1239	92	40.5625	SIEMENS NM	170.5	0.242852	0.25128	0.187966	-1.6715	9993.53	384	4663.06	207		2017-01-24	44.1485	99.9543	0.98759	0.920045	0.978577	0.920045	0.184822	0.253131	0.45714	0.246199	0.234065	0.258333
0705792129			036Y	2015-09-10	65.1267	100.009	0.903505	0.994749	0.765268	0.994749	0.163356	0.237843	0.864731	0.244121	0.268267	0.219976	0.236554	0.241049	0.714912	0.762093	952	21	607	63	58.125	SIEMENS NM	155.461	0.186387	0.236021	0.229646	-1.47122	7143	387	2491	215		2016-05-19	57.1509	99.9586	0.883892	0.999429	0.716964	0.999429	0.14857	0.237843	0.944601	0.238632	0.23623	0.241033
3009612133			055Y	2017-01-27	79.8054	100.149	0.969546	0.999303	0.895681	0.999303	0.154623	0.266588	0.529154	0.200086	0.168089	0.232083	0.238786	0.232522	0.736909	0.680222	705	7	743	85	43.6875	SIEMENS NM	170.608	0.56853	0.254828	0.282285	-1.26484	4823.73	386	974.133	212		2017-06-06	75.6677	100.155	0.947688	0.998927	0.896573	0.998927	0.157686	0.266588	0.459277	0.23095	0.247987	0.213913
1908592109			057Y	2017-01-27	61.8851	100.015	0.963487	0.999995	0.907947	0.999995	0.16123	0.230606	0.847447	0.224358	0.261215	0.187501	0.236713	0.24306	0.716402	0.787883	750	23	728	80	46.9375	SIEMENS NM	166.253	0.534324	0.229603	0.289505	-1.23958	6481.8	393	2470.53	212		2017-05-25	52.7087	99.9882	0.971094	0.992135	0.906223	0.992135	0.179766	0.230606	0.685299	0.21559	0.193357	0.237823
1308512023			064Y	2016-07-18	55.2954	100.021	0.88001	0.998083	0.801189	0.998083	0.158003	0.254505	0.621341	0.213484	0.216645	0.210323	0.24345	0.243888	0.793383	0.799787	810	0	752	74	50.2812	SIEMENS NM	159.474	0.216616	0.249357	0.241913	-1.41918	11914.4	388	5326.29	211		2017-04-04	55.028	100.011	0.916961	0.999995	0.842584	0.999995	0.127546	0.254505	0.597157	0.238795	0.256042	0.221547
0404502067			066Y	2016-06-01	55.0402	99.9552	0.9374	0.998622	0.912866	0.998622	0.26988	0.254344	0.583813	0.241835	0.27417	0.209501	0.237939	0.243435	0.728284	0.793172	789	2	867	76	49.625	SIEMENS NM	168.024	0.256095	0.25048	0.211255	-1.55469	11210.3	389	5040.13	208		2017-02-20	56.5159	99.9634	0.947523	0.999827	0.886038	0.999827	0.130948	0.254344	0.560315	0.2216	0.224332	0.218868
1406432334			073Y	2017-02-21	64.7537	99.9013	0.896384	0.998278	0.78812	0.998278	0.221597	0.241007	0.629094	0.220358	0.216246	0.22447	0.242263	0.24162	0.777191	0.769036	923	5	754	65	57.3125	SIEMENS NM	173.106	0.216828	0.238749	0.232951	-1.45693	7069.97	389	2491.9	207		2017-08-23	59.325	99.8763	0.897483	0.997939	0.78558	0.997939	0.233037	0.241007	0.629369	0.238405	0.275902	0.200909
1603472282			065Y	2012-10-24	58.9732	100.286	0.974887	0.999764	0.977113	0.999764	0.228158	0.219243	0.495392	0.413857	0.453759	0.373955	0.225159	0.237042	0.627806	0.719526	1016	0	323	59	62.625	SIEMENS NM	178.154	0.407228	0.216303	0.16706	-1.7894	7889.56	387	3236.84	207		2013-03-15	57.0418	100.098	0.841115	0.999303	0.744201	0.999303	0.143302	0.219243	0.49978	0.243432	0.211232	0.275632
2610542364			061Y	2015-12-14	64.2046	99.9291	0.921757	0.996691	0.836951	0.996691	0.167376	0.248364	1.00817	0.223803	0.206907	0.240699	0.24199	0.239148	0.773688	0.740722	895	1	783	67	55.2188	SIEMENS NM	162.213	0.396663	0.235044	0.265369	-1.32664	8280.4	384	2964	210		2016-08-15	64.3831	99.9575	0.936351	0.99768	0.848105	0.99768	0.0794584	0.248364	0.98691	0.269531	0.207886	0.331176
1705552188			060Y	2016-01-27	52.6621	99.9465	0.974153	0.987004	0.934277	0.987004	0.195053	0.248773	0.536955	0.230851	0.258062	0.20364	0.236338	0.241307	0.712906	0.765199	821	10	884	73	50.25	SIEMENS NM	166.801	0.204672	0.263667	0.185447	-1.68499	10829.3	388	5126.37	204		2016-10-17	54.9596	99.9817	0.89617	0.999771	0.828574	0.999771	0.141697	0.248773	0.676019	0.240896	0.222734	0.259059
2601712147			044Y	2015-12-17	62.6484	100.049	0.864786	0.99907	0.715896	0.99907	0.182684	0.239167	0.637858	0.238316	0.291619	0.185012	0.23811	0.24624	0.729996	0.839856	1176	34	452	51	73.3125	SIEMENS NM	167.583	0.245315	0.248646	0.225161	-1.49094	11206	390	4185.63	210		2016-09-09	59.543	100.036	0.814262	0.999924	0.691009	0.999924	0.132777	0.239167	0.569612	0.236001	0.273398	0.198603
1511788089			038Y	2017-02-27	78.2848	100.279	0.934026	0.990244	0.79537	0.990244	0.103975	0.238814	0.68074	0.255621	0.260392	0.25085	0.241905	0.24267	0.772601	0.782568	923	71	517	65	57.3125	SIEMENS NM	162.459	0.482297	0.267115	0.270574	-1.30721	6503.6	396	1412.27	221		2017-09-21	72.7669	100.296	0.9359	0.999984	0.825147	0.999984	0.151725	0.238814	0.593069	0.256799	0.287068	0.226529
1211962164			019Y	2016-10-18	60.6087	100.07	0.892518	0.999762	0.791654	0.999762	0.227911	0.247268	0.631438	0.251308	0.287753	0.214863	0.238759	0.244676	0.736632	0.812018	759	96	860	79	47.0938	SIEMENS NM	178.48	0.370426	0.262515	0.246854	-1.39896	8711.28	385	3431.49	208		2017-02-06	58.2328	100.073	0.931433	0.999957	0.77101	0.999957	0.224237	0.247268	0.642965	0.254877	0.258771	0.250984
2009735943			043Y	2016-10-05	58.1504	100.083	0.927522	0.999956	0.876746	0.999956	0.216544	0.253935	0.605971	0.219333	0.189194	0.249471	0.243586	0.238718	0.795334	0.736207	833	2	774	72	52.8438	SIEMENS NM	169.927	0.254449	0.252852	0.237487	-1.43764	9151.68	383	3829.94	211		2017-02-27	57.65	100.091	0.939636	0.998927	0.871375	0.998927	0.138164	0.253935	0.537986	0.270753	0.19495	0.346555
1110602081			056Y	2017-02-28	61.508	99.9781	0.859973	0.996988	0.761297	0.996988	0.189717	0.213213	0.727337	0.241239	0.230994	0.251483	0.237158	0.235064	0.72064	0.701439	631	4	1433	95	39.375	SIEMENS NM	167.438	0.501956	0.258082	0.268956	-1.31321	10253.4	387	3946.73	209		2017-11-21	51.779	99.9075	0.913775	0.999317	0.853312	0.999317	0.183996	0.213213	0.524115	0.242015	0.252754	0.231276
1104702460			046Y	2017-03-02	63.0534	99.9673	0.931012	0.992924	0.810791	0.992924	0.0989685	0.231138	0.753435	0.220857	0.228263	0.213451	0.23728	0.238666	0.721815	0.735668	1000	106	483	60	63.125	SIEMENS NM	164.533	0.461015	0.224591	0.3326	-1.10081	7517.47	384	2777.45	216		2017-10-02	59.2453	99.9962	0.872963	0.997853	0.792575	0.997853	0.17701	0.231138	0.702603	0.255305	0.243691	0.266919
1701622424			054Y	2016-10-27	64.2015	99.9177	0.958175	0.998636	0.909005	0.998636	0.214995	0.250369	0.518129	0.247756	0.253792	0.241719	0.240017	0.241068	0.750184	0.762322	759	19	626	79	48.0938	SIEMENS NM	166.622	0.212631	0.241861	0.198857	-1.61517	7813.17	391	2797	212		2017-03-02	68.1802	99.9114	0.938621	0.999202	0.879209	0.999202	0.102816	0.250369	0.555519	0.249893	0.237651	0.262135
2406552209			061Y	2016-08-02	56.8278	100.011	0.95409	0.999995	0.88308	0.999995	0.240682	0.2188	0.630838	0.228083	0.227944	0.228221	0.243173	0.243153	0.789459	0.789176	857	0	698	70	53.7188	SIEMENS NM	166.135	0.247877	0.219026	0.204066	-1.58931	8934.13	385	3857.06	208		2017-06-05	61.6855	100.014	0.931129	0.99931	0.808324	0.99931	0.188371	0.2188	0.618623	0.229693	0.261612	0.197774
1701522152			063Y	2015-07-29	78.2533	99.9387	0.81275	0.992662	0.703288	0.992662	0.129139	0.244915	0.645751	0.249149	0.262389	0.235909	0.238534	0.240929	0.734304	0.760666	895	2	530	67	54.7188	SIEMENS NM	158.573	0.205069	0.246012	0.241777	-1.41974	8074.7	387	1755.98	213		2016-05-30	66.7159	99.9279	0.852769	0.993114	0.733738	0.993114	0.145886	0.244915	0.851152	0.222015	0.173431	0.2706
0105582239			056Y	2014-10-03	62.3357	99.96	0.902199	0.997503	0.638097	0.997503	0.15586	0.236124	0.742162	0.228689	0.241373	0.216005	0.242036	0.243914	0.774275	0.800167	937	0	650	64	58.25	SIEMENS NM	156.254	0.328807	0.22989	0.335663	-1.09165	8999.77	391	3389.7	207		2015-02-25	59.9218	99.9915	0.90516	0.997451	0.765574	0.997451	0.185633	0.236124	0.560301	0.221667	0.221588	0.221747
0110622480			051Y	2013-12-10	63.3362	99.9775	0.915171	0.998296	0.749942	0.998296	0.227744	0.240808	0.700463	0.22788	0.212815	0.242945	0.244684	0.242557	0.81215	0.781064	845	37	860	71	51.6563	SIEMENS NM	165.507	0.2259	0.251379	0.24108	-1.42263	7760.15	391	2845.17	208		2014-09-01	56.2349	99.9554	0.895027	0.99988	0.80883	0.99988	0.128994	0.240808	0.613244	0.217773	0.246357	0.189189
0707642108			048Y	2013-05-17	92.7221	100.831	0.972781	0.998102	0.926775	0.998102	0.238481	0.276099	0.637385	0.253249	0.289852	0.216647	0.236063	0.242747	0.710378	0.783607	1016	9	479	59	67.7812	SIEMENS NM	166.426	0.568023	0.271271	0.223271	-1.49937	3490	390	254	213		2014-03-18	71.1719	100.418	0.961795	0.995946	0.906037	0.995946	0.220259	0.276099	0.651788	0.268513	0.236799	0.300227
0301582203			057Y	2015-01-06	64.9335	100.017	0.911855	0.995683	0.839801	0.995683	0.173593	0.239441	0.588942	0.255269	0.220192	0.290346	0.24556	0.240236	0.827055	0.752651	555	14	1415	108	34.5	SIEMENS NM	165.195	0.592814	0.259619	0.276204	-1.28662	9960.24	388	3492.71	212		2015-09-21	60.3667	100.026	0.883835	0.998414	0.798382	0.998414	0.147573	0.239441	0.56751	0.266835	0.289073	0.244596
2501972112			017Y	2015-01-08	67.6638	100.085	0.827271	0.999882	0.70328	0.999882	0.207241	0.241821	0.493202	0.229459	0.248206	0.210713	0.241407	0.244209	0.76642	0.804643	1276	71	341	47	80	SIEMENS NM	171.791	0.292921	0.240173	0.237003	-1.43968	8605.63	391	2782.73	208		2015-04-30	60.9119	100.12	0.936455	0.999981	0.855162	0.999981	0.178776	0.241821	0.53866	0.223132	0.21752	0.228745
0606632026			051Y	2015-01-08	58.6093	99.9883	0.870926	0.999324	0.821749	0.999324	0.140956	0.235511	0.463259	0.197868	0.20774	0.187995	0.240713	0.24225	0.758137	0.777032	821	8	1159	73	50.9375	SIEMENS NM	164.847	0.154918	0.242067	0.254959	-1.36665	15197.1	392	6290.18	207		2015-07-14	57.9607	99.9502	0.844291	0.997875	0.788166	0.997875	0.208254	0.235511	0.479634	0.238233	0.249212	0.227254
0804532044			061Y	2014-12-08	57.5767	99.7535	0.913307	0.987398	0.847225	0.987398	0.090646	0.265193	0.6004	0.439495	0.529117	0.349872	0.223197	0.246726	0.615515	0.849815	983	10	714	61	61.75	SIEMENS NM	159.406	0.635372	0.256293	0.347992	-1.05558	10422.4	394	4421.51	230		2015-11-09	65.1171	99.9455	0.960012	0.999435	0.861294	0.999435	0.085127	0.265193	0.7012	0.245503	0.215673	0.275332
1210692120			043Y	2013-07-05	61.3674	100.12	0.938038	1	0.835552	1	0.207889	0.267722	0.669017	0.244773	0.223408	0.266138	0.244233	0.240933	0.805018	0.760723	1034	155	494	58	63.7813	SIEMENS NM	165.535	0.608566	0.265235	0.306043	-1.18403	6555.6	386	2532.6	211		2014-02-24	58.6599	100.144	0.930005	0.997451	0.8027	0.997451	0.137569	0.267722	0.890779	0.224483	0.215185	0.233781
0505602326			053Y	2013-08-19	57.5073	99.9634	0.944891	0.999457	0.867971	0.999457	0.0921003	0.267968	0.669086	0.266275	0.195694	0.336856	0.249096	0.24063	0.918348	0.757172	869	24	695	69	54.0625	SIEMENS NM	152.189	0.543182	0.287426	0.302437	-1.19588	8662.2	401	3680.8	209		2014-05-08	55.9042	99.9496	0.890977	0.998261	0.794527	0.998261	0.101995	0.267968	0.647199	0.254537	0.225989	0.283086
1008692182			045Y	2015-03-23	58.703	99.9472	0.968369	0.997655	0.836768	0.997655	0.265117	0.251622	0.718899	0.232306	0.2358	0.228811	0.239322	0.239944	0.742582	0.749373	800	393	1623	75	47.0312	SIEMENS NM	175.205	0.271771	0.252425	0.211567	-1.55322	5986.24	386	2472.14	213		2016-01-14	55.9413	99.9638	0.954407	0.999923	0.908295	0.999923	0.266385	0.251622	0.734541	0.236986	0.291493	0.18248
3110652005			053Y	2019-04-01	58.7958	100.351	0.87908	0.99328	0.802463	0.99328	0.184882	0.218836	0.564319	0.230168	0.219089	0.241247	0.246228	0.244906	0.839613	0.81579	937	3	621	64	58.5	SIEMENS NM	169.28	0.589526	0.254928	0.298942	-1.20751	13708.7	394	5648.54	222		2019-10-28	58.6905	100.116	0.786363	0.99853	0.653073	0.99853	0.129238	0.218836	0.614055	0.289608	0.261849	0.317367
0404482201			065Y	2014-03-17	69.7952	100.12	0.943263	0.997631	0.851633	0.997631	0.155123	0.25971	0.68734	0.234058	0.237038	0.231078	0.243622	0.24404	0.795859	0.802076	697	2	574	86	41.5312	SIEMENS NM	160.08	0.438495	0.253312	0.280261	-1.27204	7169.77	384	2165.61	211		2014-10-29	70.2354	100.134	0.911705	0.995366	0.799828	0.995366	0.220011	0.25971	0.657335	0.253693	0.278514	0.228872
1903552087			059Y	2014-12-01	56.7306	100.014	0.961812	0.999614	0.914948	0.999614	0.171203	0.237907	0.63685	0.235178	0.231977	0.238379	0.243174	0.242694	0.78947	0.78289	681	5	914	88	42.4688	SIEMENS NM	168.927	0.573439	0.235789	0.313637	-1.15952	9616.76	389	4161.12	205		2014-05-13	61.2781	100.039	0.96661	0.999764	0.909772	0.999764	0.17096	0.237907	0.566564	0.226021	0.227009	0.225032
0608770604			037Y	2014-09-09	64.4813	100.179	0.921917	0.99961	0.811238	0.99961	0.192583	0.273684	0.533811	0.243047	0.226849	0.259245	0.239227	0.236076	0.741566	0.710494	909	4	507	66	56.7188	SIEMENS NM	164.122	0.567023	0.278051	0.29563	-1.21865	8130	387	2887.67	211		2015-04-07	73.7557	100.184	0.944254	0.999331	0.825847	0.999331	0.165624	0.273684	0.577779	0.222687	0.276304	0.16907
3011552207			059Y	2015-11-02	80.7816	100.436	0.952061	0.998798	0.863627	0.998798	0.153006	0.236478	0.608231	0.229236	0.247654	0.210819	0.241442	0.244192	0.766848	0.804393	1034	9	461	58	65.9062	SIEMENS NM	165.638	0.56475	0.237332	0.281317	-1.26827	4498.21	392	864.483	209		2015-11-02	80.7816	100.436	0.952061	0.998798	0.863627	0.998798	0.153006	0.236478	0.651821	0.229236	0.247654	0.210819
0108672468			047Y	2015-01-14	70.8757	99.9303	0.952567	0.584877	0.868558	0.584877	0.113312	0.258075	0.608231	0.275462	0.19781	0.353114	0.246808	0.233326	0.851575	0.68671	800	33	601	75	50.2812	SIEMENS NM	162.72	0.482695	0.257841	0.30569	-1.18518	4268.86	164	1243.28	49		2015-08-18	53.1842	99.9795	0.93569	0.996792	0.89766	0.996792	0.182205	0.258075	0.587578	0.227544	0.157245	0.297843
1305622162			052Y	2014-12-19	70.236	99.958	0.863388	0.996852	0.747959	0.996852	0.165452	0.231002	0.57819	0.443042	0.532177	0.353908	0.21353	0.242171	0.561892	0.776006	779	7	936	77	47.375	SIEMENS NM	165.56	0.529743	0.245495	0.287327	-1.24714	10176.4	424	3028.9	229		2015-08-18	60.3996	99.9721	0.883694	0.994511	0.785818	0.994511	0.175143	0.231002	0.60792	0.285635	0.210268	0.361002
0712522107			062Y	2015-04-23	60.9495	99.9954	0.942688	0.998447	0.863129	0.998447	0.224553	0.231908	0.525589	0.239005	0.228979	0.24903	0.24375	0.242247	0.797734	0.776987	750	1	606	80	47.2812	SIEMENS NM	167.247	0.255319	0.232728	0.21094	-1.55618	8282.27	388	3234.27	208		2015-11-10	57.72	100.026	0.956355	0.999924	0.897634	0.999924	0.220935	0.231908	0.464889	0.230511	0.225581	0.235442
1207522023			065Y	2018-02-22	61.2732	100.065	0.841348	0.998463	0.793108	0.998463	0.162424	0.230849	0.539218	0.23156	0.204376	0.258745	0.245707	0.241938	0.82972	0.773021	789	16	842	76	48.9375	SIEMENS NM	165.752	0.158641	0.228303	0.225624	-1.48888	15039.9	390	5824.47	208		2018-10-09	56.0154	100.03	0.870266	0.996956	0.802665	0.996956	0.161997	0.230849	0.51113	0.25846	0.250965	0.265955
0309702305			047Y	2017-11-13	65.5901	100.021	0.919952	0.999423	0.794488	0.999423	0.181782	0.252316	0.818258	0.238812	0.265519	0.212104	0.243883	0.247091	0.799713	0.857872	705	2	1783	85	43.875	SIEMENS NM	161.638	0.406357	0.256016	0.286772	-1.24907	6385.57	389	2197.27	206		2018-07-16	58.901	100.007	0.933414	0.998121	0.844409	0.998121	0.138652	0.252316	0.814985	0.242472	0.223495	0.261448
0201622246			055Y	2017-09-18	65.6657	99.9637	0.868067	0.995946	0.697888	0.995946	0.165991	0.237401	0.76548	0.239443	0.247223	0.231662	0.239664	0.241017	0.746285	0.761713	1071	24	779	56	66.875	SIEMENS NM	173.421	0.481662	0.242019	0.274477	-1.29289	7865.9	387	2700.7	211		2018-05-31	62.3076	99.9645	0.866721	0.998102	0.695287	0.998102	0.21004	0.237401	0.687614	0.260878	0.232994	0.288763
1702585506			060Y	2018-02-28	60.4039	100.112	0.929376	0.99624	0.83948	0.99624	0.181806	0.23116	0.705897	0.281165	0.316013	0.246317	0.236218	0.2428	0.711797	0.784327	740	2	939	81	46.1875	SIEMENS NM	171.714	0.591327	0.227475	0.285875	-1.2522	10627.2	388	4207.97	214		2018-12-17	59.1971	100.073	0.857504	0.99876	0.80043	0.99876	0.174214	0.23116	0.464725	0.238758	0.240461	0.237055
1911712063			046Y	2018-06-05	60.6787	100.155	0.91851	0.997581	0.810705	0.997581	0.212524	0.235078	0.583378	0.269894	0.246656	0.293132	0.244808	0.241203	0.814168	0.76394	1000	2	531	60	61.6875	SIEMENS NM	169.265	0.613578	0.275476	0.276717	-1.28476	9095.33	380	3576.4	207		2019-01-08	62.3615	100.149	0.885701	0.999549	0.794349	0.999549	0.169134	0.235078	0.562772	0.284603	0.230479	0.338728
0506742121			042Y	2017-02-17	61.9341	99.9643	0.92395	0.999882	0.823366	0.999882	0.218729	0.226939	0.590609	0.240298	0.245028	0.235569	0.240584	0.241383	0.756639	0.766119	789	0	859	76	49.1875	SIEMENS NM	171.459	0.316171	0.227042	0.249416	-1.38863	6489.83	391	2470.41	210		2017-08-17	55.6727	99.9577	0.962944	0.999958	0.740629	0.999958	0.201473	0.226939	0.648832	0.241546	0.195765	0.287326
1705935648			024Y	2018-03-05	64.374	100.085	0.973741	0.999958	0.914337	0.999958	0.153429	0.254395	0.727787	0.269772	0.28166	0.257885	0.23859	0.240804	0.734878	0.7592	882	250	649	68	55.9375	SIEMENS NM	161.821	0.588302	0.251188	0.289689	-1.23895	5420.57	391	1931.13	212		2018-04-30	58.9218	100.124	0.963506	0.999981	0.88218	0.999981	0.167993	0.254395	0.838513	0.218675	0.226488	0.210861
0806692103			048Y	2017-12-05	56.4898	100.081	0.96025	0.999031	0.893984	0.999031	0.203853	0.226433	0.605323	0.240023	0.255185	0.22486	0.244753	0.246562	0.813261	0.846374	869	29	615	69	54.1875	SIEMENS NM	168.323	0.416544	0.228214	0.258916	-1.35125	7920.75	382	3446.34	209		2018-10-29	52.4247	100.11	0.950109	0.981113	0.905781	0.981113	0.209453	0.226433	0.510524	0.251548	0.250409	0.252687
2804662160			051Y	2017-09-13	60.9827	99.9416	0.928052	0.998608	0.849665	0.998608	0.203164	0.247172	0.734527	0.226279	0.20297	0.249589	0.241957	0.237915	0.773266	0.728036	759	10	1713	79	46.9375	SIEMENS NM	166.517	0.601797	0.248994	0.307353	-1.17976	7392.23	387	2884.25	208		2018-03-06	53.083	99.9406	0.9684	0.999031	0.885792	0.999031	0.24186	0.247172	0.650439	0.226767	0.200601	0.252933
1311612203			051Y	2012-11-22	61.5368	100.159	0.952098	0.999923	0.905967	0.999923	0.200313	0.245555	0.792599	0.241998	0.252004	0.231991	0.243508	0.244887	0.794216	0.815465	545	13	814	110	33.375	SIEMENS NM	169.153	0.543581	0.243836	0.292563	-1.22908	10309.5	388	3965.35	206		2013-06-17	65.7607	100.118	0.923573	0.996201	0.836745	0.996201	0.202618	0.245555	0.854256	0.244986	0.230048	0.259924
2503792189			038Y	2017-05-04	68.3903	100.103	0.909302	0.993845	0.805832	0.993845	0.117875	0.228238	0.592388	0.237733	0.219137	0.256328	0.246526	0.244254	0.845614	0.80534	1153	17	450	52	71.1875	SIEMENS NM	156.744	0.493262	0.227612	0.321624	-1.13437	6525	390	2062.53	217		2018-01-09	56.3975	100.126	0.950981	0.994794	0.886854	0.994794	0.121018	0.228238	0.598161	0.245479	0.224873	0.266086
2603690949			047Y	2016-10-19	61.1484	99.8849	0.839966	0.99403	0.71681	0.99403	0.151613	0.244144	0.714838	0.280297	0.316673	0.243921	0.23699	0.243602	0.719027	0.795579	967	4	646	62	59.8438	SIEMENS NM	160.041	0.405274	0.245238	0.26879	-1.31382	11181	385	4344	213		2017-07-11	60.1132	99.865	0.824093	0.99768	0.706898	0.99768	0.171713	0.244144	0.758008	0.229622	0.244093	0.215152
2011642248			051Y	2016-04-01	57.0635	100.17	0.945217	0.998734	0.874367	0.998734	0.214069	0.228299	0.573748	0.230533	0.21195	0.249117	0.24449	0.241768	0.809043	0.770886	909	27	626	66	56.6562	SIEMENS NM	170.003	0.564359	0.224017	0.276231	-1.28652	9828.74	382	4220.12	208		2016-11-29	50.6469	100.166	0.965984	0.99908	0.92443	0.99908	0.139981	0.228299	0.632268	0.216989	0.25901	0.174968
2801672165			050Y	2018-01-17	59.3598	99.9642	0.880075	0.999177	0.816556	0.999177	0.23192	0.259151	0.568384	0.234059	0.248181	0.219936	0.239718	0.242088	0.746878	0.774938	923	52	1256	65	57.1875	SIEMENS NM	174.494	0.228811	0.26822	0.227403	-1.48103	11828.5	385	4807.14	209		2018-07-23	59.0564	99.9757	0.889133	0.999924	0.757565	0.999924	0.128312	0.259151	0.560438	0.25579	0.217525	0.294054
1305382307			074Y	2012-10-17	61.8933	99.8969	0.961914	0.998734	0.913585	0.998734	0.289193	0.252569	0.794827	0.264193	0.218166	0.310221	0.246187	0.239085	0.838815	0.740051	895	4	207	67	55.9375	SIEMENS NM	169.202	0.415593	0.24201	0.152051	-1.88354	4883.66	382	1861	210		2013-04-02	54.3972	99.9222	0.930912	0.999696	0.848427	0.999696	0.189104	0.252569	0.651218	0.226573	0.259513	0.193633
0908742002			043Y	2018-07-24	55.5039	99.9813	0.952359	0.996201	0.856094	0.996201	0.218402	0.230914	0.461124	0.237814	0.224183	0.251444	0.235536	0.232597	0.705613	0.680818	769	2	1394	78	47.875	SIEMENS NM	180.866	0.44467	0.237385	0.267032	-1.32039	5632.4	386	2506.2	208		2018-09-12	51.8594	99.8739	0.943734	0.99285	0.866251	0.99285	0.221827	0.230914	0.595743	0.27275	0.263434	0.282066
0908402066			077Y	2018-07-25	60.4616	100.012	0.919974	0.997121	0.859396	0.997121	0.233679	0.234522	0.504491	0.243029	0.24339	0.242668	0.242987	0.243041	0.786878	0.787629	1000	350	632	60	48.5	SIEMENS NM	175.036	0.496591	0.235327	0.280954	-1.26956	8585.81	380	3394.7	209		2019-03-11	62.0303	100.01	0.840025	0.999696	0.771573	0.999696	0.226762	0.234522	0.539133	0.270104	0.26771	0.272498
3006742001			042Y	2017-04-05	58.9741	100.147	0.895041	0.999995	0.840756	0.999995	0.204377	0.241494	0.497716	0.242907	0.248774	0.237041	0.244281	0.24506	0.805769	0.818354	833	201	751	72	51.1875	SIEMENS NM	166.412	0.300184	0.236423	0.234973	-1.44829	12831.2	387	5264.1	209		2017-12-18	57.3637	100.151	0.895906	0.999186	0.825304	0.999186	0.187749	0.241494	0.530776	0.260864	0.248215	0.273512
0201700603			047Y	2017-12-20	57.7919	99.8692	0.928757	0.996558	0.794703	0.996558	0.157527	0.241992	0.78307	0.249504	0.244269	0.254739	0.245921	0.245282	0.8337	0.82215	882	8	846	68	54.3125	SIEMENS NM	163.904	0.257384	0.237411	0.272139	-1.30144	8238.7	391	3477.4	212		2018-07-30	56.2843	99.8545	0.929427	0.999317	0.854746	0.999317	0.146643	0.241992	0.787487	0.240169	0.219048	0.261291
2107532222			064Y	2018-05-15	62.665	100.235	0.953951	0.999399	0.911923	0.999399	0.190554	0.222607	0.568088	0.237055	0.225072	0.249037	0.24308	0.241191	0.788166	0.763791	810	8	725	74	50.375	SIEMENS NM	163.1	0.605515	0.21565	0.299747	-1.20482	10299.2	381	3845.23	209		2019-02-01	63.8188	100.201	0.935296	0.999957	0.892435	0.999957	0.215869	0.222607	0.507796	0.244663	0.22498	0.264346
0211592048			058Y	2018-07-31	60.6675	99.9645	0.962706	0.996201	0.899507	0.996201	0.166796	0.242397	0.732095	0.274845	0.301674	0.248015	0.239861	0.244294	0.748452	0.805963	705	34	1028	85	43.5625	SIEMENS NM	165.629	0.51608	0.241292	0.277315	-1.2826	6922.61	386	2722.83	209		2019-07-09	60.6065	99.9869	0.936935	0.999295	0.851073	0.999295	0.221263	0.242397	0.770093	0.22806	0.216757	0.239363
2307572228			060Y	2018-01-11	70.6168	100.041	0.936354	0.995903	0.772164	0.995903	0.230218	0.26003	0.659009	0.238148	0.245758	0.230539	0.244532	0.245503	0.80971	0.826048	967	0	604	62	59.5625	SIEMENS NM	167.623	0.249384	0.267677	0.228781	-1.47499	6131.17	385	1801.53	212		2018-08-02	62.6975	100.009	0.904845	0.999693	0.75313	0.999693	0.259184	0.26003	0.551383	0.246474	0.212219	0.28073
2607402042			078Y	2018-08-06	64.3398	100.133	0.945713	0.996522	0.861507	0.996522	0.184544	0.232177	0.730954	0.224328	0.290154	0.158502	0.235326	0.245951	0.703744	0.834263	909	13	870	66	56.125	SIEMENS NM	159.749	0.565104	0.227865	0.284659	-1.25646	8736.93	389	3115.6	212		2019-05-09	64.016	100.107	0.849266	0.999089	0.784772	0.999089	0.210494	0.232177	0.601056	0.240632	0.177866	0.303397
0804512213			062Y	2014-01-21	56.9671	100.031	0.920412	0.999923	0.863808	0.999923	0.183867	0.22656	0.48019	0.217443	0.217978	0.216909	0.242194	0.242276	0.776301	0.777362	750	5	974	80	46.75	SIEMENS NM	167.986	0.182727	0.264959	0.227029	-1.48268	13916.2	388	5988.53	212		2017-10-26	56.2897	100.017	0.919158	0.99988	0.873832	0.99988	0.202981	0.22656	0.501075	0.219788	0.215751	0.223826
2706482087			064Y	2013-01-23	66.1105	100.046	0.896872	0.997019	0.803702	0.997019	0.276711	0.255672	0.500635	0.253055	0.241029	0.265081	0.243911	0.242076	0.800133	0.774777	937	36	491	64	53.6875	SIEMENS NM	158.804	0.267346	0.26931	0.180432	-1.7124	7972.57	389	2701.87	212		2014-01-22	54.6499	100.069	0.939984	0.999922	0.870189	0.999922	0.176152	0.255672	0.549805	0.231483	0.202842	0.260124
1107675936			070Y	2013-06-12	61.7563	99.6543	0.850281	0.999405	0.768518	0.999405	0.232121	0.199865	0.477094	0.229718	0.233125	0.226311	0.239789	0.240381	0.747655	0.754298	895	22	600	67	53.5625	SIEMENS NM	171.53	0.231639	0.19795	0.223885	-1.49662	14888.3	383	5693.85	206		2014-09-15	30.7601	99.5766	0.969214	0.557082	0.954469	0.557082	0.247337	0.199865	0.465952	0.235077	0.211625	0.258529
2012422063			070Y	2013-06-12	62.5716	100.038	0.832784	0.99721	0.734493	0.99721	0.21114	0.247176	0.471711	0.231865	0.232785	0.230945	0.240774	0.240929	0.75885	0.760669	895	22	600	67	53.5625	SIEMENS NM	170.811	0.248924	0.292063	0.23415	-1.45179	15112.6	386	5656.4	209		2014-06-16	57.868	100.075	0.862628	0.999696	0.828851	0.999696	0.255105	0.247176	0.455224	0.222456	0.230263	0.214649
2805512049			062Y	2013-11-12	56.5826	100.171	0.859094	0.994092	0.774004	0.994092	0.190166	0.262792	0.466593	0.244769	0.250176	0.239362	0.242451	0.243276	0.779656	0.7909	1034	2	520	58	62.6562	SIEMENS NM	163.903	0.556816	0.265829	0.290179	-1.23726	15369.4	387	6673	220		2014-01-20	54.5998	100.195	0.890619	0.999061	0.84022	0.999061	0.127972	0.262792	0.463464	0.250324	0.29095	0.209697
0711312060			080Y	2012-08-09	60.2268	99.9241	0.87628	0.999981	0.796994	0.999981	0.21357	0.239251	0.516363	0.245215	0.253714	0.236715	0.2398	0.241275	0.747778	0.764811	967	0	681	62	60.125	SIEMENS NM	162.949	0.211641	0.24227	0.196225	-1.62849	14022.7	388	5577.29	207		2013-02-04	58.0538	99.906	0.888673	0.998905	0.84821	0.998905	0.227222	0.239251	0.593277	0.222998	0.236443	0.209553
0609772260			035Y	2013-03-08	61.4238	100.111	0.919052	0.998593	0.854525	0.998593	0.206598	0.235379	0.413731	0.223237	0.257028	0.189446	0.241988	0.246449	0.773659	0.844032	833	50	479	72	48.8125	SIEMENS NM	160.641	0.222878	0.235926	0.206527	-1.57732	9683.33	385	3735.47	206		2013-10-28	60.5742	100.103	0.89176	0.999981	0.826185	0.999981	0.113689	0.235379	0.421308	0.235981	0.197985	0.273977
0302502106			062Y	2013-01-10	58.7871	99.9273	0.882711	0.998431	0.763897	0.998431	0.17074	0.257521	0.606053	0.270174	0.236489	0.303859	0.248697	0.245336	0.902751	0.823095	952	35	1625	63	58.7188	SIEMENS NM	163.501	0.223605	0.263531	0.232383	-1.45937	10312	386	4249.87	211		2013-09-27	55.9697	100.022	0.886375	0.999526	0.784172	0.999526	0.163356	0.257521	0.638147	0.202889	0.220329	0.185448
1003635458			050Y	2013-05-01	56.004	100.201	0.942237	0.997451	0.878044	0.997451	0.250399	0.233408	0.575499	0.252123	0.249175	0.255071	0.241968	0.241482	0.773401	0.767328	652	7	1003	92	41.75	SIEMENS NM	172.738	0.409302	0.231003	0.260449	-1.34535	9435	387	4151.02	206		2014-01-30	57.2645	100.221	0.937055	0.999051	0.871221	0.999051	0.271298	0.233408	0.460931	0.23365	0.220653	0.246648
2810522049			060Y	2012-12-14	63.3162	100.073	0.938056	0.996758	0.840376	0.996758	0.205321	0.239045	0.580428	0.230957	0.239517	0.222397	0.241087	0.242455	0.762547	0.779713	821	16	1172	73	51.8438	SIEMENS NM	173.971	0.538201	0.243711	0.250208	-1.38546	8892.21	388	3262	212		2014-01-30	60.5127	100.097	0.870967	0.998916	0.759878	0.998916	0.226233	0.239045	0.516932	0.225015	0.210642	0.239388
1303502364			063Y	2014-02-05	64.3975	99.9493	0.903132	0.995219	0.731894	0.995219	0.217188	0.242108	0.67726	0.222463	0.191453	0.253473	0.24268	0.237368	0.782701	0.722663	1132	180	1043	53	70.375	SIEMENS NM	165.478	0.403124	0.235621	0.218256	-1.52209	7113.58	381	2532.61	211		2014-07-09	58.8221	99.9968	0.936577	0.998102	0.855303	0.998102	0.182556	0.242108	0.640027	0.227648	0.234383	0.220914
1109322100			081Y	2014-02-06	61.0175	99.9818	0.928113	0.996725	0.843468	0.996725	0.218675	0.262484	0.436199	0.232477	0.213732	0.251223	0.239918	0.236388	0.749085	0.713366	1153	2	461	52	71.0312	SIEMENS NM	158.635	0.221793	0.260879	0.163321	-1.81204	13818	386	5386.59	207		2014-06-02	61.8668	100.016	0.897006	0.999827	0.825813	0.999827	0.173284	0.262484	0.548313	0.220741	0.164341	0.277141
0210562498			057Y	2014-02-07	58.4839	100.077	0.8767	0.999922	0.833284	0.999922	0.224905	0.22766	0.589287	0.199792	0.190762	0.208822	0.241008	0.23951	0.761609	0.744612	869	6	639	69	53.9062	SIEMENS NM	164.795	0.468839	0.223386	0.264233	-1.33092	11058.4	384	4591	204		2014-08-11	54.7376	100.067	0.926991	0.995461	0.86504	0.995461	0.221905	0.22766	0.522809	0.236799	0.237281	0.236317
0412656272			047Y	2013-07-12	65.6559	99.8849	0.853374	0.998938	0.779442	0.998938	0.198161	0.247296	0.66393	0.218833	0.224299	0.213366	0.240503	0.241402	0.755705	0.766355	659	6	1046	91	41.3125	SIEMENS NM	166.432	0.190462	0.244512	0.227421	-1.48095	10407.2	391	3574.28	205		2014-02-20	66.8408	99.8924	0.801716	0.993716	0.678405	0.993716	0.16711	0.247296	0.628696	0.259341	0.217319	0.301363
2801502162			062Y	2012-11-15	66.2778	100.043	0.907256	0.998278	0.828648	0.998278	0.223562	0.236835	0.643906	0.23321	0.227777	0.238642	0.240102	0.239134	0.751142	0.740574	857	188	553	70	55.6563	SIEMENS NM	168.684	0.240236	0.233334	0.173446	-1.75189	8844.94	389	2982.71	211		2013-11-25	57.7175	100.025	0.874541	0.999618	0.811791	0.999618	0.165198	0.236835	0.534151	0.260284	0.268678	0.251891
2704682224			044Y	2012-08-13	65.8812	100.093	0.844106	0.995414	0.681528	0.995414	0.205721	0.257165	0.64258	0.236771	0.213799	0.259742	0.242627	0.238727	0.781999	0.736301	882	25	1278	68	57	SIEMENS NM	168.741	0.222137	0.253421	0.22766	-1.4799	9337.89	389	3185.97	211		2013-04-08	63.1317	100.105	0.954647	0.99721	0.785387	0.99721	0.18861	0.257165	0.629154	0.229141	0.232426	0.225856
0206792107			033Y	2012-10-22	63.8866	100.233	0.945505	0.999429	0.791512	0.999429	0.200611	0.24043	0.679096	0.229719	0.200592	0.258846	0.245142	0.240874	0.819756	0.76002	1000	28	557	60	57.7813	SIEMENS NM	172.782	0.536856	0.234628	0.285813	-1.25242	6297.1	391	2274.1	211		2013-10-04	57.4371	100.097	0.939328	0.996317	0.861799	0.996317	0.0827154	0.24043	0.580181	0.236462	0.246049	0.226876
1312602406			052Y	2013-05-22	61.9527	100.178	0.909331	0.998773	0.81419	0.998773	0.248685	0.258022	0.612072	0.234524	0.244498	0.22455	0.238595	0.240384	0.734932	0.754337	714	0	845	84	44.3438	SIEMENS NM	170.091	0.354794	0.260735	0.247703	-1.39552	8473	388	3223.75	209		2014-03-03	59.916	99.9845	0.893612	0.999923	0.782137	0.999923	0.113682	0.258022	0.575398	0.243256	0.264617	0.221895
3101422000			070Y	2012-09-17	62.528	99.9936	0.845107	0.999878	0.784754	0.999878	0.150151	0.250023	0.624556	0.249816	0.251955	0.247677	0.238382	0.238789	0.73275	0.736941	1052	10	833	57	65.0938	SIEMENS NM	160.356	0.190673	0.248367	0.211196	-1.55497	12698	385	4758.2	208		2013-07-02	61.7616	99.9709	0.847868	0.997875	0.72833	0.997875	0.190897	0.250023	0.696568	0.253284	0.225179	0.281389
2202632026			049Y	2013-02-06	60.1872	99.8807	0.890926	0.999831	0.830226	0.999831	0.211229	0.226382	0.766118	0.276187	0.192739	0.359635	0.249324	0.23879	0.929024	0.736954	779	24	866	77	48.5625	SIEMENS NM	164.898	0.218803	0.222552	0.255658	-1.36392	11281.6	392	4491.51	209		2013-12-23	58.873	99.934	0.872163	0.998414	0.759071	0.998414	0.203674	0.226382	0.670058	0.231433	0.188992	0.273874
2709602148			052Y	2013-07-23	63.3009	100.125	0.883514	0.996412	0.770439	0.996412	0.25693	0.259536	0.500486	0.231219	0.213665	0.248772	0.240459	0.237245	0.755194	0.721477	857	4	564	70	54.1562	SIEMENS NM	158.314	0.254368	0.260708	0.199104	-1.61393	10014.1	383	3675.07	209		2014-04-28	60.5609	100.127	0.89958	0.999957	0.833805	0.999957	0.276269	0.259536	0.518877	0.229217	0.239346	0.219089
0707642108			048Y	2013-05-17	92.7221	100.831	0.972781	0.998102	0.926775	0.998102	0.238481	0.276099	0.637385	0.253249	0.289852	0.216647	0.236063	0.242747	0.710378	0.783607	1016	9	479	59	67.7812	SIEMENS NM	166.426	0.568023	0.271271	0.223271	-1.49937	3490	390	254	213		2014-03-18	71.1719	100.418	0.961795	0.995946	0.906037	0.995946	0.220259	0.276099	0.651788	0.268513	0.236799	0.300227
[truncated: 23 more columns]

## Sheet: Wiener
patient ID				Parameters
				pre-therapy																																	post-therapy
	BMI	chemocare record	age	date	LVEF%	LVEFPhase	Synchrony	SynchronyMaxMin	Entropy	EntropyMaxMin	App_Entropy	App_EntropyMaxMin	LHR	Average FS	LA FS	SA FS	Circulatory diastole	Circulatory Systole	Elongation Diastole	Elongation systole	(mean RR duration)	rejected beats	Accepted beats	Heart rate	frame time	Manufacturer	Phase	BoundApEn	BoundApEnMaxMin	ε	Log(ε)	Max Count	Max Pixel Num	Min Count	Min Pixel Num	kinetics	date	LVEF%	LVEF_Phase%	Synchrony	SynchronyMaxMin	Entropy	EntropyMaxMin	App_Entropy	App_EntropyMaxMin	LHR	Average FS	LA FS	SA FS
0312542186			060Y	2015-04-13	85.1867	99.9491	0.94052	0.996199	0.779151	0.996199	0.15639	0.230732	0.533944	0.238618	0.217901	0.259335	0.245205	0.242275	0.820836	0.77735	645	0	1319	93	39.9375	SIEMENS NM	169.147	0.181326	0.232642	0.265598	-1.32577	2741.48	317	406.103	157		2015-08-17	53.3279	99.8882	0.939846	0.981248	0.872164	0.981248	0.16849	0.230732	0.477929	0.232941	0.258581	0.207301
3008822223			032Y	2014-10-21	62.3161	99.9909	0.88835	0.98984	0.795408	0.98984	0.151653	0.22921	0.708638	0.253367	0.210357	0.296377	0.244025	0.236509	0.801842	0.714493	1153	107	492	52	73.9375	SIEMENS NM	171.044	0.570268	0.230011	0.31394	-1.15855	8502.45	329	3204.06	156		2015-01-15	65.0205	99.9753	0.9288	0.996428	0.826722	0.996428	0.181098	0.22921	0.783363	0.232091	0.239076	0.225106
0107652005			049Y	2014-08-04	69.4297	100.011	0.944849	0.998218	0.891254	0.998218	0.184031	0.25461	0.84444	0.232383	0.233469	0.231298	0.242444	0.242611	0.77957	0.781778	722	27	805	83	42.8125	SIEMENS NM	167.065	0.589328	0.25696	0.291641	-1.23223	5097.53	322	1558.33	160		2015-01-19	57.3375	99.9931	0.936589	0.997853	0.888636	0.997853	0.0992493	0.25461	0.728147	0.237195	0.251317	0.223073
1506830862			031Y	2014-12-15	71.7672	99.9875	0.938625	0.999743	0.835228	0.999743	0.141139	0.238269	0.718802	0.226893	0.250537	0.203249	0.239948	0.24368	0.749425	0.79671	759	36	865	79	46.9375	SIEMENS NM	161.814	0.584612	0.238786	0.295817	-1.21801	5647.8	318	1594.53	157		2014-12-15	71.7672	99.9875	0.938625	0.999743	0.835228	0.999743	0.141139	0.238269	0.74294	0.226893	0.250537	0.203249
1509631046			049Y	2012-10-23	63.8857	99.9325	0.902496	0.999972	0.82338	0.999972	0.120872	0.235737	0.80883	0.242867	0.249623	0.23611	0.241876	0.242934	0.772243	0.78615	1111	74	985	54	69.4375	SIEMENS NM	158.341	0.536809	0.258522	0.317941	-1.14589	9212.31	322	3326.97	164		2015-07-24	62.1587	99.948	0.827683	0.997976	0.7248	0.997976	0.125629	0.235737	0.607962	0.239597	0.270006	0.209188
0801792207			036Y	2015-10-02	63.0335	99.9818	0.947984	0.998636	0.845513	0.998636	0.108697	0.243308	0.651859	0.246775	0.221771	0.271779	0.243251	0.239056	0.790552	0.739752	1052	111	534	57	67.375	SIEMENS NM	161.128	0.504058	0.242609	0.300468	-1.20241	4773.87	322	1764.73	164		2015-11-09	63.9297	99.9206	0.947653	0.995077	0.818229	0.995077	0.109865	0.243308	0.617297	0.224284	0.245157	0.20341
2111652148			047Y	2013-01-22	67.092	99.8986	0.900754	0.999555	0.819353	0.999555	0.147166	0.272371	0.665319	0.255542	0.234552	0.276531	0.240987	0.237051	0.761361	0.719607	833	2	717	72	51.8125	SIEMENS NM	158.433	0.269377	0.274754	0.252524	-1.37625	8710	322	2866.29	164		2013-10-21	59.351	99.9382	0.89325	0.996038	0.827097	0.996038	0.180361	0.272371	0.684396	0.243173	0.302823	0.183524
1302522183			061Y	2013-05-09	69.1201	99.9217	0.930938	0.999937	0.715735	0.999937	0.131752	0.251534	0.884433	0.229416	0.218266	0.240567	0.240759	0.238797	0.758673	0.73703	895	33	1056	67	57.2812	SIEMENS NM	159.865	0.214996	0.261717	0.242431	-1.41704	5677.59	321	1753.24	159		2014-08-18	74.3504	99.9321	0.915645	0.996134	0.678866	0.996134	0.16057	0.251534	1.07181	0.240677	0.217847	0.263507
1909472174			066Y	2014-08-20	73.1604	99.9636	0.91682	0.999321	0.804904	0.999321	0.0829634	0.236566	0.543623	0.250864	0.238853	0.262875	0.243967	0.242147	0.800972	0.775693	740	0	552	81	45.125	SIEMENS NM	164.46	0.526387	0.233093	0.300166	-1.20342	7215.28	326	1936.55	159		2014-11-24	78.0504	100.045	0.910608	0.997316	0.793148	0.997316	0.190222	0.236566	0.615972	0.220077	0.254408	0.185745
2401402012			075Y	2015-05-26	60.2065	99.8846	0.927853	0.999657	0.851435	0.999657	0.156155	0.234362	0.534013	0.23329	0.267358	0.199223	0.238971	0.244396	0.738847	0.807559	689	44	855	87	42.75	SIEMENS NM	166.177	0.523848	0.236826	0.260842	-1.34384	9513.38	321	3785.71	161		2015-08-06	65.3142	99.9261	0.914625	0.998653	0.795638	0.998653	0.220775	0.234362	0.588124	0.214533	0.169305	0.259761
0603552064			061Y	2016-06-27	63.0957	99.9663	0.938849	0.999433	0.810394	0.999433	0.140259	0.230254	0.911014	0.247514	0.27573	0.219298	0.240999	0.245205	0.761502	0.820835	1016	19	638	59	62.875	SIEMENS NM	156.889	0.375006	0.23043	0.258592	-1.3525	6857.07	321	2530.55	161		2016-11-28	63.2315	99.8238	0.952555	0.994249	0.838901	0.994249	0.169817	0.230254	0.917633	0.241132	0.211727	0.270537
2910525244			062Y	2015-08-10	67.6667	100.072	0.958924	0.989906	0.910397	0.989906	0.143658	0.254046	0.67575	0.24057	0.205532	0.275608	0.246935	0.242402	0.854377	0.779017	882	0	604	68	56.125	SIEMENS NM	161.897	0.484648	0.251886	0.274684	-1.29213	10270.9	344	3320.93	194		2017-02-01	73.5869	100.109	0.916824	0.999976	0.788423	0.999976	0.121611	0.254046	0.647937	0.239467	0.261201	0.217734
0805745688			041Y	2015-05-15	59.5137	99.8949	0.9725	0.99403	0.939072	0.99403	0.217404	0.277108	0.60916	0.240348	0.245467	0.235229	0.239243	0.240161	0.741737	0.751801	769	8	535	78	47.3125	SIEMENS NM	165.218	0.57916	0.269777	0.255419	-1.36485	6005	330	2431.2	162		2016-04-11	62.4839	99.9659	0.903337	0.999938	0.821889	0.999938	0.187957	0.277108	0.653417	0.237461	0.237283	0.23764
0709592086			055Y	2014-11-10	66.9943	100.083	0.945673	0.996339	0.850979	0.996339	0.170017	0.25477	0.601637	0.273854	0.250393	0.297316	0.246341	0.243152	0.841864	0.789167	952	30	571	63	59.75	SIEMENS NM	169.85	0.560714	0.253858	0.290399	-1.2365	6649.68	323	2194.77	161		2016-06-08	63.1601	100.075	0.929926	0.998001	0.816712	0.998001	0.13194	0.25477	0.530139	0.217772	0.219807	0.215736
2712910923			026Y	2018-08-15	70.1384	99.9161	0.926497	0.999566	0.876194	0.999566	0.0918005	0.22778	0.606083	0.244358	0.261208	0.227508	0.24153	0.244098	0.76792	0.802949	833	17	632	72	51.75	SIEMENS NM	166.772	0.578766	0.246672	0.289085	-1.24103	6472.71	326	1932.85	163		2019-01-09	63.7092	99.9394	0.870839	0.998846	0.795442	0.998846	0.124436	0.22778	0.587493	0.228305	0.208981	0.24763
2106750625			037Y	2013-03-22	69.305	100.048	0.988415	0.999555	0.954317	0.999555	0.230294	0.25345	0.608296	0.218985	0.242078	0.195891	0.239567	0.243258	0.745232	0.790646	779	67	908	77	49.6875	SIEMENS NM	161.061	0.453375	0.26066	0.222656	-1.50213	5164.47	322	1585.23	161		2014-03-07	54.9155	99.9999	0.987212	0.948319	0.968561	0.948319	0.192164	0.25345	0.699806	0.221297	0.215931	0.226663
1810672082			045Y	2012-11-12	68.7348	99.9342	0.946499	0.999993	0.857524	0.999993	0.123782	0.255989	0.798891	0.222776	0.24576	0.199793	0.241016	0.244432	0.761697	0.808118	833	51	613	72	47.2188	SIEMENS NM	162.697	0.569751	0.253786	0.316049	-1.15186	6275.13	323	1961.93	161		2013-06-27	64.6431	99.9487	0.93263	0.999972	0.794892	0.999972	0.127973	0.255989	0.789964	0.240386	0.26514	0.215632
1810792169			037Y	2017-06-29	61.8569	99.8706	0.958056	0.999287	0.885466	0.999287	0.260534	0.234754	0.80844	0.22959	0.217497	0.241683	0.242276	0.240296	0.777362	0.753335	759	1	968	79	46.8125	SIEMENS NM	172.474	0.248117	0.231072	0.210137	-1.56	5866.91	318	2237.82	160		2018-03-08	61.5397	99.8748	0.94306	0.997316	0.866967	0.997316	0.236263	0.234754	0.818867	0.227098	0.205118	0.249077
0808582232			057Y	2016-06-02	49.3079	99.8272	0.983803	0.928272	0.959269	0.928272	0.157367	0.248215	0.453682	0.22194	0.193893	0.249987	0.241389	0.236335	0.766194	0.712877	659	89	662	91	40.9688	SIEMENS NM	161.908	0.148607	0.244471	0.179637	-1.71682	11624.5	323	5892.7	160		2017-04-18	50.9626	99.8325	0.965846	0.980867	0.926538	0.980867	0.210861	0.248215	0.485418	0.221944	0.252128	0.191761
1909612022			056Y	2017-11-30	62.1773	99.808	0.873601	1	0.758502	1	0.168226	0.233223	0.765873	0.23555	0.201426	0.269674	0.244852	0.239569	0.814888	0.745246	1111	80	854	54	69.1875	SIEMENS NM	163.547	0.214955	0.235484	0.239941	-1.42736	9218.09	322	3486.53	164		2018-07-02	61.4161	99.7949	0.885728	0.999971	0.708012	0.999971	0.149991	0.233223	0.734106	0.238574	0.201107	0.276042
2608472060			070Y	2018-07-03	61.3231	99.8328	0.897235	0.999993	0.779599	0.999993	0.253693	0.234305	0.559344	0.230984	0.229082	0.232887	0.242313	0.242016	0.777852	0.774014	1000	35	818	60	62.5625	SIEMENS NM	176.678	0.244332	0.234858	0.203346	-1.59284	8761.09	319	3388.51	164		2019-04-01	60.7094	99.8457	0.899601	0.994672	0.742704	0.994672	0.255591	0.234305	0.732192	0.23705	0.233042	0.241057
0711782164			037Y	2016-10-14	73.5496	99.993	0.936047	0.99989	0.81333	0.99989	0.197667	0.252066	0.710506	0.234202	0.217088	0.251316	0.246027	0.243847	0.835711	0.799175	740	67	767	81	42.5	SIEMENS NM	169	0.236957	0.254265	0.273144	-1.29776	4671	324	1235.5	163		2017-01-16	69.9023	100.055	0.953051	0.999447	0.872498	0.999447	0.120517	0.252066	0.682511	0.241056	0.170831	0.311282
2807542042			061Y	2016-06-29	57.0625	99.9142	0.956092	0.98448	0.885836	0.98448	0.235232	0.241208	0.517511	0.230811	0.228892	0.232731	0.245161	0.244918	0.820072	0.815988	652	7	1239	92	40.5625	SIEMENS NM	166.208	0.232863	0.239409	0.203011	-1.5945	8621.29	321	3701.76	158		2017-01-24	48.0833	99.8627	0.990751	0.889635	0.97547	0.889635	0.134743	0.241208	0.45714	0.255519	0.2507	0.260338
0705792129			036Y	2015-09-10	66.6828	99.9126	0.906748	0.999661	0.750094	0.999661	0.122913	0.247408	0.864731	0.224332	0.221107	0.227557	0.242449	0.241949	0.779624	0.773169	952	21	607	63	58.125	SIEMENS NM	159.877	0.181276	0.248506	0.253353	-1.37297	6216	323	2071	167		2016-05-19	60.1735	99.8414	0.880943	0.994737	0.702385	0.994737	0.135648	0.247408	0.944601	0.235498	0.216259	0.254737
3009612133			055Y	2017-01-27	80.1528	99.9963	0.970711	0.998218	0.880849	0.998218	0.148136	0.262162	0.529154	0.213897	0.25044	0.177355	0.238335	0.244145	0.732268	0.803668	705	7	743	85	43.6875	SIEMENS NM	170.687	0.557514	0.261646	0.288005	-1.24478	4315.47	322	856.5	165		2017-06-06	76.1768	100.042	0.94527	0.999447	0.876189	0.999447	0.156368	0.262162	0.459277	0.227036	0.245516	0.208555
1908592109			057Y	2017-01-27	63.7501	99.9278	0.961975	0.997059	0.892504	0.997059	0.16274	0.225261	0.847447	0.215569	0.251998	0.17914	0.236249	0.242586	0.712089	0.781449	750	23	728	80	46.9375	SIEMENS NM	165.958	0.533295	0.224676	0.28314	-1.26182	5751.73	329	2085	165		2017-05-25	57.3296	99.8791	0.974119	0.979126	0.903503	0.979126	0.161003	0.225261	0.685299	0.22524	0.229367	0.221113
1308512023			064Y	2016-07-18	58.5787	99.8971	0.87592	0.99901	0.798702	0.99901	0.154855	0.251475	0.621341	0.221988	0.247136	0.19684	0.238609	0.24279	0.735078	0.784186	810	0	752	74	50.2812	SIEMENS NM	160.108	0.210899	0.252961	0.241813	-1.41959	10438.6	324	4323.8	162		2017-04-04	57.866	99.9087	0.917863	0.998424	0.857271	0.998424	0.137996	0.251475	0.597157	0.253671	0.233976	0.273366
0404502067			066Y	2016-06-01	58.8464	99.8602	0.937801	0.993427	0.912114	0.993427	0.261726	0.245844	0.583813	0.230785	0.213057	0.248513	0.244473	0.241883	0.808764	0.772325	789	2	867	76	49.625	SIEMENS NM	174.481	0.247174	0.238743	0.208485	-1.56789	9735.64	325	4006.56	159		2017-02-20	60.0016	99.8754	0.950818	0.99725	0.881241	0.99725	0.135164	0.245844	0.560315	0.235815	0.231606	0.240024
1406432334			073Y	2017-02-21	66.9337	99.8324	0.894773	0.998669	0.773103	0.998669	0.224438	0.243564	0.629094	0.216394	0.219762	0.213025	0.239582	0.240163	0.745387	0.751823	923	5	754	65	57.3125	SIEMENS NM	170.882	0.217954	0.242993	0.230953	-1.46554	6248.87	326	2066.27	158		2017-08-23	62.8941	99.7897	0.893067	0.99946	0.755726	0.99946	0.204475	0.243564	0.629369	0.237661	0.25917	0.216153
1603472282			065Y	2012-10-24	62.1143	100.459	0.974887	0.997503	0.97831	0.997503	0.223268	0.229897	0.495392	0.200696	0.253947	0.147444	0.23413	0.243381	0.693405	0.792393	1016	0	323	59	62.625	SIEMENS NM	171.227	0.4536	0.232529	0.161766	-1.8216	6890.53	323	2610.53	158		2013-03-15	60.4903	99.9771	0.848674	0.997503	0.743672	0.997503	0.141367	0.229897	0.49978	0.236776	0.228699	0.244853
2610542364			061Y	2015-12-14	66.5321	99.8497	0.911518	0.999937	0.802707	0.999937	0.182913	0.249637	1.00817	0.238792	0.235713	0.241872	0.243463	0.243008	0.793565	0.78717	895	1	783	67	55.2188	SIEMENS NM	161.544	0.192752	0.242503	0.249767	-1.38723	7231.6	321	2420.27	161		2016-08-15	66.1465	99.889	0.91209	0.999827	0.758379	0.999827	0.113763	0.249637	0.98691	0.236425	0.217283	0.255567
1705552188			060Y	2016-01-27	57.5012	99.8567	0.973958	0.969857	0.927981	0.969857	0.191441	0.25804	0.536955	0.222686	0.227184	0.218189	0.24052	0.241265	0.755895	0.764693	821	10	884	73	50.25	SIEMENS NM	165.765	0.198666	0.272117	0.185569	-1.68433	9266.94	324	3938.34	156		2016-10-17	58.123	99.8713	0.888908	0.992329	0.808732	0.992329	0.139954	0.25804	0.676019	0.240304	0.221451	0.259157
2601712147			044Y	2015-12-17	64.5124	99.9605	0.863093	0.997023	0.711832	0.997023	0.178314	0.237556	0.637858	0.251755	0.217207	0.286303	0.247335	0.243022	0.863587	0.787359	1176	34	452	51	73.3125	SIEMENS NM	166.86	0.245912	0.241229	0.223339	-1.49907	9689.53	327	3438.58	161		2016-09-09	62.8864	99.9479	0.821129	0.996087	0.68157	0.996087	0.145133	0.237556	0.569612	0.216499	0.20992	0.223078
1511788089			038Y	2017-02-27	77.1312	100.117	0.934727	0.998283	0.780932	0.998283	0.0965206	0.249731	0.68074	0.246798	0.223208	0.270388	0.247134	0.244342	0.858871	0.806706	923	71	517	65	57.3125	SIEMENS NM	154.217	0.426364	0.268727	0.26836	-1.31543	6041.13	328	1381.53	172		2017-09-21	72.6601	100.147	0.942868	0.995961	0.831628	0.995961	0.134559	0.249731	0.593069	0.221673	0.232885	0.21046
1211962164			019Y	2016-10-18	63.5105	99.9437	0.889602	0.999543	0.761736	0.999543	0.217799	0.242533	0.631438	0.252921	0.250228	0.255613	0.244545	0.244173	0.809913	0.804097	759	96	860	79	47.0938	SIEMENS NM	182.734	0.228367	0.255451	0.225323	-1.49022	7731	318	2821	159		2017-02-06	61.0011	99.9329	0.927892	0.995727	0.763417	0.995727	0.224968	0.242533	0.642965	0.247853	0.22967	0.266036
2009735943			043Y	2016-10-05	60.3901	99.9599	0.926036	0.998001	0.856549	0.998001	0.218594	0.25727	0.605971	0.22466	0.194915	0.254404	0.242666	0.237576	0.782512	0.724691	833	2	774	72	52.8438	SIEMENS NM	175.351	0.25121	0.250431	0.241919	-1.41915	7867.28	323	3116.23	163		2017-02-27	59.0259	100.189	0.938582	0.99255	0.848398	0.99255	0.13892	0.25727	0.537986	0.265568	0.225435	0.3057
1110602081			056Y	2017-02-28	64.6383	99.8809	0.866225	0.99944	0.752601	0.99944	0.190581	0.227974	0.727337	0.242975	0.232055	0.253894	0.240046	0.238028	0.750513	0.72917	631	4	1433	95	39.375	SIEMENS NM	167.987	0.49408	0.228782	0.274491	-1.29284	9103.67	323	3219.22	160		2017-11-21	55.2837	99.8331	0.919372	0.993883	0.854764	0.993883	0.201946	0.227974	0.524115	0.238039	0.249087	0.226991
1104702460			046Y	2017-03-02	65.6196	99.8616	0.923883	0.999142	0.78359	0.999142	0.0997776	0.228523	0.753435	0.231525	0.216819	0.24623	0.24236	0.23993	0.778456	0.749223	1000	106	483	60	63.125	SIEMENS NM	167.343	0.591057	0.224173	0.334772	-1.09431	6620.11	319	2276.02	168		2017-10-02	62.9314	99.9015	0.865848	0.999657	0.769972	0.999657	0.209952	0.228523	0.702603	0.243546	0.217004	0.270088
1701622424			054Y	2016-10-27	67.7654	99.8417	0.95594	0.996428	0.883503	0.996428	0.207774	0.249218	0.518129	0.230428	0.242016	0.21884	0.243357	0.244935	0.79205	0.816268	759	19	626	79	48.0938	SIEMENS NM	163.784	0.207224	0.249309	0.19887	-1.6151	6700.23	327	2159.79	164		2017-03-02	70.4921	99.8313	0.936488	0.999034	0.841372	0.999034	0.109961	0.249218	0.555519	0.246682	0.252962	0.240403
2406552209			061Y	2016-08-02	60.597	99.8854	0.95409	0.998619	0.874486	0.998619	0.235569	0.23084	0.630838	0.21251	0.187997	0.237022	0.240597	0.236141	0.756789	0.711097	857	0	698	70	53.7188	SIEMENS NM	165.865	0.244418	0.231759	0.205166	-1.58394	7747.48	320	3052.74	160		2017-06-05	64.3548	99.9071	0.929619	0.999163	0.816048	0.999163	0.187689	0.23084	0.618623	0.223706	0.21554	0.231872
1701522152			063Y	2015-07-29	78.5807	99.8397	0.846077	0.999753	0.754355	0.999753	0.0801804	0.249682	0.645751	0.229914	0.223519	0.236309	0.24363	0.242693	0.795986	0.782874	895	2	530	67	54.7188	SIEMENS NM	153.316	0.162275	0.249126	0.275801	-1.28807	7151.89	324	1531.89	165		2016-05-30	68.5465	99.8538	0.859014	0.999884	0.723754	0.999884	0.125064	0.249682	0.851152	0.223079	0.174951	0.271208
0105582239			056Y	2014-10-03	64.4108	99.8577	0.904807	0.999184	0.605263	0.999184	0.148975	0.232975	0.742162	0.221907	0.21113	0.232684	0.240839	0.238971	0.759607	0.738853	937	0	650	64	58.25	SIEMENS NM	152.44	0.317523	0.237564	0.341294	-1.07501	7856.7	327	2796.13	158		2015-02-25	61.4962	99.8856	0.901441	0.999163	0.760443	0.999163	0.180982	0.232975	0.560301	0.217167	0.223798	0.210536
0110622480			051Y	2013-12-10	66.092	99.874	0.909806	0.999022	0.747586	0.999022	0.237371	0.234622	0.700463	0.234674	0.254641	0.214708	0.242371	0.245175	0.778603	0.820316	845	37	860	71	51.6563	SIEMENS NM	167.923	0.226002	0.23543	0.206417	-1.57786	6806.66	326	2308	159		2014-09-01	59.3018	99.8314	0.887707	0.991513	0.796779	0.991513	0.161479	0.234622	0.613244	0.251577	0.195779	0.307376
0707642108			048Y	2013-05-17	89.3101	100.583	0.971099	0.999756	0.909353	0.999756	0.248504	0.274999	0.637385	0.26612	0.291309	0.24093	0.2395	0.243729	0.744504	0.797428	1016	9	479	59	67.7812	SIEMENS NM	167.666	0.588082	0.274054	0.225689	-1.4886	3227.33	326	345	165		2014-03-18	71.0753	100.259	0.958258	0.999163	0.899077	0.999163	0.203446	0.274999	0.651788	0.235372	0.212482	0.258261
0301582203			057Y	2015-01-06	67.8301	99.9045	0.88871	1	0.814516	1	0.191712	0.237251	0.588942	0.25853	0.234583	0.282478	0.244502	0.240752	0.809225	0.758589	555	14	1415	108	34.5	SIEMENS NM	167.015	0.592173	0.24849	0.28161	-1.26723	8829.59	324	2840.47	164		2015-09-21	62.8628	99.9588	0.860621	0.999426	0.749892	0.999426	0.192718	0.237251	0.56751	0.235057	0.247449	0.222665
2501972112			017Y	2015-01-08	70.1111	99.95	0.827874	0.997563	0.676525	0.997563	0.192348	0.234102	0.493202	0.236851	0.265448	0.208254	0.239448	0.244026	0.743938	0.801862	1276	71	341	47	80	SIEMENS NM	173.12	0.223552	0.234945	0.232332	-1.45959	7531.1	327	2250.97	161		2015-04-30	64.2376	99.9545	0.945883	0.997023	0.869535	0.997023	0.166597	0.234102	0.53866	0.258201	0.215619	0.300783
0606632026			051Y	2015-01-08	61.9668	99.8738	0.874899	0.997593	0.817989	0.997593	0.134537	0.233036	0.463259	0.222309	0.214444	0.230174	0.246238	0.24533	0.839803	0.822987	821	8	1159	73	50.9375	SIEMENS NM	162.387	0.151345	0.228997	0.255587	-1.36419	13415.4	329	5102.29	158		2015-07-14	60.9309	99.8549	0.84075	0.999938	0.773163	0.999938	0.211056	0.233036	0.479634	0.233605	0.241555	0.225656
0804532044			061Y	2014-12-08	56.8572	99.8895	0.906164	0.98863	0.831612	0.98863	0.0930079	0.263783	0.6004	0.251343	0.287442	0.215244	0.236023	0.242624	0.710013	0.781953	983	10	714	61	61.75	SIEMENS NM	159.301	0.621286	0.264343	0.351024	-1.0469	9003.95	327	3884.56	161		2015-11-09	66.5968	100.007	0.957591	0.998701	0.858028	0.998701	0.0864727	0.263783	0.7012	0.245289	0.245983	0.244595
1210692120			043Y	2013-07-05	64.2355	99.9939	0.930719	0.999972	0.824466	0.999972	0.20037	0.259661	0.669017	0.250897	0.208948	0.292846	0.245264	0.238571	0.821852	0.734688	1034	155	494	58	63.7813	SIEMENS NM	166.888	0.579544	0.249236	0.311262	-1.16712	5772.2	322	2064.4	164		2014-02-24	61.6832	100.024	0.928627	0.998001	0.774679	0.998001	0.13433	0.259661	0.890779	0.247963	0.222611	0.273315
0505602326			053Y	2013-08-19	60.5108	99.8674	0.941416	0.993072	0.84043	0.993072	0.125759	0.26959	0.669086	0.242076	0.258423	0.22573	0.238908	0.241756	0.738186	0.77073	869	24	695	69	54.0625	SIEMENS NM	157.182	0.554631	0.268333	0.306735	-1.18177	7549.4	337	2981.2	161		2014-05-08	58.7679	99.8418	0.893245	0.999827	0.787241	0.999827	0.0963906	0.26959	0.647199	0.261287	0.20329	0.319284
1008692182			045Y	2015-03-23	61.2169	99.8666	0.969167	0.99663	0.807426	0.99663	0.259823	0.249174	0.718899	0.220849	0.20479	0.236908	0.243853	0.241453	0.79926	0.766979	800	393	1623	75	47.0312	SIEMENS NM	179.449	0.246536	0.248891	0.216306	-1.53106	5229.39	322	2028.12	160		2016-01-14	59.0645	99.8595	0.95267	0.992952	0.89885	0.992952	0.250079	0.249174	0.734541	0.219226	0.258932	0.17952
3110652005			053Y	2019-04-01	61.883	100.053	0.890562	0.999973	0.79779	0.999973	0.143949	0.222626	0.564319	0.252355	0.267792	0.236918	0.240679	0.243189	0.757734	0.789685	937	3	621	64	58.5	SIEMENS NM	167.316	0.564095	0.241298	0.29603	-1.21729	11981.2	328	4566.86	170		2019-10-28	61.6403	99.9808	0.853965	0.999632	0.702538	0.999632	0.0773894	0.222626	0.614055	0.186708	0.2395	0.133915
0404482201			065Y	2014-03-17	72.6724	99.9857	0.938481	0.999825	0.836538	0.999825	0.179373	0.255597	0.68734	0.23082	0.216201	0.245439	0.244105	0.241944	0.803062	0.773106	697	2	574	86	41.5312	SIEMENS NM	161.596	0.321274	0.253203	0.243728	-1.4117	6222.71	321	1700.52	163		2014-10-29	71.5685	100.063	0.922605	0.998444	0.794618	0.998444	0.186235	0.255597	0.657335	0.256547	0.194835	0.318259
1903552087			059Y	2014-12-01	60.2532	99.8953	0.961175	0.993807	0.903098	0.993807	0.175608	0.235754	0.63685	0.232019	0.24497	0.219068	0.245184	0.246669	0.820469	0.848616	681	5	914	88	42.4688	SIEMENS NM	176.854	0.578906	0.254816	0.315378	-1.15398	8286.12	324	3293.47	157		2014-05-13	63.6932	99.944	0.962128	0.993729	0.877783	0.993729	0.192532	0.235754	0.566564	0.21868	0.232717	0.204644
0608770604			037Y	2014-09-09	66.6984	100.031	0.921082	0.994539	0.792171	0.994539	0.201554	0.255372	0.533811	0.234019	0.251057	0.216981	0.241009	0.24365	0.761625	0.796279	909	4	507	66	56.7188	SIEMENS NM	167.167	0.542679	0.259529	0.295825	-1.21799	7004.67	322	2332.67	163		2015-04-07	73.9467	100.049	0.948592	0.997349	0.807493	0.997349	0.142029	0.255372	0.577779	0.222833	0.222745	0.222921
3011552207			059Y	2015-11-02	80.6729	100.107	0.946066	0.99946	0.846246	0.99946	0.146802	0.243517	0.608231	0.223636	0.221286	0.225986	0.242778	0.242423	0.784025	0.779293	1034	9	461	58	65.9062	SIEMENS NM	161.092	0.592742	0.243394	0.285865	-1.25223	4041.14	329	781.034	162		2015-11-02	80.6729	100.107	0.946066	0.99946	0.846246	0.99946	0.146802	0.243517	0.651821	0.223636	0.221286	0.225986
0108672468			047Y	2015-01-14	81.731	99.8523	0.94728	0.49763	0.845125	0.49763	0.116914	0.260765	0.608231	0.24867	0.264467	0.232873	0.238954	0.24173	0.738676	0.770406	800	33	601	75	50.2812	SIEMENS NM	162.532	0.499206	0.26277	0.309228	-1.17368	3150.24	119	575.517	23		2015-08-18	56.1537	99.8439	0.939325	0.963746	0.890383	0.963746	0.16516	0.260765	0.587578	0.240507	0.242882	0.238133
1305622162			052Y	2014-12-19	72.313	99.8663	0.864851	0.999726	0.740172	0.999726	0.155748	0.238498	0.57819	0.472731	0.518904	0.426558	0.219848	0.236034	0.595757	0.710112	779	7	936	77	47.375	SIEMENS NM	161.135	0.591287	0.241653	0.311214	-1.16727	9133.9	359	2528.9	179		2015-08-18	63.8902	99.8844	0.888891	0.999891	0.765441	0.999891	0.189536	0.238498	0.60792	0.266145	0.2801	0.252191
0712522107			062Y	2015-04-23	63.5799	99.8957	0.947053	0.987844	0.867208	0.987844	0.216944	0.250643	0.525589	0.245784	0.255958	0.23561	0.242918	0.244388	0.78593	0.807424	750	1	606	80	47.2812	SIEMENS NM	159.486	0.632956	0.250885	0.295631	-1.21864	7176.8	324	2613.8	159		2015-11-10	60.9727	99.917	0.956109	0.997533	0.890795	0.997533	0.213004	0.250643	0.464889	0.233167	0.2337	0.232634
1207522023			065Y	2018-02-22	64.2633	99.965	0.84272	0.999022	0.783316	0.999022	0.159253	0.227376	0.539218	0.224716	0.230037	0.219394	0.241875	0.242695	0.772227	0.782902	789	16	842	76	48.9375	SIEMENS NM	167.806	0.155615	0.230483	0.230049	-1.46946	13075.4	326	4672.71	159		2018-10-09	58.6823	99.9172	0.870877	0.999889	0.798592	0.999889	0.171344	0.227376	0.51113	0.251295	0.243003	0.259588
0309702305			047Y	2017-11-13	67.8942	99.9667	0.921221	0.998025	0.744141	0.998025	0.183469	0.251683	0.818258	0.256223	0.202876	0.30957	0.248575	0.242344	0.898519	0.778254	705	2	1783	85	43.875	SIEMENS NM	165.805	0.427594	0.246621	0.293806	-1.22484	5640.83	325	1811.03	157		2018-07-16	59.2061	99.9166	0.918466	0.993507	0.738947	0.993507	0.152955	0.251683	0.814985	0.184251	0.267667	0.100836
0201622246			055Y	2017-09-18	67.5457	99.8665	0.886195	0.999938	0.727386	0.999938	0.146024	0.240377	0.76548	0.240394	0.282751	0.198037	0.239015	0.245536	0.739316	0.826635	1071	24	779	56	66.875	SIEMENS NM	172.946	0.412483	0.242179	0.271906	-1.3023	6856.1	323	2225.1	163		2018-05-31	64.9289	99.8882	0.872224	0.999669	0.68507	0.999669	0.210689	0.240377	0.687614	0.240506	0.268703	0.212309
1702585506			060Y	2018-02-28	62.3061	99.9776	0.94155	0.999827	0.840987	0.999827	0.163857	0.23881	0.705897	0.276196	0.222853	0.329538	0.245671	0.236591	0.829075	0.715261	740	2	939	81	46.1875	SIEMENS NM	168.003	0.572289	0.235363	0.28925	-1.24046	9171.44	323	3457.07	165		2018-12-17	61.8128	99.9527	0.862233	0.999153	0.793983	0.999153	0.172037	0.23881	0.464725	0.242224	0.2129	0.271547
1911712063			046Y	2018-06-05	62.9458	100.051	0.917939	0.999277	0.810766	0.999277	0.202352	0.233759	0.583378	0.226842	0.206536	0.247149	0.244135	0.241074	0.803519	0.762391	1000	2	531	60	61.6875	SIEMENS NM	167.061	0.60916	0.249164	0.278661	-1.27776	8079.87	316	2993.93	158		2019-01-08	64.9838	99.9581	0.886064	0.996905	0.787063	0.996905	0.17188	0.233759	0.562772	0.301502	0.226491	0.376514
0506742121			042Y	2017-02-17	64.0579	99.8859	0.919478	0.996428	0.804866	0.996428	0.201383	0.226745	0.590609	0.200968	0.180935	0.221	0.24203	0.238729	0.774194	0.736324	789	0	859	76	49.1875	SIEMENS NM	171.24	0.361287	0.226447	0.263189	-1.33488	5683.76	327	2042.86	162		2017-08-17	58.5067	99.8527	0.961503	0.994388	0.628235	0.994388	0.195529	0.226745	0.648832	0.243125	0.239062	0.247188
1705935648			024Y	2018-03-05	67.1254	100.084	0.971047	0.997023	0.900346	0.997023	0.130679	0.256512	0.727787	0.277573	0.232969	0.322178	0.241738	0.232606	0.770503	0.68089	882	250	649	68	55.9375	SIEMENS NM	157.677	0.578292	0.260243	0.29931	-1.20628	4737.3	327	1557.37	163		2018-04-30	61.6888	100.013	0.967173	0.99562	0.878445	0.99562	0.150358	0.256512	0.838513	0.212856	0.178728	0.246984
0806692103			048Y	2017-12-05	59.3568	99.9323	0.961436	0.992169	0.890135	0.992169	0.174357	0.23779	0.605323	0.250792	0.258684	0.242901	0.244944	0.245926	0.816409	0.83379	869	29	615	69	54.1875	SIEMENS NM	162.549	0.574697	0.237067	0.282909	-1.26263	6923.11	317	2813.77	161		2018-10-29	57.5259	99.9873	0.953014	0.983126	0.911408	0.983126	0.229658	0.23779	0.510524	0.226907	0.171067	0.282747
2804662160			051Y	2017-09-13	64.0062	99.8492	0.92464	0.999972	0.805939	0.999972	0.206391	0.253178	0.734527	0.230135	0.223453	0.236817	0.240358	0.23918	0.754037	0.74106	759	10	1713	79	46.9375	SIEMENS NM	166	0.561119	0.256988	0.303081	-1.19376	6419.16	322	2310.5	160		2018-03-06	56.0823	99.8546	0.971111	0.993091	0.873353	0.993091	0.233568	0.253178	0.650439	0.229496	0.22361	0.235383
1311612203			051Y	2012-11-22	65.014	100.037	0.951288	0.99725	0.886046	0.99725	0.207653	0.244778	0.792599	0.226396	0.231603	0.221189	0.238914	0.239843	0.738248	0.748254	545	13	814	110	33.375	SIEMENS NM	164.232	0.544786	0.243317	0.279758	-1.27383	8954.18	324	3132.71	157		2013-06-17	67.678	99.9933	0.93026	1	0.824951	1	0.184502	0.244778	0.854256	0.237879	0.226825	0.248933
2503792189			038Y	2017-05-04	68.649	99.9838	0.907617	0.999184	0.783806	0.999184	0.118204	0.249629	0.592388	0.221896	0.251081	0.192711	0.241181	0.245342	0.763681	0.823202	1153	17	450	52	71.1875	SIEMENS NM	163.364	0.615619	0.243005	0.334637	-1.09471	5690.2	327	1783.93	166		2018-01-09	58.9497	99.9677	0.949386	0.983002	0.882663	0.983002	0.118597	0.249629	0.598161	0.250746	0.292803	0.20869
2603690949			047Y	2016-10-19	64.4004	99.822	0.873995	0.99975	0.760896	0.99975	0.0918978	0.255863	0.714838	0.238643	0.195306	0.281979	0.243881	0.236407	0.799675	0.713543	967	4	646	62	59.8438	SIEMENS NM	157.311	0.190588	0.255052	0.279073	-1.27628	9781	322	3482	165		2017-07-11	62.8295	99.8122	0.825451	0.99989	0.693971	0.99989	0.169804	0.255863	0.758008	0.458113	0.544253	0.371974
2011642248			051Y	2016-04-01	59.9828	100.001	0.940901	0.999131	0.864711	0.999131	0.211929	0.239389	0.573748	0.242296	0.252947	0.231644	0.242224	0.243824	0.776689	0.798838	909	27	626	66	56.6562	SIEMENS NM	169.922	0.571322	0.235114	0.279359	-1.27526	8560.57	317	3425.71	160		2016-11-29	54.2401	100.035	0.959337	0.999831	0.916143	0.999831	0.183601	0.239389	0.632268	0.231274	0.238683	0.223864
2801672165			050Y	2018-01-17	62.042	99.8737	0.874043	0.998985	0.807141	0.998985	0.218421	0.262603	0.568384	0.220888	0.193756	0.24802	0.237146	0.231475	0.72052	0.672027	923	52	1256	65	57.1875	SIEMENS NM	168.539	0.206895	0.267096	0.249387	-1.38875	10266.7	320	3897.03	161		2018-07-23	63.203	99.8682	0.886027	0.993507	0.748342	0.993507	0.161461	0.262603	0.560438	0.230692	0.202452	0.258932
1305382307			074Y	2012-10-17	65.0368	99.8533	0.959445	0.999543	0.908553	0.999543	0.274373	0.247479	0.794827	0.209259	0.207592	0.210925	0.240839	0.240565	0.759608	0.756413	895	4	207	67	55.9375	SIEMENS NM	167.247	0.450932	0.245167	0.156791	-1.85284	4261.34	318	1489.9	161		2013-04-02	57.8169	99.8483	0.926897	0.993883	0.835771	0.993883	0.179836	0.247479	0.651218	0.219448	0.229909	0.208987
0908742002			043Y	2018-07-24	57.655	99.8507	0.953362	0.987693	0.845586	0.987693	0.214636	0.240064	0.461124	0.244847	0.236828	0.252866	0.237996	0.236405	0.728848	0.713532	769	2	1394	78	47.875	SIEMENS NM	178.558	0.50605	0.23966	0.283625	-1.2601	4881.8	322	2067.2	158		2018-09-12	54.7548	99.8053	0.947094	0.97655	0.85197	0.97655	0.191539	0.240064	0.595743	0.242929	0.225335	0.260523
0908402066			077Y	2018-07-25	64.229	99.895	0.916038	0.999538	0.863683	0.999538	0.23832	0.234466	0.504491	0.251185	0.240808	0.261562	0.244146	0.242605	0.803677	0.781706	1000	350	632	60	48.5	SIEMENS NM	173.882	0.360478	0.22881	0.250199	-1.3855	7465.26	316	2670.4	160		2019-03-11	65.8943	99.925	0.839598	0.997283	0.741532	0.997283	0.226218	0.234466	0.539133	0.242017	0.236423	0.247611
3006742001			042Y	2017-04-05	61.8815	100.15	0.900915	0.998001	0.863355	0.998001	0.143602	0.254199	0.497716	0.274179	0.208852	0.339507	0.249561	0.242981	0.942437	0.786797	833	201	751	72	51.1875	SIEMENS NM	160.017	0.579629	0.252957	0.299653	-1.20513	11154.1	323	4251.76	160		2017-12-18	60.5745	99.9825	0.900986	0.998218	0.84391	0.998218	0.17376	0.254199	0.530776	0.261656	0.235931	0.287382
0201700603			047Y	2017-12-20	60.8337	99.801	0.925163	0.999669	0.761175	0.999669	0.171171	0.247458	0.78307	0.242759	0.213954	0.271563	0.244964	0.240606	0.816753	0.756892	882	8	846	68	54.3125	SIEMENS NM	164.236	0.22858	0.250625	0.248952	-1.3905	7299.9	327	2859.1	163		2018-07-30	60.0885	99.7875	0.927746	0.998998	0.840662	0.998998	0.149206	0.247458	0.787487	0.230489	0.21282	0.248159
2107532222			064Y	2018-05-15	64.6945	100.068	0.949539	0.998787	0.905549	0.998787	0.207754	0.21869	0.568088	0.233643	0.240709	0.226576	0.241343	0.242468	0.765631	0.779882	810	8	725	74	50.375	SIEMENS NM	160.899	0.590304	0.215167	0.298989	-1.20735	8780.08	317	3099.85	161		2019-02-01	66.3729	100.013	0.941302	0.997503	0.900931	0.997503	0.202222	0.21869	0.507796	0.241004	0.250455	0.231554
0211592048			058Y	2018-07-31	64.9213	99.9196	0.967764	0.999993	0.914691	0.999993	0.138909	0.252198	0.732095	0.233815	0.230668	0.236963	0.244672	0.244251	0.811945	0.805301	705	34	1028	85	43.5625	SIEMENS NM	160.103	0.498025	0.247209	0.278669	-1.27773	6147.05	321	2156.3	160		2019-07-09	63.4093	99.8825	0.938578	0.999823	0.831819	0.999823	0.218315	0.252198	0.770093	0.223457	0.216945	0.229968
2307572228			060Y	2018-01-11	72.2535	99.914	0.934554	0.999746	0.765027	0.999746	0.234725	0.266091	0.659009	0.242075	0.233603	0.250547	0.245915	0.244868	0.833584	0.815154	967	0	604	62	59.5625	SIEMENS NM	175.863	0.240607	0.264721	0.216415	-1.53056	5239.33	320	1453.73	164		2018-08-02	64.2076	99.8971	0.907568	0.997772	0.751703	0.997772	0.2498	0.266091	0.551383	0.235827	0.243767	0.227888
2607402042			078Y	2018-08-06	66.7755	99.9991	0.946553	0.999993	0.849001	0.999993	0.183682	0.224773	0.730954	0.231116	0.225166	0.237065	0.241783	0.240807	0.771069	0.759228	909	13	870	66	56.125	SIEMENS NM	161.008	0.572229	0.217847	0.29057	-1.23591	7638.16	325	2537.74	165		2019-05-09	65.9864	99.9786	0.841264	0.996181	0.742798	0.996181	0.215961	0.224773	0.601056	0.23768	0.241337	0.234023
0804512213			062Y	2014-01-21	60.5929	99.9236	0.913886	0.998653	0.850451	0.998653	0.183797	0.238091	0.48019	0.209011	0.203232	0.214791	0.240599	0.239622	0.756807	0.745827	750	5	974	80	46.75	SIEMENS NM	165.35	0.176726	0.229471	0.230165	-1.46896	12079.9	324	4760.35	164		2017-10-26	60.0716	99.9058	0.920983	0.996949	0.861577	0.996949	0.194247	0.238091	0.501075	0.213749	0.238662	0.188836
2706482087			064Y	2013-01-23	68.1222	99.924	0.89711	0.999939	0.813985	0.999939	0.26614	0.254942	0.500635	0.250099	0.220508	0.27969	0.243545	0.238545	0.794754	0.734413	937	36	491	64	53.6875	SIEMENS NM	161.314	0.250103	0.276426	0.184363	-1.69085	6838.83	325	2180.07	164		2014-01-22	57.5289	99.9527	0.940699	0.998802	0.858894	0.998802	0.138789	0.254942	0.549805	0.231633	0.240461	0.222805
1107675936			070Y	2013-06-12	65.3005	99.5871	0.850566	0.999287	0.757189	0.999287	0.198859	0.148049	0.477094	0.248982	0.281627	0.216337	0.238935	0.24427	0.73847	0.805586	895	22	600	67	53.5625	SIEMENS NM	168.297	0.238115	0.145871	0.227511	-1.48056	12815.6	318	4446.96	157		2014-09-15	50.0926	99.5118	0.968173	0.37602	0.95721	0.37602	0.250536	0.148049	0.465952	0.245937	0.224931	0.266942
2012422063			070Y	2013-06-12	65.1973	99.9195	0.826302	0.999972	0.722946	0.999972	0.195321	0.269161	0.471711	0.245681	0.264901	0.22646	0.23943	0.242675	0.743741	0.782633	895	22	600	67	53.5625	SIEMENS NM	167.483	0.245542	0.264811	0.243367	-1.41318	13035.2	322	4536.6	161		2014-06-16	61.3585	99.9506	0.866163	0.997563	0.825387	0.997563	0.258034	0.269161	0.455224	0.225485	0.189516	0.261454
2805512049			062Y	2013-11-12	58.6724	99.9973	0.87051	0.999827	0.784065	0.999827	0.176495	0.266804	0.466593	0.463907	0.563364	0.364451	0.211477	0.244102	0.551681	0.803004	1034	2	520	58	62.6562	SIEMENS NM	160.459	0.56158	0.272904	0.295491	-1.21912	13415.3	323	5544.23	171		2014-01-20	57.1775	100.023	0.874075	0.999313	0.806035	0.999313	0.156335	0.266804	0.463464	0.228797	0.284837	0.172757
0711312060			080Y	2012-08-09	63.7704	99.8387	0.880993	0.998444	0.790421	0.998444	0.219446	0.257935	0.516363	0.239572	0.243436	0.235708	0.23924	0.239935	0.741703	0.74928	967	0	681	62	60.125	SIEMENS NM	165.878	0.233933	0.255547	0.195549	-1.63194	12115.6	323	4389.43	160		2013-02-04	61.7918	99.8165	0.889037	0.999433	0.847543	0.999433	0.227011	0.257935	0.593277	0.214457	0.217072	0.211841
0609772260			035Y	2013-03-08	64.0562	99.9819	0.91724	0.9882	0.843447	0.9882	0.209348	0.244137	0.413731	0.22871	0.246961	0.210459	0.24037	0.243263	0.754171	0.790728	833	50	479	72	48.8125	SIEMENS NM	164.509	0.220776	0.245817	0.215366	-1.53542	8312.8	321	2987.93	157		2013-10-28	63.8933	100.002	0.899932	0.997563	0.804116	0.997563	0.0998614	0.244137	0.421308	0.237397	0.233045	0.241749
0302502106			062Y	2013-01-10	61.2842	99.8956	0.877063	0.99975	0.753455	0.99975	0.178266	0.255794	0.606053	0.252449	0.288998	0.215899	0.238103	0.244229	0.729918	0.804961	952	35	1625	63	58.7188	SIEMENS NM	163.635	0.190315	0.253047	0.237348	-1.43823	8930.53	322	3457.53	163		2013-09-27	59.0554	99.905	0.893785	0.997283	0.786305	0.997283	0.124794	0.255794	0.638147	0.209948	0.232488	0.187407
1003635458			050Y	2013-05-01	58.6568	100.028	0.943451	0.98884	0.878974	0.98884	0.238038	0.232344	0.575499	0.243462	0.247941	0.238983	0.242336	0.243026	0.778144	0.787413	652	7	1003	92	41.75	SIEMENS NM	172.513	0.496303	0.231698	0.267943	-1.31698	8286.28	322	3425.81	158		2014-01-30	60.7809	100.076	0.943224	0.987693	0.878646	0.987693	0.266423	0.232344	0.460931	0.227638	0.236425	0.218851
2810522049			060Y	2012-12-14	65.6802	99.9378	0.944309	0.999973	0.851056	0.999973	0.188054	0.239456	0.580428	0.233111	0.213353	0.25287	0.242794	0.239532	0.784246	0.744849	821	16	1172	73	51.8438	SIEMENS NM	168.96	0.566009	0.241185	0.252704	-1.37554	7882.13	324	2705.13	165		2014-01-30	63.258	99.9735	0.872042	0.999163	0.748425	0.999163	0.221335	0.239456	0.516932	0.232301	0.211842	0.252759
1303502364			063Y	2014-02-05	66.6289	99.8491	0.906736	0.999971	0.704244	0.999971	0.214548	0.244848	0.67726	0.227662	0.216242	0.239081	0.242255	0.240393	0.777088	0.754443	1132	180	1043	53	70.375	SIEMENS NM	164.877	0.259792	0.245964	0.18192	-1.70419	6144.39	316	2050.45	162		2014-07-09	61.7826	99.8788	0.936233	0.999321	0.853503	0.999321	0.179926	0.244848	0.640027	0.240081	0.232612	0.247551
1109322100			081Y	2014-02-06	64.365	99.9005	0.929447	0.99663	0.840316	0.99663	0.217734	0.265079	0.436199	0.226341	0.244535	0.208147	0.236901	0.240247	0.718185	0.752777	1153	2	461	52	71.0312	SIEMENS NM	157.412	0.226987	0.261422	0.170029	-1.77178	11708.8	322	4172.43	160		2014-06-02	65.5715	99.9186	0.89641	0.997772	0.811581	0.997772	0.159004	0.265079	0.548313	0.218588	0.239583	0.197592
0210562498			057Y	2014-02-07	61.7497	99.9371	0.873428	0.995233	0.833373	0.995233	0.224686	0.230222	0.589287	0.219756	0.248559	0.190953	0.239848	0.244275	0.748311	0.805677	869	6	639	69	53.9062	SIEMENS NM	163.483	0.441396	0.227733	0.261411	-1.34166	9792.63	320	3745.71	156		2014-08-11	59.7508	99.9312	0.923707	0.98863	0.851344	0.98863	0.213355	0.230222	0.522809	0.224904	0.195827	0.253981
0412656272			047Y	2013-07-12	68.1846	99.8197	0.854855	0.998283	0.778638	0.998283	0.19509	0.243864	0.66393	0.230469	0.227894	0.233045	0.243389	0.243012	0.792512	0.787225	659	6	1046	91	41.3125	SIEMENS NM	162.088	0.194341	0.250623	0.228041	-1.47823	9154.65	328	2912.59	156		2014-02-20	68.7804	99.8337	0.794107	0.99975	0.652232	0.99975	0.187024	0.243864	0.628696	0.241074	0.255934	0.226214
2801502162			062Y	2012-11-15	68.692	99.914	0.91222	0.995727	0.832969	0.995727	0.220894	0.234337	0.643906	0.251863	0.258658	0.245069	0.241806	0.242886	0.771358	0.785497	857	188	553	70	55.6563	SIEMENS NM	169.481	0.237008	0.234603	0.174646	-1.74499	7590.06	325	2376.29	163		2013-11-25	60.4701	99.8935	0.879037	0.997023	0.824447	0.997023	0.161512	0.234337	0.534151	0.256163	0.256332	0.255995
2704682224			044Y	2012-08-13	67.9152	99.9942	0.843047	0.999973	0.68422	0.999973	0.208308	0.244233	0.64258	0.219049	0.216209	0.221888	0.242953	0.24253	0.786405	0.780707	882	25	1278	68	57	SIEMENS NM	171.222	0.207433	0.243397	0.243125	-1.41418	8160.69	326	2618.34	163		2013-04-08	65.1932	99.9684	0.955646	1	0.78758	1	0.170031	0.244233	0.629154	0.243299	0.246402	0.240197
0206792107			033Y	2012-10-22	66.6904	100.114	0.947834	0.999329	0.78227	0.999329	0.179465	0.246544	0.679096	0.227968	0.233759	0.222178	0.242144	0.243023	0.775655	0.787378	1000	28	557	60	57.7813	SIEMENS NM	172.421	0.452576	0.248065	0.271066	-1.30539	5473.8	328	1823.3	163		2013-10-04	60.2449	99.9886	0.927877	0.98984	0.847713	0.98984	0.0909624	0.246544	0.580181	0.221056	0.249163	0.192949
1312602406			052Y	2013-05-22	64.8302	100.033	0.914086	0.99901	0.814562	0.99901	0.238874	0.25761	0.612072	0.243704	0.268574	0.218834	0.241266	0.244961	0.764703	0.816705	714	0	845	84	44.3438	SIEMENS NM	164.42	0.303388	0.257754	0.24195	-1.41902	7392	324	2599.75	161		2014-03-03	62.5438	99.8782	0.896119	0.99663	0.771093	0.99663	0.136019	0.25761	0.575398	0.27036	0.217921	0.3228
3101422000			070Y	2012-09-17	64.7534	99.8939	0.841902	0.997471	0.775472	0.997471	0.167374	0.247837	0.624556	0.2486	0.166499	0.330701	0.247387	0.234255	0.864837	0.694462	1052	10	833	57	65.0938	SIEMENS NM	161.306	0.179447	0.245776	0.211535	-1.55336	10913.4	321	3846.6	159		2013-07-02	64.7111	99.8682	0.847747	0.999661	0.739807	0.999661	0.210488	0.247837	0.696568	0.223599	0.192247	0.254951
2202632026			049Y	2013-02-06	63.8615	99.799	0.892506	0.9985	0.825241	0.9985	0.206038	0.250624	0.766118	0.255254	0.150117	0.360391	0.249	0.233495	0.914315	0.6881	779	24	866	77	48.5625	SIEMENS NM	160.796	0.21305	0.256737	0.257412	-1.35708	9837.75	329	3555.22	161		2013-12-23	63.6145	99.8235	0.875172	0.999823	0.761128	0.999823	0.20508	0.250624	0.670058	0.222855	0.185122	0.260589
2709602148			052Y	2013-07-23	65.7017	100.003	0.885742	0.999971	0.760213	0.999971	0.259725	0.236533	0.500486	0.240645	0.216504	0.264787	0.238961	0.234108	0.738744	0.693219	857	4	564	70	54.1562	SIEMENS NM	169.971	0.252065	0.2353	0.203041	-1.59435	8701.66	318	2984.52	161		2014-04-28	62.0009	99.9818	0.903052	0.994954	0.820657	0.994954	0.271553	0.236533	0.518877	0.250225	0.248084	0.252367
0707642108			048Y	2013-05-17	89.3101	100.583	0.971099	0.999756	0.909353	0.999756	0.248504	0.274999	0.637385	0.26612	0.291309	0.24093	0.2395	0.243729	0.744504	0.797428	1016	9	479	59	67.7812	SIEMENS NM	167.666	0.588082	0.274054	0.225689	-1.4886	3227.33	326	345	165		2014-03-18	71.0753	100.259	0.958258	0.999163	0.899077	0.999163	0.203446	0.274999	0.651788	0.235372	0.212482	0.258261
[truncated: 23 more columns]

## Sheet: Mean
patient ID				Parameters
				pre-therapy																																	post-therapy
	BMI	chemocare record	age	date	LVEF%	LVEFPhase	Synchrony	SynchronyMaxMin	Entropy	EntropyMaxMin	App_Entropy	App_EntropyMaxMin	LHR	Average FS	LA FS	SA FS	Circulatory diastole	Circulatory Systole	Elongation Diastole	Elongation systole	(mean RR duration)	rejected beats	Accepted beats	Heart rate	frame time	Manufacturer	Phase	BoundApEn	BoundApEnMaxMin	ε	Log(ε)	Max Count	Max Pixel Num	Min Count	Min Pixel Num	kinetics	date	LVEF%	LVEF_Phase%	Synchrony	SynchronyMaxMin	Entropy	EntropyMaxMin	App_Entropy	App_EntropyMaxMin	LHR	Average FS	LA FS	SA FS
0312542186			060Y	2015-04-13	85.5809	99.8985	0.936843	0.989479	0.639814	0.989479	0.140619	0.231498	0.533944	0.229774	0.255241	0.204307	0.240082	0.244053	0.750914	0.802269	645	0	1319	93	39.9375	SIEMENS NM	167.644	0.146377	0.230817	0.287312	-1.24718	2473.97	257	356.724	113		2015-08-17	58.2414	99.7904	0.934163	0.990071	0.632873	0.990071	0.165183	0.231498	0.477929	0.22779	0.249073	0.206506
3008822223			032Y	2014-10-21	67.1727	99.8799	0.878564	0.980758	0.46512	0.980758	0.129112	0.224567	0.708638	0.276396	0.24847	0.304321	0.24807	0.244991	0.882798	0.817192	1153	107	492	52	73.9375	SIEMENS NM	168.196	0.160857	0.223844	0.273527	-1.29635	7223.29	270	2371.22	113		2015-01-15	68.818	99.8592	0.930472	0.986103	0.585189	0.986103	0.144727	0.224567	0.783363	0.221861	0.220569	0.223153
0107652005			049Y	2014-08-04	72.0953	99.8533	0.947428	0.991746	0.757142	0.991746	0.159647	0.256915	0.84444	0.234407	0.233874	0.234939	0.244295	0.244223	0.80598	0.804859	722	27	805	83	42.8125	SIEMENS NM	165.222	0.450391	0.254314	0.30688	-1.1813	4331.53	262	1208.7	117		2015-01-19	60.7793	99.8927	0.89664	0.99991	0.653495	0.99991	0.120011	0.256915	0.728147	0.240727	0.274694	0.206759
1506830862			031Y	2014-12-15	74.3308	99.8395	0.942946	0.989479	0.723405	0.989479	0.107064	0.230842	0.718802	0.245151	0.242081	0.248221	0.245201	0.244805	0.820766	0.814118	759	36	865	79	46.9375	SIEMENS NM	150.262	0.267716	0.230311	0.345122	-1.06386	4781.87	257	1227.47	113		2014-12-15	74.3308	99.8395	0.942946	0.989479	0.723405	0.989479	0.107064	0.230842	0.74294	0.245151	0.242081	0.248221
1509631046			049Y	2012-10-23	67.1542	99.9623	0.90437	0.995396	0.692116	0.995396	0.095593	0.237051	0.80883	0.241443	0.242746	0.24014	0.244926	0.245093	0.816115	0.818923	1111	74	985	54	69.4375	SIEMENS NM	152.172	0.310974	0.231186	0.340899	-1.07617	7771.21	263	2552.52	121		2015-07-24	65.4419	99.8186	0.814615	0.999903	0.508745	0.999903	0.116376	0.237051	0.607962	0.268491	0.256896	0.280086
0801792207			036Y	2015-10-02	67.2076	99.8549	0.949591	0.995792	0.644099	0.995792	0.0600747	0.243233	0.651859	0.235062	0.24425	0.225873	0.240719	0.242221	0.758209	0.776647	1052	111	534	57	67.375	SIEMENS NM	144.671	0.47449	0.242441	0.344039	-1.067	3978.87	262	1304.77	121		2015-11-09	67.9047	99.8443	0.947145	0.988359	0.611989	0.988359	0.0794952	0.243233	0.617297	0.220815	0.206131	0.2355
2111652148			047Y	2013-01-22	68.5943	99.7915	0.893885	0.987818	0.694515	0.987818	0.15517	0.245838	0.665319	0.240139	0.233444	0.246835	0.245881	0.245063	0.832954	0.818403	833	2	717	72	51.8125	SIEMENS NM	152.503	0.190294	0.244633	0.229556	-1.47161	7275.29	262	2284.86	114		2013-10-21	63.3656	99.8391	0.897869	0.99187	0.626084	0.99187	0.14414	0.245838	0.684396	0.234647	0.251404	0.217891
1302522183			061Y	2013-05-09	72.0689	99.7852	0.932472	0.990522	0.612878	0.990522	0.105899	0.236542	0.884433	0.221975	0.232388	0.211562	0.242001	0.24355	0.77383	0.794825	895	33	1056	67	57.2812	SIEMENS NM	151.724	0.129038	0.23823	0.258831	-1.35158	4812.61	262	1344.22	116		2014-08-18	74.1394	99.7805	0.924092	0.996744	0.581723	0.996744	0.128458	0.236542	1.07181	0.244768	0.218223	0.271312
1909472174			066Y	2014-08-20	76.1924	99.9139	0.909012	0.988182	0.674256	0.988182	0.056661	0.223211	0.543623	0.240825	0.260034	0.221616	0.242676	0.245347	0.782651	0.823285	740	0	552	81	45.125	SIEMENS NM	141.33	0.460095	0.222394	0.355921	-1.03305	6048.48	266	1440	116		2014-11-24	81.746	99.8401	0.921849	0.981489	0.738752	0.981489	0.13253	0.223211	0.615972	0.25036	0.221049	0.279671
2401402012			075Y	2015-05-26	64.4976	99.8012	0.911077	0.992774	0.698519	0.992774	0.173549	0.229804	0.534013	0.236129	0.245351	0.226908	0.240622	0.242138	0.757072	0.775575	689	44	855	87	42.75	SIEMENS NM	165.697	0.322231	0.222913	0.305926	-1.18441	7987.83	260	2835.88	117		2015-08-06	68.9505	99.7743	0.917332	0.990665	0.5478	0.990665	0.200119	0.229804	0.588124	0.231458	0.256171	0.206745
0603552064			061Y	2016-06-27	66.5031	99.7439	0.941951	0.992267	0.676279	0.992267	0.116183	0.225706	0.911014	0.248334	0.256474	0.240193	0.244723	0.245753	0.812774	0.830571	1016	19	638	59	62.875	SIEMENS NM	152.34	0.149485	0.224926	0.23376	-1.45346	5726	261	1918.03	117		2016-11-28	67.3206	99.7538	0.950206	0.984319	0.685847	0.984319	0.167641	0.225706	0.917633	0.231298	0.205783	0.256814
2910525244			062Y	2015-08-10	70.7702	99.9315	0.936851	0.999921	0.770038	0.999921	0.132235	0.234415	0.67575	0.261927	0.2825	0.241355	0.241191	0.244398	0.763792	0.807592	882	0	604	68	56.125	SIEMENS NM	154.66	0.221171	0.234147	0.31691	-1.14914	8813.5	285	2576.17	145		2017-02-01	75.9762	99.9854	0.877675	0.991449	0.597798	0.991449	0.112799	0.234415	0.647937	0.240979	0.210882	0.271075
0805745688			041Y	2015-05-15	63.8218	99.8337	0.972908	0.987934	0.837039	0.987934	0.146341	0.245863	0.60916	0.236479	0.230705	0.242254	0.243103	0.242221	0.788484	0.776647	769	8	535	78	47.3125	SIEMENS NM	158.551	0.372925	0.245129	0.30015	-1.20347	5030.1	271	1819.8	118		2016-04-11	66.191	99.8621	0.900511	0.992992	0.605059	0.992992	0.134216	0.245863	0.653417	0.222959	0.188116	0.257803
0709592086			055Y	2014-11-10	69.9353	99.8712	0.945218	0.992384	0.653746	0.992384	0.137889	0.246582	0.601637	0.25924	0.235732	0.282747	0.247206	0.244398	0.860529	0.807592	952	30	571	63	59.75	SIEMENS NM	164.815	0.17266	0.245962	0.283971	-1.25888	5478.94	263	1647.23	118		2016-06-08	66.8637	99.9182	0.930571	0.995396	0.565518	0.995396	0.0892172	0.246582	0.530139	0.229563	0.261653	0.197472
2712910923			026Y	2018-08-15	73.7069	99.8595	0.903114	0.990805	0.650987	0.990805	0.0838144	0.225883	0.606083	0.264448	0.283965	0.244932	0.242459	0.245288	0.779758	0.822265	833	17	632	72	51.75	SIEMENS NM	154.297	0.279629	0.225179	0.316472	-1.15052	5490.35	266	1443.58	118		2019-01-09	67.7556	99.8015	0.868693	0.988785	0.604591	0.988785	0.114526	0.225883	0.587493	0.279076	0.230175	0.327977
2106750625			037Y	2013-03-22	72.563	99.9236	0.989793	0.991746	0.926264	0.991746	0.174288	0.223031	0.608296	0.271503	0.229587	0.313418	0.24895	0.244738	0.912283	0.813014	779	67	908	77	49.6875	SIEMENS NM	162.003	0.30522	0.217358	0.245259	-1.40544	4367.47	262	1198.3	117		2014-03-07	58.2394	99.8982	0.987273	0.938003	0.832584	0.938003	0.159041	0.223031	0.699806	0.224637	0.210436	0.238838
1810672082			045Y	2012-11-12	71.4977	100.082	0.935866	0.99187	0.676002	0.99187	0.120879	0.249407	0.798891	0.237184	0.216237	0.258132	0.245164	0.242192	0.820117	0.77628	833	51	613	72	47.2188	SIEMENS NM	159.827	0.373773	0.248797	0.314841	-1.15569	5278.4	264	1504.47	118		2013-06-27	68.0067	99.9262	0.928911	0.994829	0.600623	0.994829	0.111924	0.249407	0.789964	0.253566	0.254197	0.252936
1810792169			037Y	2017-06-29	66.215	99.7666	0.952474	0.991487	0.754011	0.991487	0.203863	0.223476	0.80844	0.219137	0.207771	0.230502	0.243564	0.241874	0.795019	0.772208	759	1	968	79	46.8125	SIEMENS NM	167.534	0.194932	0.222846	0.235802	-1.44476	4906.85	258	1657.78	115		2018-03-08	65.2457	99.7668	0.941352	0.989117	0.624514	0.989117	0.188918	0.223476	0.818867	0.232441	0.247317	0.217564
0808582232			057Y	2016-06-02	55.2356	99.8115	0.983273	0.946771	0.772317	0.946771	0.0932493	0.228543	0.453682	0.228572	0.232484	0.22466	0.241918	0.242526	0.772767	0.780644	659	89	662	91	40.9688	SIEMENS NM	150.018	0.0891152	0.228308	0.228423	-1.47656	9632.6	263	4311.98	116		2017-04-18	55.4558	99.7538	0.963915	0.985228	0.696739	0.985228	0.199901	0.228543	0.485418	0.231683	0.264112	0.199255
1909612022			056Y	2017-11-30	66.2459	99.7444	0.865396	0.994476	0.559588	0.994476	0.152705	0.230983	0.765873	0.240615	0.236182	0.245048	0.245881	0.245347	0.832954	0.823285	1111	80	854	54	69.1875	SIEMENS NM	161.174	0.185898	0.230421	0.255234	-1.36557	7739.54	263	2612.41	120		2018-07-02	65.5614	99.7669	0.889632	0.993163	0.530352	0.993163	0.116054	0.230983	0.734106	0.237412	0.255387	0.219438
2608472060			070Y	2018-07-03	64.8117	99.7634	0.898252	0.99689	0.491183	0.99689	0.212871	0.225279	0.559344	0.231348	0.253363	0.209333	0.241594	0.244801	0.768714	0.814045	1000	35	818	60	62.5625	SIEMENS NM	170.071	0.206462	0.224918	0.226554	-1.48477	7227.8	259	2543.34	121		2019-04-01	64.3367	99.7281	0.894597	0.989535	0.452473	0.989535	0.22048	0.225279	0.732192	0.232212	0.24577	0.218655
0711782164			037Y	2016-10-14	75.5233	99.9865	0.933624	0.992992	0.683078	0.992992	0.142654	0.241861	0.710506	0.235479	0.251138	0.21982	0.24258	0.244801	0.781368	0.814045	740	67	767	81	42.5	SIEMENS NM	161.279	0.170738	0.241641	0.28097	-1.26951	3965	264	970.5	119		2017-01-16	72.3373	99.8611	0.949735	0.992499	0.772312	0.992499	0.0951192	0.241861	0.682511	0.237661	0.17811	0.297212
2807542042			061Y	2016-06-29	61.757	99.7698	0.956186	0.987818	0.722739	0.987818	0.206381	0.230842	0.517511	0.232499	0.224623	0.240376	0.242677	0.241436	0.782668	0.766767	652	7	1239	92	40.5625	SIEMENS NM	166.872	0.205016	0.230149	0.226478	-1.48511	7225.47	262	2763.24	114		2017-01-24	54.8558	99.7736	0.991339	0.956208	0.860715	0.956208	0.135161	0.230842	0.45714	0.240676	0.247038	0.234314
0705792129			036Y	2015-09-10	68.5293	99.9869	0.921399	0.997652	0.683163	0.997652	0.065815	0.242576	0.864731	0.255559	0.256789	0.254329	0.244919	0.24508	0.816001	0.818701	952	21	607	63	58.125	SIEMENS NM	146.208	0.127746	0.24177	0.262589	-1.33717	5154	263	1622	124		2016-05-19	64.1499	99.7571	0.882383	0.990399	0.5049	0.990399	0.12381	0.242576	0.944601	0.223723	0.216789	0.230658
3009612133			055Y	2017-01-27	75.7802	99.8494	0.969223	0.987187	0.80248	0.987187	0.114026	0.239207	0.529154	0.23776	0.276313	0.199207	0.23906	0.245075	0.739791	0.818613	705	7	743	85	43.6875	SIEMENS NM	164.392	0.350719	0.238461	0.320518	-1.13782	3673.03	263	889.6	114		2017-06-06	77.4475	99.8663	0.94578	0.990106	0.75006	0.990106	0.108286	0.239207	0.459277	0.233716	0.265821	0.201611
1908592109			057Y	2017-01-27	65.8259	99.817	0.969	0.988531	0.80141	0.988531	0.152012	0.221982	0.847447	0.248859	0.22878	0.268938	0.246423	0.243875	0.843512	0.79959	750	23	728	80	46.9375	SIEMENS NM	167.756	0.276605	0.221147	0.300528	-1.20222	4932	270	1685.47	118		2017-05-25	62.3684	99.8704	0.972973	0.976287	0.739178	0.976287	0.144624	0.221982	0.685299	0.234759	0.276353	0.193165
1308512023			064Y	2016-07-18	63.0926	99.8459	0.882411	0.991344	0.589898	0.991344	0.120993	0.24715	0.621341	0.240231	0.230374	0.250088	0.243601	0.242107	0.795556	0.775178	810	0	752	74	50.2812	SIEMENS NM	147.893	0.164693	0.246351	0.240466	-1.42518	8844.89	265	3264.42	118		2017-04-04	62.328	99.7974	0.917967	0.991746	0.601771	0.991746	0.118631	0.24715	0.597157	0.231882	0.239206	0.224559
0404502067			066Y	2016-06-01	64.1202	99.81	0.937697	0.985892	0.776215	0.985892	0.214091	0.245887	0.583813	0.223898	0.227439	0.220357	0.241613	0.242171	0.768952	0.776001	789	2	867	76	49.625	SIEMENS NM	175.016	0.205623	0.2452	0.23592	-1.44426	8189.27	265	2938.29	114		2017-02-20	64.821	99.7841	0.944095	0.99187	0.754345	0.99187	0.135617	0.245887	0.560315	0.232151	0.222472	0.24183
1406432334			073Y	2017-02-21	70.0316	99.7605	0.90176	0.984554	0.552559	0.984554	0.183169	0.222659	0.629094	0.235359	0.249887	0.22083	0.242257	0.244374	0.777113	0.807216	923	5	754	65	57.3125	SIEMENS NM	165.612	0.179091	0.222228	0.242517	-1.41668	5284.9	267	1583.8	114		2017-08-23	66.9488	99.682	0.88858	0.982474	0.574781	0.982474	0.182222	0.222659	0.629369	0.237489	0.247537	0.227442
1603472282			065Y	2012-10-24	66.4143	99.8674	0.974886	0.987187	0.934382	0.987187	0.159934	0.226409	0.495392	0.233061	0.260734	0.205388	0.241007	0.245075	0.761594	0.818613	1016	0	323	59	62.625	SIEMENS NM	148.266	0.24041	0.225597	0.227768	-1.47943	5779.62	263	1941.13	114		2013-03-15	65.03	99.8991	0.843276	0.985003	0.371841	0.985003	0.127037	0.226409	0.49978	0.238494	0.27615	0.200839
2610542364			061Y	2015-12-14	69.3482	99.7534	0.919759	0.991746	0.66947	0.991746	0.147827	0.247162	1.00817	0.241665	0.236736	0.246594	0.244762	0.244095	0.813412	0.802907	895	1	783	67	55.2188	SIEMENS NM	158.181	0.173042	0.246408	0.255465	-1.36467	6127.53	262	1878.2	117		2016-08-15	69.337	99.7788	0.909145	0.992885	0.630402	0.992885	0.0910311	0.247162	0.98691	0.250037	0.232444	0.26763
1705552188			060Y	2016-01-27	62.3076	99.6977	0.971214	0.985003	0.819552	0.985003	0.1595	0.241344	0.536955	0.237849	0.255843	0.219855	0.237989	0.24121	0.728782	0.764026	821	10	884	73	50.25	SIEMENS NM	165.497	0.16729	0.240483	0.20182	-1.60038	7626.66	264	2874.67	113		2016-10-17	62.0056	99.8212	0.885457	0.99054	0.598941	0.99054	0.129988	0.241344	0.676019	0.257139	0.260431	0.253847
2601712147			044Y	2015-12-17	68.8934	99.9328	0.868433	0.988359	0.485448	0.988359	0.144567	0.225236	0.637858	0.224686	0.242576	0.206796	0.239872	0.242772	0.748576	0.783938	1176	34	452	51	73.3125	SIEMENS NM	158.402	0.177746	0.22472	0.228377	-1.47676	8158.74	268	2537.91	117		2016-09-09	66.7763	99.9178	0.823662	0.988182	0.427773	0.988182	0.0948549	0.225236	0.569612	0.253435	0.236685	0.270185
1511788089			038Y	2017-02-27	77.3967	100.053	0.935408	0.996839	0.745209	0.996839	0.0979835	0.241532	0.68074	0.383764	0.388343	0.379184	0.237152	0.238246	0.720576	0.731365	923	71	517	65	57.3125	SIEMENS NM	153.105	0.295832	0.240568	0.266789	-1.3213	5191.87	272	1173.53	127		2017-09-21	75.2914	100.114	0.927148	0.985815	0.6205	0.985815	0.115157	0.241532	0.593069	0.23929	0.210612	0.267967
1211962164			019Y	2016-10-18	66.7523	99.8786	0.889955	0.990937	0.567953	0.990937	0.189422	0.245161	0.631438	0.224925	0.229407	0.220444	0.240715	0.241453	0.758155	0.766973	759	96	860	79	47.0938	SIEMENS NM	175.275	0.190541	0.244362	0.237052	-1.43948	6437.74	259	2140.4	115		2017-02-06	64.8842	99.853	0.929752	0.991344	0.546749	0.991344	0.198819	0.245161	0.642965	0.234626	0.246738	0.222514
2009735943			043Y	2016-10-05	64.636	100.255	0.918878	0.992992	0.640873	0.992992	0.173199	0.245116	0.605971	0.236646	0.260988	0.212305	0.241921	0.245372	0.772807	0.823717	833	2	774	72	52.8438	SIEMENS NM	163.16	0.213503	0.244267	0.250549	-1.3841	6635.94	264	2346.74	119		2017-02-27	63.3956	99.8278	0.932797	0.990106	0.654993	0.990106	0.104108	0.245116	0.537986	0.232559	0.262042	0.203075
1110602081			056Y	2017-02-28	68.5226	99.7194	0.861334	0.989955	0.611656	0.989955	0.170675	0.224987	0.727337	0.226498	0.246595	0.206401	0.24056	0.24368	0.756355	0.796705	631	4	1433	95	39.375	SIEMENS NM	163.303	0.279545	0.224183	0.302383	-1.19606	7698.96	263	2423.43	116		2017-11-21	60.6746	99.7298	0.91927	0.985228	0.637462	0.985228	0.160286	0.224987	0.524115	0.230665	0.241355	0.219976
1104702460			046Y	2017-03-02	69.1412	99.8748	0.914401	0.998916	0.6027	0.998916	0.0916083	0.226351	0.753435	0.240459	0.25329	0.227629	0.242935	0.244747	0.786159	0.813176	1000	106	483	60	63.125	SIEMENS NM	159.214	0.432075	0.225008	0.358115	-1.0269	5551.21	258	1713.04	124		2017-10-02	67.0515	99.8022	0.86841	0.991746	0.62228	0.991746	0.173532	0.226351	0.702603	0.239208	0.229956	0.24846
1701622424			054Y	2016-10-27	70.2038	99.8377	0.959399	0.974744	0.777527	0.974744	0.171977	0.242481	0.518129	0.229757	0.234603	0.22491	0.240151	0.240975	0.751693	0.761213	759	19	626	79	48.0938	SIEMENS NM	161.798	0.176111	0.241777	0.204947	-1.585	5592.08	268	1666.23	115		2017-03-02	72.9738	99.7673	0.937621	0.987754	0.702988	0.987754	0.0751424	0.242481	0.555519	0.230282	0.248607	0.211957
2406552209			061Y	2016-08-02	63.6862	99.795	0.954609	0.988258	0.68623	0.988258	0.202347	0.227701	0.630838	0.219481	0.209349	0.229613	0.243557	0.242057	0.794919	0.774546	857	0	698	70	53.7188	SIEMENS NM	169.052	0.205271	0.227047	0.231934	-1.4613	6474.03	259	2350.97	113		2017-06-05	67.7605	99.7934	0.927346	0.989212	0.58991	0.989212	0.178509	0.227701	0.618623	0.239336	0.252825	0.225848
1701522152			063Y	2015-07-29	78.441	99.7569	0.823622	0.985892	0.569978	0.985892	0.0931993	0.250547	0.645751	0.228943	0.255724	0.202162	0.239218	0.24355	0.741465	0.794825	895	2	530	67	54.7188	SIEMENS NM	151.673	0.171937	0.250024	0.269975	-1.30943	6071	265	1308.85	114		2016-05-30	71.11	99.8231	0.862424	0.994215	0.501914	0.994215	0.118586	0.250547	0.851152	0.240762	0.263917	0.217608
0105582239			056Y	2014-10-03	67.6667	99.7766	0.902047	0.984554	0.581261	0.984554	0.151079	0.245872	0.742162	0.220522	0.195922	0.245122	0.24336	0.239419	0.792092	0.743625	937	0	650	64	58.25	SIEMENS NM	154.885	0.252762	0.245356	0.341252	-1.07514	6616.7	267	2139.4	114		2015-02-25	64.7281	99.7733	0.903225	0.992384	0.618596	0.992384	0.155383	0.245872	0.560301	0.225418	0.252286	0.19855
0110622480			051Y	2013-12-10	70.2242	99.7744	0.908262	0.985228	0.550024	0.985228	0.193956	0.226972	0.700463	0.235134	0.244478	0.22579	0.241295	0.242774	0.765051	0.783974	845	37	860	71	51.6563	SIEMENS NM	161.152	0.194761	0.226304	0.241501	-1.42088	5755.21	266	1713.66	114		2014-09-01	64.1395	99.8142	0.888141	0.985676	0.566873	0.985676	0.100707	0.226972	0.613244	0.238935	0.240016	0.237855
0707642108			048Y	2013-05-17	88.5459	100.042	0.973007	0.99506	0.745143	0.99506	0.183095	0.246492	0.637385	0.243949	0.209892	0.278007	0.247197	0.242934	0.860318	0.78615	1016	9	479	59	67.7812	SIEMENS NM	166.932	0.418961	0.245723	0.276303	-1.28626	2840.33	266	325.333	122		2014-03-18	63.6466	100.402	0.95952	0.991212	0.774015	0.991212	0.154533	0.246492	0.651788	0.24071	0.261942	0.219478
0301582203			057Y	2015-01-06	71.1521	99.8145	0.900031	0.994559	0.720459	0.994559	0.164143	0.230189	0.588942	0.244004	0.235048	0.25296	0.245816	0.244691	0.831737	0.812261	555	14	1415	108	34.5	SIEMENS NM	167.478	0.376029	0.229484	0.310873	-1.16837	7515.88	265	2168.18	121		2015-09-21	66.9091	99.8258	0.879709	0.988874	0.569624	0.988874	0.130917	0.230189	0.56751	0.237377	0.182302	0.292453
2501972112			017Y	2015-01-08	73.2202	99.8233	0.817697	0.989691	0.545296	0.989691	0.146378	0.223831	0.493202	0.236404	0.236029	0.236778	0.244129	0.244077	0.803417	0.80263	1276	71	341	47	80	SIEMENS NM	162.159	0.180456	0.223022	0.261402	-1.3417	6309.73	268	1689.73	118		2015-04-30	67.9408	99.8273	0.951831	0.98221	0.768536	0.98221	0.115826	0.223831	0.53866	0.2299	0.210091	0.249709
0606632026			051Y	2015-01-08	66.5547	99.7684	0.883338	0.982474	0.647453	0.982474	0.102992	0.22719	0.463259	0.253639	0.247215	0.260063	0.245564	0.244738	0.827132	0.813014	821	8	1159	73	50.9375	SIEMENS NM	152.854	0.141913	0.226622	0.273972	-1.29473	11387.9	270	3808.71	114		2015-07-14	65.3029	99.7344	0.839204	0.992384	0.512739	0.992384	0.18301	0.22719	0.479634	0.228338	0.223565	0.23311
0804532044			061Y	2014-12-08	61.3132	99.8206	0.920365	0.990665	0.723437	0.990665	0.0498145	0.259397	0.6004	0.266538	0.276256	0.25682	0.244103	0.245421	0.803027	0.824592	983	10	714	61	61.75	SIEMENS NM	145.892	0.378368	0.258964	0.381088	-0.964724	7451.6	264	2882.79	117		2015-11-09	69.165	99.791	0.959758	0.992828	0.720465	0.992828	0.0551573	0.259397	0.7012	0.248003	0.228521	0.267485
1210692120			043Y	2013-07-05	67.9793	99.9538	0.938932	0.994908	0.70342	0.994908	0.155585	0.226441	0.669017	0.233511	0.235378	0.231645	0.244058	0.244313	0.802336	0.806253	1034	155	494	58	63.7813	SIEMENS NM	160.664	0.393859	0.22575	0.333835	-1.09711	4906.2	262	1571	120		2014-02-24	60.1529	99.8838	0.936302	0.986545	0.683509	0.986545	0.0813943	0.226441	0.890779	0.261075	0.28076	0.24139
0505602326			053Y	2013-08-19	65.033	99.823	0.926303	0.982547	0.672696	0.982547	0.140762	0.246597	0.669086	0.273041	0.212364	0.333718	0.248936	0.241797	0.911715	0.771244	869	24	695	69	54.0625	SIEMENS NM	156.159	0.17352	0.246511	0.248458	-1.39248	6341.4	277	2217.4	117		2014-05-08	61.4809	99.8112	0.897275	0.996232	0.583118	0.996232	0.0786658	0.246597	0.647199	0.249026	0.220194	0.277857
1008692182			045Y	2015-03-23	65.3381	99.7596	0.969156	0.989212	0.643251	0.989212	0.206503	0.245825	0.718899	0.236073	0.252847	0.219298	0.241731	0.244232	0.770416	0.80501	800	393	1623	75	47.0312	SIEMENS NM	182.02	0.204245	0.24521	0.251866	-1.37886	4372.85	262	1515.71	115		2016-01-14	63.687	99.7668	0.951387	0.99187	0.747356	0.99187	0.199505	0.245825	0.734541	0.216923	0.202325	0.231521
3110652005			053Y	2019-04-01	65.4093	100.053	0.872247	0.996694	0.574941	0.996694	0.163467	0.224677	0.564319	0.24661	0.249905	0.243315	0.241688	0.242221	0.769884	0.776647	937	3	621	64	58.5	SIEMENS NM	168.144	0.393978	0.222988	0.344896	-1.06451	10011.2	266	3462.94	124		2019-10-28	65.3056	99.969	0.827916	0.993781	0.49672	0.993781	0.0827081	0.224677	0.614055	0.241201	0.304296	0.178106
0404482201			065Y	2014-03-17	75.9285	99.8429	0.939596	0.993939	0.705044	0.993939	0.124431	0.228354	0.68734	0.236371	0.238705	0.234038	0.244336	0.244648	0.806619	0.811563	697	2	574	86	41.5312	SIEMENS NM	159.29	0.192641	0.228186	0.231606	-1.46272	5174.9	262	1245.68	119		2014-10-29	75.4879	99.8837	0.926354	0.987187	0.619845	0.987187	0.105764	0.228354	0.657335	0.229843	0.225121	0.234565
1903552087			059Y	2014-12-01	65.2581	99.7792	0.96078	0.985003	0.796408	0.985003	0.135911	0.227847	0.63685	0.229287	0.249071	0.209503	0.241255	0.244223	0.764572	0.804859	681	5	914	88	42.4688	SIEMENS NM	165.597	0.207808	0.227254	0.249955	-1.38647	6906.06	264	2399.29	113		2014-05-13	68.0433	99.7658	0.964439	0.992147	0.768568	0.992147	0.146335	0.227847	0.566564	0.228251	0.266346	0.190157
0608770604			037Y	2014-09-09	69.6889	100.205	0.914955	0.993939	0.527801	0.993939	0.144512	0.24096	0.533811	0.216268	0.194604	0.237932	0.241608	0.237863	0.768889	0.727526	909	4	507	66	56.7188	SIEMENS NM	160.926	0.329215	0.240337	0.282573	-1.26382	5764.67	262	1747.33	119		2015-04-07	75.8299	99.9375	0.944022	0.986511	0.608835	0.986511	0.114264	0.24096	0.577779	0.233458	0.250366	0.21655
3011552207			059Y	2015-11-02	81.9541	99.9503	0.950539	0.988531	0.718507	0.988531	0.100001	0.241885	0.608231	0.236794	0.236116	0.237472	0.244295	0.244202	0.80598	0.804549	1034	9	461	58	65.9062	SIEMENS NM	149.287	0.386884	0.241116	0.340428	-1.07755	3434.72	270	619.828	118		2015-11-02	81.9541	99.9503	0.950539	0.988531	0.718507	0.988531	0.100001	0.241885	0.651821	0.236794	0.236116	0.237472
0108672468			047Y	2015-01-14	95.0497	99.8103	0.921812	0.0950172	0.605272	0.0950172	0.165127	0.243135	0.608231	0.227387	0.217087	0.237687	0.243404	0.241846	0.792724	0.771866	800	33	601	75	50.2812	SIEMENS NM	165.422	0.177721	0.242346	0.276973	-1.28384	2194.93	82	108.655	4		2015-08-18	61.3417	99.7631	0.939746	0.988359	0.720741	0.988359	0.125669	0.243135	0.587578	0.226753	0.249802	0.203703
1305622162			052Y	2014-12-19	74.9722	99.8068	0.918377	0.992677	0.737317	0.992677	0.0793354	0.237279	0.57819	0.241831	0.198779	0.284883	0.247066	0.241305	0.857309	0.765178	779	7	936	77	47.375	SIEMENS NM	149.979	0.25947	0.232577	0.31494	-1.15537	7916.8	298	1981.4	134		2015-08-18	67.5806	99.801	0.870468	0.99506	0.625401	0.99506	0.183142	0.237279	0.60792	0.256291	0.255384	0.257197
0712522107			062Y	2015-04-23	67.8108	99.7949	0.937121	0.988002	0.732211	0.988002	0.193517	0.245161	0.525589	0.250073	0.23739	0.262756	0.246809	0.245347	0.851612	0.823285	750	1	606	80	47.2812	SIEMENS NM	164.094	0.204791	0.244362	0.201414	-1.60239	5966.8	264	1920.67	115		2015-11-10	65.5093	99.813	0.95692	0.991344	0.746872	0.991344	0.185307	0.245161	0.464889	0.227769	0.268734	0.186803
1207522023			065Y	2018-02-22	68.0295	99.857	0.845566	0.988182	0.572687	0.988182	0.131871	0.247893	0.539218	0.236318	0.253575	0.21906	0.241472	0.24408	0.767206	0.802681	789	16	842	76	48.9375	SIEMENS NM	149.54	0.128736	0.248539	0.259178	-1.35024	10990.3	266	3513.65	116		2018-10-09	62.7789	99.8098	0.873758	0.995396	0.485763	0.995396	0.138247	0.247893	0.51113	0.234107	0.23753	0.230684
0309702305			047Y	2017-11-13	71.3445	99.7843	0.926502	0.984319	0.585562	0.984319	0.144421	0.243959	0.818258	0.235414	0.257387	0.213441	0.241601	0.244816	0.768795	0.81429	705	2	1783	85	43.875	SIEMENS NM	160.323	0.232692	0.242202	0.328168	-1.11423	4773.83	265	1367.97	113		2018-07-16	63.5002	99.7139	0.909682	0.988953	0.592747	0.988953	0.156763	0.243959	0.814985	0.28033	0.269604	0.291055
0201622246			055Y	2017-09-18	70.9744	99.7482	0.870018	0.992992	0.594977	0.992992	0.15763	0.243187	0.76548	0.231763	0.217447	0.24608	0.243368	0.241144	0.792215	0.763228	1071	24	779	56	66.875	SIEMENS NM	165.437	0.348905	0.242441	0.291708	-1.232	5740.8	264	1666.3	119		2018-05-31	68.6766	99.7793	0.86741	0.989691	0.461211	0.989691	0.168463	0.243187	0.687614	0.221257	0.223907	0.218607
1702585506			060Y	2018-02-28	66.1929	99.8024	0.928819	0.995396	0.682562	0.995396	0.155179	0.229019	0.705897	0.245041	0.214267	0.275815	0.247161	0.243364	0.859481	0.792156	740	2	939	81	46.1875	SIEMENS NM	161.994	0.345437	0.228414	0.312229	-1.16402	7688.87	263	2599.39	121		2018-12-17	66.3691	99.8804	0.852348	0.991618	0.533491	0.991618	0.133065	0.229019	0.464725	0.231325	0.241602	0.221049
1911712063			046Y	2018-06-05	66.5557	99.8941	0.921161	0.990796	0.651133	0.990796	0.177014	0.233249	0.583378	0.229927	0.206152	0.253701	0.245037	0.241616	0.817976	0.768982	1000	2	531	60	61.6875	SIEMENS NM	165.756	0.343164	0.229692	0.314482	-1.15683	6807.73	257	2276.8	114		2019-01-08	68.204	99.9043	0.88227	0.990281	0.644414	0.990281	0.167211	0.233249	0.562772	0.241852	0.270428	0.213275
0506742121			042Y	2017-02-17	65.0757	99.8195	0.920257	0.984554	0.62458	0.984554	0.182926	0.222595	0.590609	0.248441	0.23887	0.258012	0.241055	0.239361	0.762165	0.742996	789	0	859	76	49.1875	SIEMENS NM	173.14	0.20128	0.221769	0.240225	-1.42618	4774.07	267	1667.31	114		2017-08-17	63.1102	99.7724	0.963804	0.970951	0.627603	0.970951	0.172269	0.222595	0.648832	0.248875	0.246913	0.250836
1705935648			024Y	2018-03-05	70.8143	99.8864	0.97229	0.990942	0.737112	0.990942	0.108053	0.247804	0.727787	0.274604	0.234681	0.314527	0.248718	0.244502	0.903493	0.809232	882	250	649	68	55.9375	SIEMENS NM	154.964	0.282107	0.24693	0.319555	-1.14083	4006.87	268	1169.43	119		2018-04-30	65.5312	99.8657	0.967149	0.992267	0.746176	0.992267	0.124319	0.247804	0.838513	0.227347	0.24089	0.213803
0806692103			048Y	2017-12-05	62.6439	99.8529	0.963109	0.995178	0.728953	0.995178	0.151048	0.22766	0.605323	0.23603	0.223366	0.248694	0.244655	0.242864	0.81167	0.785199	869	29	615	69	54.1875	SIEMENS NM	161.868	0.388577	0.226951	0.318369	-1.14454	5783.91	257	2160.64	118		2018-10-29	62.9671	99.8906	0.950321	0.986338	0.757307	0.986338	0.187464	0.22766	0.510524	0.236454	0.239118	0.23379
2804662160			051Y	2017-09-13	67.6775	99.7309	0.928334	0.991746	0.685121	0.991746	0.181092	0.251215	0.734527	0.239587	0.26017	0.219004	0.237852	0.241527	0.727412	0.767887	759	10	1713	79	46.9375	SIEMENS NM	165.439	0.380784	0.250509	0.299517	-1.20558	5442.47	262	1759.14	117		2018-03-06	60.7295	99.7627	0.968267	0.994666	0.768018	0.994666	0.224116	0.251215	0.650439	0.221735	0.206942	0.236528
1311612203			051Y	2012-11-22	69.2624	99.8615	0.953906	0.984319	0.760043	0.984319	0.170851	0.246558	0.792599	0.240388	0.248315	0.232461	0.243596	0.244691	0.795483	0.812261	545	13	814	110	33.375	SIEMENS NM	165.102	0.174538	0.245888	0.25293	-1.37464	7498.76	265	2304.94	113		2013-06-17	70.4933	99.8347	0.919698	0.994476	0.610686	0.994476	0.181064	0.246558	0.854256	0.231633	0.25389	0.209376
2503792189			038Y	2017-05-04	72.1306	99.8261	0.912519	0.994207	0.622407	0.994207	0.0627631	0.225504	0.592388	0.255451	0.225665	0.285236	0.245931	0.241676	0.83389	0.769738	1153	17	450	52	71.1875	SIEMENS NM	148.41	0.372808	0.224712	0.344076	-1.06689	4786.13	268	1333.87	122		2018-01-09	61.1934	99.8322	0.951223	0.974374	0.731142	0.974374	0.0900967	0.225504	0.598161	0.264435	0.233794	0.295077
2603690949			047Y	2016-10-19	67.9971	99.6952	0.832574	0.995396	0.558663	0.995396	0.138542	0.2462	0.714838	0.262059	0.258925	0.265194	0.243967	0.243507	0.800969	0.794194	967	4	646	62	59.8438	SIEMENS NM	158.562	0.160471	0.246287	0.252225	-1.37743	8218	263	2630	121		2017-07-11	66.2171	99.7215	0.842661	0.99187	0.568151	0.99187	0.136894	0.2462	0.758008	0.238372	0.183986	0.292758
2011642248			051Y	2016-04-01	63.7914	99.8959	0.941837	0.994666	0.764058	0.994666	0.193937	0.245189	0.573748	0.229571	0.196946	0.262196	0.244008	0.238742	0.801582	0.736452	909	27	626	66	56.6562	SIEMENS NM	168.266	0.269437	0.244906	0.31513	-1.15477	7124.53	256	2579.69	117		2016-11-29	58.6364	99.8941	0.9646	0.999633	0.70457	0.999633	0.131787	0.245189	0.632268	0.243487	0.273082	0.213893
2801672165			050Y	2018-01-17	65.4297	99.7626	0.884207	0.989641	0.632936	0.989641	0.176537	0.243068	0.568384	0.233842	0.258051	0.209633	0.241223	0.244801	0.764176	0.814045	923	52	1256	65	57.1875	SIEMENS NM	162.871	0.172082	0.24237	0.249655	-1.38767	8575.62	259	2964.62	114		2018-07-23	66.889	99.7987	0.886241	0.988359	0.56392	0.988359	0.111663	0.243068	0.560438	0.223565	0.230411	0.216719
1305382307			074Y	2012-10-17	69.0702	99.9329	0.963808	0.993749	0.868963	0.993749	0.167472	0.244453	0.794827	0.234801	0.21727	0.252333	0.242833	0.239966	0.784775	0.749619	895	4	207	67	55.9375	SIEMENS NM	152.358	0.309164	0.24359	0.209713	-1.56202	3562.49	258	1101.87	117		2013-04-02	62.0282	99.6934	0.928573	0.989535	0.60003	0.989535	0.150753	0.244453	0.651218	0.230718	0.221599	0.239837
0908742002			043Y	2018-07-24	62.5018	99.7538	0.95076	0.987818	0.612139	0.987818	0.147969	0.231525	0.461124	0.224142	0.212984	0.235301	0.241623	0.239753	0.769075	0.747267	769	2	1394	78	47.875	SIEMENS NM	167.256	0.148621	0.230848	0.245855	-1.40301	4145.8	262	1554.6	114		2018-09-12	59.6074	99.7669	0.945686	0.990071	0.641938	0.990071	0.140173	0.231525	0.595743	0.227346	0.239988	0.214703
0908402066			077Y	2018-07-25	68.1481	99.8219	0.918436	0.994666	0.65595	0.994666	0.174314	0.225078	0.504491	0.223877	0.245438	0.202316	0.242115	0.245133	0.775284	0.81959	1000	350	632	60	48.5	SIEMENS NM	165.978	0.170692	0.224288	0.247885	-1.39479	6211.23	256	1978.4	117		2019-03-11	69.8485	99.8471	0.837393	0.983626	0.530385	0.983626	0.186841	0.225078	0.539133	0.233077	0.25189	0.214264
3006742001			042Y	2017-04-05	66.1023	99.8954	0.906054	0.988613	0.64301	0.988613	0.147377	0.247162	0.497716	0.254332	0.241689	0.266976	0.246438	0.244899	0.84381	0.815672	833	201	751	72	51.1875	SIEMENS NM	156.58	0.347446	0.246408	0.337267	-1.08688	9356.03	263	3171.48	115		2017-12-18	65.068	99.8863	0.89831	0.992885	0.639748	0.992885	0.152148	0.247162	0.530776	0.235116	0.260613	0.209618
0201700603			047Y	2017-12-20	65.4622	99.6907	0.919793	0.989691	0.677016	0.989691	0.170046	0.247123	0.78307	0.239953	0.235185	0.24472	0.244046	0.243364	0.802156	0.792156	882	8	846	68	54.3125	SIEMENS NM	167.718	0.203458	0.246318	0.260729	-1.34427	6232.6	268	2152.6	118		2018-07-30	64.4618	99.7377	0.928854	0.991746	0.605928	0.991746	0.147045	0.247123	0.787487	0.238878	0.259027	0.218729
2107532222			064Y	2018-05-15	69.1063	99.9367	0.95152	0.995178	0.816771	0.995178	0.169949	0.215797	0.568088	0.262704	0.215656	0.309751	0.247516	0.241198	0.868015	0.763882	810	8	725	74	50.375	SIEMENS NM	162.085	0.345764	0.215795	0.301363	-1.19944	7341.6	257	2268.09	118		2019-02-01	69.8281	99.9041	0.939877	0.987187	0.723574	0.987187	0.166062	0.215797	0.507796	0.228293	0.201962	0.254624
0211592048			058Y	2018-07-31	67.9174	99.783	0.956372	0.989045	0.804215	0.989045	0.152675	0.25106	0.732095	0.260842	0.269358	0.252326	0.244468	0.245586	0.808683	0.827533	705	34	1028	85	43.5625	SIEMENS NM	166.505	0.309738	0.249495	0.300484	-1.20236	5196.24	260	1667.09	114		2019-07-09	66.5488	99.8539	0.942245	0.994749	0.693449	0.994749	0.194434	0.25106	0.770093	0.232662	0.238059	0.227264
2307572228			060Y	2018-01-11	74.8991	99.8295	0.937875	0.996115	0.680637	0.996115	0.177697	0.245895	0.659009	0.234334	0.226556	0.242111	0.240488	0.239112	0.755532	0.740337	967	0	604	62	59.5625	SIEMENS NM	169.9	0.190109	0.245577	0.214169	-1.54099	4318.57	259	1084	120		2018-08-02	67.1544	99.8124	0.900142	0.99403	0.548404	0.99403	0.197692	0.245895	0.551383	0.228189	0.219646	0.236731
2607402042			078Y	2018-08-06	68.7228	99.8696	0.945745	0.989535	0.681596	0.989535	0.154463	0.221737	0.730954	0.227115	0.26031	0.19392	0.240462	0.245331	0.755231	0.823016	909	13	870	66	56.125	SIEMENS NM	158.039	0.347369	0.221181	0.336651	-1.08871	6459.72	266	2020.42	117		2019-05-09	70.0461	99.8802	0.840806	0.980018	0.566558	0.980018	0.18492	0.221737	0.601056	0.235548	0.225302	0.245794
0804512213			062Y	2014-01-21	64.7406	99.8418	0.914409	0.994985	0.612878	0.994985	0.150609	0.227285	0.48019	0.227118	0.223603	0.230633	0.240196	0.239582	0.752199	0.745389	750	5	974	80	46.75	SIEMENS NM	156.629	0.152387	0.226517	0.25123	-1.38139	10127.5	264	3570.88	121		2017-10-26	64.8408	99.8058	0.925644	0.985676	0.685472	0.985676	0.17257	0.227285	0.501075	0.230642	0.23819	0.223093
2706482087			064Y	2013-01-23	70.8509	99.83	0.903362	0.99357	0.646672	0.99357	0.180514	0.249033	0.500635	0.227803	0.210766	0.244839	0.242366	0.239539	0.778541	0.744929	937	36	491	64	53.6875	SIEMENS NM	159.631	0.183098	0.248344	0.178799	-1.72149	5646.83	265	1646	120		2014-01-22	61.2625	99.8482	0.933503	0.994749	0.678057	0.994749	0.138089	0.249033	0.549805	0.239494	0.282152	0.196837
1107675936			070Y	2013-06-12	61.8782	99.8958	0.879247	0.987187	0.539546	0.987187	0.181384	0.228381	0.528514	0.229769	0.236275	0.223263	0.241817	0.242824	0.771498	0.784642	1111	7	503	54	67.5625	SIEMENS NM	156.52	0.178504	0.227764	0.235404	-1.44645	9395.48	263	3581.73	114		2014-09-15	20.8546	99.8245	0.969444	0.932865	0.7259	0.932865	0.164381	0.228381	0.465952	0.228738	0.218873	0.238604
2012422063			070Y	2013-06-12	68.6799	99.7899	0.824744	0.991212	0.510196	0.991212	0.166525	0.223831	0.471711	0.225249	0.239337	0.21116	0.239814	0.242143	0.747934	0.775639	895	22	600	67	53.5625	SIEMENS NM	165.436	0.210936	0.223022	0.246907	-1.39874	10897.8	263	3413.2	117		2014-06-16	64.0015	99.7806	0.868429	0.98221	0.609878	0.98221	0.202302	0.223831	0.455224	0.225585	0.217355	0.233815
2805512049			062Y	2013-11-12	62.3413	99.8705	0.881241	0.997349	0.573813	0.997349	0.127382	0.263782	0.466593	0.242067	0.266395	0.217738	0.2413	0.244911	0.765112	0.815859	1034	2	520	58	62.6562	SIEMENS NM	154.725	0.268749	0.263398	0.322391	-1.13199	11337	264	4269.36	124		2014-01-20	61.0934	99.8901	0.87999	0.99797	0.573158	0.99797	0.123118	0.263782	0.463464	0.24763	0.257067	0.238193
0711312060			080Y	2012-08-09	67.5177	99.7429	0.870584	0.991212	0.677298	0.991212	0.192273	0.247123	0.516363	0.235057	0.233485	0.236629	0.242369	0.242123	0.778577	0.775383	967	0	681	62	60.125	SIEMENS NM	163.412	0.201602	0.246318	0.212753	-1.54763	10094.3	263	3278.86	117		2013-02-04	65.8857	99.7633	0.880452	0.991746	0.66785	0.991746	0.189755	0.247123	0.593277	0.228525	0.236879	0.220171
0609772260			035Y	2013-03-08	68.307	99.8881	0.918288	0.985454	0.625573	0.985454	0.138772	0.243135	0.413731	0.238774	0.251661	0.225888	0.239984	0.242143	0.749823	0.775648	833	50	479	72	48.8125	SIEMENS NM	157.926	0.160639	0.242346	0.227577	-1.48027	6941.8	261	2200.07	113		2013-10-28	68.2073	99.8404	0.890517	0.988359	0.572373	0.988359	0.0685626	0.243135	0.421308	0.226852	0.250543	0.203161
0302502106			062Y	2013-01-10	65.5944	99.8034	0.875606	0.993939	0.572783	0.993939	0.136946	0.243855	0.606053	0.245714	0.233073	0.258355	0.244405	0.242558	0.807697	0.781072	952	35	1625	63	58.7188	SIEMENS NM	154.613	0.15137	0.243123	0.245404	-1.40485	7477.6	262	2572.72	119		2013-09-27	63.2131	99.8474	0.887977	0.990254	0.581436	0.990254	0.135505	0.243855	0.638147	0.24725	0.264483	0.230016
1003635458			050Y	2013-05-01	63.1317	99.9315	0.943989	0.988437	0.681978	0.988437	0.212216	0.227609	0.575499	0.229739	0.255426	0.204051	0.24068	0.244552	0.757747	0.810031	652	7	1003	92	41.75	SIEMENS NM	172.527	0.200336	0.226859	0.261801	-1.34017	6985.33	261	2575.37	114		2014-01-30	65.5354	99.883	0.936756	0.986338	0.605755	0.986338	0.211902	0.227609	0.460931	0.235368	0.224949	0.245787
2810522049			060Y	2012-12-14	67.942	99.7981	0.938929	0.990106	0.648314	0.990106	0.160654	0.225999	0.580428	0.23298	0.251218	0.214742	0.240642	0.243507	0.757302	0.794194	821	16	1172	73	51.8438	SIEMENS NM	162.797	0.313854	0.225799	0.317186	-1.14827	6685	265	2143.08	117		2014-01-30	66.3812	99.9	0.878873	0.987187	0.532477	0.987187	0.192503	0.225999	0.516932	0.233016	0.258138	0.207893
1303502364			063Y	2014-02-05	69.2609	99.8039	0.906699	0.995593	0.555483	0.995593	0.181093	0.24357	0.67726	0.224925	0.240186	0.209664	0.241378	0.243689	0.766066	0.79684	1132	180	1043	53	70.375	SIEMENS NM	160.61	0.178013	0.241281	0.193404	-1.64297	5135.52	256	1578.61	118		2014-07-09	65.5653	99.7862	0.934399	0.990805	0.575067	0.990805	0.132281	0.24357	0.640027	0.231968	0.261891	0.202045
1109322100			081Y	2014-02-06	68.3144	99.8357	0.930582	0.990522	0.651679	0.990522	0.184814	0.227989	0.436199	0.233223	0.243877	0.222569	0.243445	0.244899	0.793316	0.815672	1153	2	461	52	71.0312	SIEMENS NM	162.916	0.187492	0.227232	0.188468	-1.66883	9670.51	262	3064.16	117		2014-06-02	69.3628	99.7794	0.893068	0.990106	0.728508	0.990106	0.117755	0.227989	0.548313	0.232392	0.220461	0.244322
0210562498			057Y	2014-02-07	66.2297	99.9019	0.874706	0.986989	0.639973	0.986989	0.194578	0.223831	0.589287	0.229179	0.234001	0.224357	0.243737	0.244398	0.797548	0.807589	869	6	639	69	53.9062	SIEMENS NM	164.875	0.221801	0.223022	0.241333	-1.42158	8341.41	261	2816.92	113		2014-08-11	64.7856	99.9928	0.925971	0.98221	0.67942	0.98221	0.160705	0.223831	0.522809	0.223517	0.2132	0.233834
0412656272			047Y	2013-07-12	71.7934	99.7458	0.851874	0.981489	0.647011	0.981489	0.164123	0.266952	0.66393	0.224107	0.246694	0.201521	0.241378	0.244675	0.766066	0.812005	659	6	1046	91	41.3125	SIEMENS NM	159.069	0.158241	0.265282	0.256104	-1.36217	7766.16	269	2190.57	113		2014-02-20	71.5959	99.7175	0.799932	0.995792	0.463607	0.995792	0.155219	0.266952	0.628696	0.232902	0.247239	0.218564
2801502162			062Y	2012-11-15	71.2202	99.8451	0.913874	0.990942	0.704312	0.990942	0.187167	0.243187	0.643906	0.228236	0.204247	0.252224	0.243953	0.240221	0.800758	0.752479	857	188	553	70	55.6563	SIEMENS NM	170.34	0.200001	0.242346	0.180841	-1.71014	6323.88	268	1820	119		2013-11-25	64.9513	99.8443	0.875215	0.989691	0.589758	0.989691	0.150424	0.243187	0.534151	0.237988	0.224983	0.250994
2704682224			044Y	2012-08-13	70.6591	100.08	0.846778	0.992611	0.539703	0.992611	0.156458	0.247261	0.64258	0.230632	0.248423	0.21284	0.23978	0.242699	0.747564	0.782957	882	25	1278	68	57	SIEMENS NM	169.581	0.16978	0.246708	0.244645	-1.40795	6818.37	267	2000.57	120		2013-04-08	68.409	99.8344	0.955644	0.996593	0.535196	0.996593	0.120305	0.247261	0.629154	0.237256	0.250429	0.224083
0206792107			033Y	2012-10-22	70.1777	99.859	0.945266	0.990399	0.581181	0.990399	0.137585	0.24202	0.679096	0.229838	0.241916	0.217761	0.243557	0.245171	0.794919	0.820248	1000	28	557	60	57.7813	SIEMENS NM	162.835	0.157298	0.241293	0.235626	-1.44551	4596.9	269	1370.9	119		2013-10-04	64.7715	99.8907	0.925687	0.992228	0.619083	0.992228	0.0660394	0.24202	0.580181	0.272466	0.246894	0.298038
1312602406			052Y	2013-05-22	68.5645	99.7728	0.913853	0.990665	0.66634	0.990665	0.205871	0.247123	0.612072	0.23059	0.241639	0.21954	0.243438	0.244939	0.793209	0.816324	714	0	845	84	44.3438	SIEMENS NM	163.38	0.222557	0.246492	0.240626	-1.42451	6266	264	1969.75	117		2014-03-03	66.4142	99.8115	0.891786	0.991746	0.554369	0.991746	0.0917426	0.247123	0.575398	0.233142	0.222755	0.243528
3101422000			070Y	2012-09-17	68.6073	99.8039	0.84862	0.9898	0.59104	0.9898	0.103923	0.246451	0.624556	0.231858	0.231302	0.232414	0.243275	0.243193	0.79089	0.789745	1052	10	833	57	65.0938	SIEMENS NM	149.432	0.115956	0.245809	0.209001	-1.56542	9196.4	261	2887	115		2013-07-02	68.6159	99.8646	0.848924	0.991212	0.620598	0.991212	0.168318	0.246451	0.696568	0.238775	0.234085	0.243464
2202632026			049Y	2013-02-06	67.8835	99.7593	0.892626	0.988531	0.635052	0.988531	0.178351	0.230218	0.766118	0.232795	0.271297	0.194294	0.238885	0.244915	0.737946	0.815925	779	24	866	77	48.5625	SIEMENS NM	161.131	0.172929	0.229522	0.260492	-1.34518	8361.53	270	2685.43	118		2013-12-23	65.8708	99.7993	0.871743	0.988874	0.568647	0.988874	0.163676	0.230218	0.670058	0.23124	0.251939	0.210542
2709602148			052Y	2013-07-23	68.7384	99.8748	0.885753	0.992024	0.562909	0.992024	0.198317	0.227072	0.500486	0.212827	0.174745	0.250908	0.243434	0.237086	0.793148	0.719949	857	4	564	70	54.1562	SIEMENS NM	161.545	0.194359	0.226392	0.240258	-1.42604	7202.62	257	2251.66	115		2014-04-28	66.4133	99.8133	0.895807	0.988613	0.591723	0.988613	0.219515	0.227072	0.518877	0.227197	0.25331	0.201084
0707642108			048Y	2013-05-17	88.5459	100.042	0.973007	0.99506	0.745143	0.99506	0.183095	0.246492	0.637385	0.243949	0.209892	0.278007	0.247197	0.242934	0.860318	0.78615	1016	9	479	59	67.7812	SIEMENS NM	166.932	0.418961	0.245723	0.276303	-1.28626	2840.33	266	325.333	122		2014-03-18	63.6466	100.402	0.95952	0.991212	0.774015	0.991212	0.154533	0.246492	0.651788	0.24071	0.261942	0.219478
[truncated: 23 more columns]
